# Supplementary material for: Predicted rat interactome database and gene set linkage analysis
Source: Database (Oxford). 2020 Nov 20;2020:baaa086. doi: 10.1093/database/baaa086 (PMC7678787; doi:10.1093/database/baaa086)
Supplement: baaa086_Supp [file baaa086_supp.zip]

Archive with 10 entries (10 files):
- Supplementary_Figure_s1_-_rat.png
- Table_S1.pdf
- Table_S2.pdf
- Table_S3.pdf
- Table_S4.pdf
- Table_S5.pdf
- Table_S6.pdf
- Table_S7.pdf
- Table_S8.pdf
- Table_S9.pdf
