# Supplementary material for: OUP accepted manuscript
Source: Oxford University Press journal article supplement (doi:10.1093/database/baaa086), 2020-01-01
Supplement: baaa086_supp.zip [file baaa086_supp.zip]

**Supplementary Table 7. Annotations reported by DAVID for the top 250 transcriptionally changed genes.**

|                      |                                                                                                                                                                                                              |       |             |             |                                                                      |            |          |           |                 |            |            |            |
|----------------------|--------------------------------------------------------------------------------------------------------------------------------------------------------------------------------------------------------------|-------|-------------|-------------|----------------------------------------------------------------------|------------|----------|-----------|-----------------|------------|------------|------------|
| Annotation Cluster 1 | Enrichment Score: 3.168883685307409                                                                                                                                                                          |       |             |             |                                                                      |            |          |           |                 |            |            |            |
| Category             | Term                                                                                                                                                                                                         | Count | %           | PValue      | Genes                                                                | List Total | Pop Hits | Pop Total | Fold Enrichment | Bonferroni | Benjamini  | FDR        |
| UP_KEYWORDS          | Dioxygenase                                                                                                                                                                                                  | 8     | 3.827751196 | 3.16E-07    | P4HA2, P4HA1, JMJD6, PLOD2, EGLN3, KDM3A, EGLN1, ALKBH5              | 206        | 46       | 20793     | 17.5542423      | 6.44E-05   | 6.44E-05   | 3.97E-04   |
| INTERPRO             | IPR006620:Prolyl 4-hydroxylase, alpha subunit                                                                                                                                                                | 5     | 2.392344498 | 1.75E-05    | P4HA2, P4HA1, PLOD2, EGLN3, EGLN1                                    | 199        | 16       | 19384     | 30.43969849     | 0.00818954 | 0.00818954 | 0.02492752 |
| GOTERM_BP_DIRECT     | GO:0018401~peptidyl-proline hydroxylation to 4-hydroxy-L-proline                                                                                                                                             | 4     | 1.913875598 | 2.08E-05    | P4HA2, P4HA1, EGLN3, EGLN1                                           | 181        | 6        | 17535     | 64.58563536     | 0.02742495 | 0.00922652 | 0.03407123 |
| SMART                | SM00702:P4Hc                                                                                                                                                                                                 | 5     | 2.392344498 | 2.41E-05    | P4HA2, P4HA1, PLOD2, EGLN3, EGLN1                                    | 109        | 16       | 9680      | 27.75229358     | 0.00273855 | 0.00273855 | 0.02735347 |
| GOTERM_MF_DIRECT     | GO:0031418~L-ascorbic acid binding                                                                                                                                                                           | 5     | 2.392344498 | 4.79E-05    | P4HA2, P4HA1, PLOD2, EGLN3, EGLN1                                    | 174        | 20       | 16650     | 23.92241379     | 0.01784695 | 0.01784695 | 0.06617909 |
| INTERPRO             | IPR005123:Oxoglutarate/iron-dependent dioxygenase                                                                                                                                                            | 5     | 2.392344498 | 5.52E-05    | P4HA2, P4HA1, PLOD2, EGLN3, EGLN1                                    | 199        | 21       | 19384     | 23.19215123     | 0.02564655 | 0.01290656 | 0.07873656 |
| UP_KEYWORDS          | Vitamin C                                                                                                                                                                                                    | 4     | 1.913875598 | 3.17E-04    | P4HA1, PLOD2, EGLN3, EGLN1                                           | 206        | 14       | 20793     | 28.83911234     | 0.06268309 | 0.02134681 | 0.39822557 |
| UP_SEQ_FEATURE       | domain:Fe2OG dioxygenase                                                                                                                                                                                     | 4     | 1.913875598 | 3.58E-04    | P4HA1, PLOD2, EGLN3, EGLN1                                           | 108        | 11       | 7976      | 26.85521886     | 0.13504881 | 0.13504881 | 0.49931052 |
| UP_SEQ_FEATURE       | binding site:2-oxoglutarate                                                                                                                                                                                  | 3     | 1.435406699 | 0.001736591 | P4HA1, EGLN3, EGLN1                                                  | 108        | 5        | 7976      | 44.31111111     | 0.50536287 | 0.29669556 | 2.39944018 |
| UP_SEQ_FEATURE       | metal ion-binding site:Iron                                                                                                                                                                                  | 4     | 1.913875598 | 0.017296043 | P4HA1, PLOD2, EGLN3, EGLN1                                           | 108        | 41       | 7976      | 7.205058717     | 0.99914652 | 0.90514393 | 21.6353156 |
| GOTERM_MF_DIRECT     | GO:0005506~iron ion binding                                                                                                                                                                                  | 7     | 3.349282297 | 0.019078084 | P4HA2, P4HA1, JMJD6, PLOD2, EGLN3, KDM3A, EGLN1                      | 174        | 202      | 16650     | 3.31597815      | 0.9992846  | 0.70094016 | 23.3754896 |
| GOTERM_MF_DIRECT     | GO:0016706~oxidoreductase activity, acting on paired donors, with incorporation or reduction of molecular oxygen, 2-oxoglutarate as one donor, and incorporation of one atom each of oxygen into both donors | 3     | 1.435406699 | 0.021635695 | EGLN3, EGLN1, ALKBH5                                                 | 174        | 22       | 16650     | 13.04858934     | 0.99973194 | 0.6422924  | 26.09134   |
| UP_KEYWORDS          | Iron                                                                                                                                                                                                         | 8     | 3.827751196 | 0.022174605 | P4HA1, JMJD6, PLOD2, EGLN3, ACP5, KDM3A, EGLN1, ALKBH5               | 206        | 282      | 20793     | 2.863457963     | 0.98968884 | 0.23592543 | 24.570731  |
| UP_KEYWORDS          | Oxidoreductase                                                                                                                                                                                               | 10    | 4.784688995 | 0.056792622 | ERO1A, P4HA2, SQLE, P4HA1, JMJD6, PLOD2, EGLN3, KDM3A, EGLN1, ALKBH5 | 206        | 494      | 20793     | 2.043256947     | 0.9999934  | 0.37942444 | 52.0602716 |
| GOTERM_BP_DIRECT     | GO:0055114~oxidation-reduction process                                                                                                                                                                       | 10    | 4.784688995 | 0.2265724   | ERO1A, P4HA2, SQLE, P4HA1, JMJD6, PLOD2, EGLN3, KDM3A, EGLN1, HIGD1A | 181        | 651      | 17535     | 1.48814828      | 1          | 0.97207383 | 98.5145596 |
| Annotation Cluster 2 | Enrichment Score: 2.196893822653743                                                                                                                                                                          |       |             |             |                                                                      |            |          |           |                 |            |            |            |
| Category             | Term                                                                                                                                                                                                         | Count | %           | PValue      | Genes                                                                | List Total | Pop Hits | Pop Total | Fold Enrichment | Bonferroni | Benjamini  | FDR        |
| UP_KEYWORDS          | Glycolysis                                                                                                                                                                                                   | 5     | 2.392344498 | 3.78E-04    | GPI, PFKL, ALDOC, HK2, PGK1                                          | 206        | 35       | 20793     | 14.41955617     | 0.07424598 | 0.01531092 | 0.47440496 |
| KEGG_PATHWAY         | mo00500:Starch and sucrose metabolism                                                                                                                                                                        | 5     | 2.392344498 | 4.04E-04    | GPI, GBE1, PYGL, PGM1, HK2                                           | 90         | 31       | 7749      | 13.88709677     | 0.05990491 | 0.03041499 | 0.48263125 |
| GOTERM_BP_DIRECT     | GO:0006096~glycolytic process                                                                                                                                                                                | 5     | 2.392344498 | 6.67E-04    | GPI, PFKL, ALDOC, HK2, PGK1                                          | 181        | 39       | 17535     | 12.42031449     | 0.59028676 | 0.13818642 | 1.08749955 |
| KEGG_PATHWAY         | rno00010:Glycolysis / Gluconeogenesis                                                                                                                                                                        | 6     | 2.870813397 | 0.001201016 | GPI, PFKL, ALDOC, PGM1, HK2, PGK1                                    | 90         | 70       | 7749      | 7.38            | 0.16795266 | 0.04492603 | 1.42967151 |
| KEGG_PATHWAY         | mo00030:Pentose phosphate pathway                                                                                                                                                                            | 4     | 1.913875598 | 0.004312485 | GPI, PFKL, ALDOC, PGM1                                               | 90         | 29       | 7749      | 11.87586207     | 0.48378759 | 0.09013807 | 5.046828   |
| KEGG_PATHWAY         | mo00051:Fructose and mannose metabolism                                                                                                                                                                      | 4     | 1.913875598 | 0.008584949 | PFKL, PFKFB3, ALDOC, HK2                                             | 90         | 37       | 7749      | 9.308108108     | 0.7326423  | 0.12358607 | 9.8156034  |
| GOTERM_BP_DIRECT     | GO:0005975~carbohydrate metabolic process                                                                                                                                                                    | 6     | 2.870813397 | 0.009398149 | HAGH, GPI, PFKL, HEXB, PGM1, PGK1                                    | 181        | 125      | 17535     | 4.650165746     | 0.99999671 | 0.50409684 | 14.333511  |
| KEGG_PATHWAY         | mo01200:Carbon metabolism                                                                                                                                                                                    | 6     | 2.870813397 | 0.012508273 | GPI, PFKL, ALDOC, HK2, GPT, PGK1                                     | 90         | 121      | 7749      | 4.269421488     | 0.85424606 | 0.16060673 | 14.0002997 |

|                                  |                                                      |       |             |             |                                                                                                                                                                              |            |          |           |                 |            |            |            |
|----------------------------------|------------------------------------------------------|-------|-------------|-------------|------------------------------------------------------------------------------------------------------------------------------------------------------------------------------|------------|----------|-----------|-----------------|------------|------------|------------|
| KEGG_PATHWAY                     | rno01130:Biosynthesis of antibiotics                 | 8     | 3.827751196 | 0.012698314 | GPI, PFKL, SQLE, ALDOC, PGM1, HK2, AK4, PGK1                                                                                                                                 | 90         | 219      | 7749      | 3.145205479     | 0.85847557 | 0.15035804 | 14.198408  |
| KEGG_PATHWAY                     | rno01230:Biosynthesis of amino acids                 | 5     | 2.392344498 | 0.013823865 | PFKL, ALDOC, GPT, MAT2B, PGK1                                                                                                                                                | 90         | 81       | 7749      | 5.314814815     | 0.88113971 | 0.15111476 | 15.3631859 |
| KEGG_PATHWAY                     | rno00520:Amino sugar and nucleotide sugar metabolism | 4     | 1.913875598 | 0.017461051 | GPI, HEXB, PGM1, HK2                                                                                                                                                         | 90         | 48       | 7749      | 7.175           | 0.93246707 | 0.15502332 | 19.0287707 |
| KEGG_PATHWAY                     | rno00052:Galactose metabolism                        | 3     | 1.435406699 | 0.051789105 | PFKL, PGM1, HK2                                                                                                                                                              | 90         | 32       | 7749      | 8.071875        | 0.99970728 | 0.30914904 | 47.1235722 |
| UP_SEQ_FEATURE                   | binding site:Substrate                               | 5     | 2.392344498 | 0.326268504 | PFKL, JMJD6, ALDOC, COMT, PGK1                                                                                                                                               | 108        | 215      | 7976      | 1.717484927     | 1          | 0.99995444 | 99.5987638 |
| Annotation Cluster 3<br>Category | Enrichment Score: 1.9520159924652232<br>Term         | Count | %           | PValue      | Genes                                                                                                                                                                        | List Total | Pop Hits | Pop Total | Fold Enrichment | Bonferroni | Benjamini  | FDR        |
| UP_KEYWORDS                      | Kinase                                               | 17    | 8.133971292 | 3.70E-04    | PDK1, ACVRL1, PFKL, PFKFB3, PRKAG2, SPHK1, HK2, AK4, KDR, PRKCQ, CDKN1B, MAP3K8, ZAP70, PGK1, KSR1, EIF2AK4, PLAU                                                            | 206        | 609      | 20793     | 2.817614424     | 0.07280446 | 0.01872026 | 0.46485929 |
| UP_KEYWORDS                      | Transferase                                          | 25    | 11.96172249 | 0.002689401 | PDK1, ACVRL1, PFKL, PFKFB3, SPHK1, PRKAG2, HK2, UPP1, AK4, COMT, CHPT1, BMT2, KDR, PARP16, PRKCQ, CDKN1B, PYGL, WWP1, MAP3K8, ZAP70, GPT, KSR1, PGK1, EIF2AK4, PLAU          | 206        | 1316     | 20793     | 1.917494172     | 0.42269053 | 0.07548167 | 3.32967364 |
| GOTERM_MF_DIRECT                 | GO:0005524~ATP binding                               | 25    | 11.96172249 | 0.010494714 | PDK1, CLCN3, ACVRL1, PFKL, PFKFB3, SPHK1, PRKAG2, HK2, ATP11B, HSPA1A, AK4, HLTf, KDR, RIMKLB, PRKCQ, PYGL, MAP3K8, DDX50, ZAP70, TEP1, SLC22A5, KSR1, PGK1, ENTPD2, EIF2AK4 | 174        | 1403     | 16650     | 1.705090078     | 0.9810673  | 0.73347525 | 13.5694396 |
| UP_KEYWORDS                      | Nucleotide-binding                                   | 23    | 11.00478469 | 0.011795708 | PDK1, SLC27A1, CLCN3, ACVRL1, DNM1L, PFKL, PFKFB3, SPHK1, HK2, ATP11B, HSPA1A, AK4, KDR, PRKCQ, PYGL, MAP3K8, ZAP70, TEP1, SLC22A5, PGK1, ENTPD2, RASD1, EIF2AK4             | 206        | 1327     | 20793     | 1.749471397     | 0.9111343  | 0.15878001 | 13.8610115 |
| UP_KEYWORDS                      | ATP-binding                                          | 19    | 9.090909091 | 0.013446339 | PDK1, CLCN3, ACVRL1, PFKL, PFKFB3, SPHK1, HK2, ATP11B, HSPA1A, AK4, KDR, PRKCQ, MAP3K8, ZAP70, TEP1, SLC22A5, PGK1, ENTPD2, EIF2AK4                                          | 206        | 1029     | 20793     | 1.863752158     | 0.93681335 | 0.16815638 | 15.6528695 |
| UP_SEQ_FEATURE                   | nucleotide phosphate-binding region:ATP              | 12    | 5.741626794 | 0.038307795 | PDK1, PRKCQ, CLCN3, ACVRL1, PFKL, PFKFB3, MAP3K8, TEP1, AK4, SLC22A5, PGK1, KDR                                                                                              | 108        | 450      | 7976      | 1.969382716     | 0.99999987 | 0.95774056 | 42.0626332 |
| UP_SEQ_FEATURE                   | binding site:ATP                                     | 6     | 2.870813397 | 0.341105313 | PDK1, PRKCQ, ACVRL1, MAP3K8, PGK1, KDR                                                                                                                                       | 108        | 287      | 7976      | 1.543941154     | 1          | 0.99995174 | 99.7060546 |
| Annotation Cluster 4<br>Category | Enrichment Score: 1.5317619216130294<br>Term         | Count | %           | PValue      | Genes                                                                                                                                                                        | List Total | Pop Hits | Pop Total | Fold Enrichment | Bonferroni | Benjamini  | FDR        |
| INTERPRO                         | IPR002017:Spectrin repeat                            | 3     | 1.435406699 | 0.022813956 | SYNE1, ACTN1, DST                                                                                                                                                            | 199        | 23       | 19384     | 12.70526546     | 0.99998098 | 0.97330505 | 28.0747734 |
| INTERPRO                         | IPR018159:Spectrin/alpha-actinin                     | 3     | 1.435406699 | 0.030821557 | SYNE1, ACTN1, DST                                                                                                                                                            | 199        | 27       | 19384     | 10.82300391     | 0.99999961 | 0.97493654 | 36.0480695 |

|                      |                                         |       |             |             |                                                                                                                                                                                                                                                                                                    |            |          |           |                 |            |            |            |
|----------------------|-----------------------------------------|-------|-------------|-------------|----------------------------------------------------------------------------------------------------------------------------------------------------------------------------------------------------------------------------------------------------------------------------------------------------|------------|----------|-----------|-----------------|------------|------------|------------|
| SMART                | SM00150:SPEC                            | 3     | 1.435406699 | 0.036112625 | SYNE1, ACTN1, DST                                                                                                                                                                                                                                                                                  | 109        | 27       | 9680      | 9.867482161     | 0.98489929 | 0.87711507 | 34.183192  |
| Annotation Cluster 5 | Enrichment Score: 1.3908261786922977    |       |             |             |                                                                                                                                                                                                                                                                                                    |            |          |           |                 |            |            |            |
| Category             | Term                                    | Count | %           | PValue      | Genes                                                                                                                                                                                                                                                                                              | List Total | Pop Hits | Pop Total | Fold Enrichment | Bonferroni | Benjamini  | FDR        |
| UP_KEYWORDS          | Glycoprotein                            | 38    | 18.18181818 | 4.28E-04    | SCPEP1, IL1R2, CLCN3, ACVRL1, LRRC8A, EFNA1, MMP9, FCNA, HEXB, ACP5, FASLG, HP, PLPP1, GPR1, WNT4, NPTX1, ERO1A, PLOD2, P4HA1, TSPAN31, IL1RAP, SLC2A1, SLC22A5, VWA1, ENTPD2, RAMP3, IL2RB, DNM1L, PFKL, ABHD18, ASIC1, MMP12, KDR, SLC6A8, VEGFA, CD200, CR1L, VLDLR                             | 206        | 2123     | 20793     | 1.806689563     | 0.08360104 | 0.01444523 | 0.53669485 |
| UP_SEQ_FEATURE       | glycosylation site:N-linked (GlcNAc...) | 35    | 16.74641148 | 0.03337879  | SCPEP1, IL1R2, CLCN3, ACVRL1, LRRC8A, EFNA1, MMP9, FCNA, HEXB, ACP5, FASLG, HP, GPR1, WNT4, NPTX1, ERO1A, PLOD2, P4HA1, TSPAN31, IL1RAP, SLC2A1, SLC22A5, VWA1, ENTPD2, RAMP3, IL2RB, ABHD18, ASIC1, MMP12, KDR, SLC6A8, VEGFA, CD200, CR1L, VLDLR                                                 | 108        | 1887     | 7976      | 1.369801174     | 0.99999893 | 0.96784841 | 37.7724721 |
| UP_KEYWORDS          | Disulfide bond                          | 30    | 14.35406699 | 0.064079226 | IL1R2, ACVRL1, EFNA1, MMP9, FCNA, HEXB, ACP5, FASLG, HP, GPR1, WNT4, NPTX1, ERO1A, IL1RAP, VWA1, DNAJC3, ENTPD2, RAMP3, IL2RB, EFEMP2, ASIC1, MMP12, KDR, ADAMTS9, FBLN1, VEGFA, CD200, CR1L, PLAUI, VLDLR                                                                                         | 206        | 2199     | 20793     | 1.377038106     | 0.99999864 | 0.39368917 | 56.5146439 |
| UP_KEYWORDS          | Signal                                  | 42    | 20.09569378 | 0.101594263 | SCPEP1, IL1R2, CPM, ACVRL1, EFNA1, MMP9, FCNA, HEXB, ACP5, CDCP1, HP, WNT4, NPTX1, ERO1A, P4HA2, PLOD2, LRG1, P4HA1, TMEM59, IL1RAP, DNAJC3, VWA1, ENTPD2, RAMP3, IL2RB, TBL2, ABHD18, EFEMP2, MMP12, KDR, CTSM, ADAMTS9, FBLN1, DNAJB9, KAZALD1, VEGFA, VOPP1, SLC27A3, CD200, CR1L, PLAUI, VLDLR | 206        | 3420     | 20793     | 1.239575881     | 1          | 0.46443617 | 74.0022647 |
| UP_SEQ_FEATURE       | signal peptide                          | 27    | 12.91866029 | 0.151637191 | SCPEP1, IL1R2, ACVRL1, EFNA1, MMP9, FCNA, HEXB, ACP5, HP, NPTX1, WNT4, ERO1A, P4HA1, PLOD2, IL1RAP, VWA1, DNAJC3, RAMP3, IL2RB, ABHD18, MMP12, KDR, VEGFA, CD200, CR1L, PLAUI, VLDLR                                                                                                               | 108        | 1586     | 7976      | 1.257250946     | 1          | 0.99938881 | 89.9526495 |

|                       |                                                                  |       |             |             |                                                                                                                                          |            |          |           |                 |            |            |            |
|-----------------------|------------------------------------------------------------------|-------|-------------|-------------|------------------------------------------------------------------------------------------------------------------------------------------|------------|----------|-----------|-----------------|------------|------------|------------|
| UP_SEQ_FEATURE        | disulfide bond                                                   | 21    | 10.04784689 | 0.320532301 | RAMP3, IL1R2, IL2RB, EFNA1, MMP9, HEXB, FASLG, ACP5, HP, ASIC1, GPR1, MMP12, NPTX1, ERO1A, VEGFA, IL1RAP, VWA1, CD200, PLAU, CRIL, VLDLR | 108        | 1327     | 7976      | 1.168718078     | 1          | 0.99997059 | 99.548301  |
| Annotation Cluster 6  | Enrichment Score: 1.351022077861093                              |       |             |             |                                                                                                                                          |            |          |           |                 |            |            |            |
| Category              | Term                                                             | Count | %           | PValue      | Genes                                                                                                                                    | List Total | Pop Hits | Pop Total | Fold Enrichment | Bonferroni | Benjamini  | FDR        |
| UP_KEYWORDS           | Angiogenesis                                                     | 5     | 2.392344498 | 0.002734207 | GPI, ACVRL1, EFNA1, VEGFA, KDR                                                                                                           | 206        | 59       | 20793     | 8.553974        | 0.42795761 | 0.06743626 | 3.38427263 |
| GOTERM_BP_DIRECT      | GO:0045766~positive regulation of angiogenesis                   | 6     | 2.870813397 | 0.007165943 | ACVRL1, LRG1, MMP9, VEGFA, SPHK1, KDR                                                                                                    | 181        | 117      | 17535     | 4.968125797     | 0.9999333  | 0.49682201 | 11.1153125 |
| GOTERM_BP_DIRECT      | GO:0001938~positive regulation of endothelial cell proliferation | 4     | 1.913875598 | 0.035285183 | ACVRL1, LRG1, VEGFA, KDR                                                                                                                 | 181        | 70       | 17535     | 5.535911602     | 1          | 0.69902192 | 44.4875213 |
| GOTERM_BP_DIRECT      | GO:0001525~angiogenesis                                          | 6     | 2.870813397 | 0.041413516 | GPI, ACVRL1, EFNA1, VEGFA, PLAU, KDR                                                                                                     | 181        | 184      | 17535     | 3.15907999      | 1          | 0.72340645 | 49.9913456 |
| KEGG_PATHWAY          | mo04015:Rap1 signaling pathway                                   | 4     | 1.913875598 | 0.453692122 | PARD6B, EFNA1, VEGFA, KDR                                                                                                                | 90         | 216      | 7749      | 1.594444444     | 1          | 0.88945931 | 99.9285785 |
| GOTERM_BP_DIRECT      | GO:0016477~cell migration                                        | 3     | 1.435406699 | 0.602930261 | EFNA1, VEGFA, KDR                                                                                                                        | 181        | 197      | 17535     | 1.475306391     | 1          | 0.9999251  | 99.9999732 |
| Annotation Cluster 7  | Enrichment Score: 1.2053612444387278                             |       |             |             |                                                                                                                                          |            |          |           |                 |            |            |            |
| Category              | Term                                                             | Count | %           | PValue      | Genes                                                                                                                                    | List Total | Pop Hits | Pop Total | Fold Enrichment | Bonferroni | Benjamini  | FDR        |
| GOTERM_BP_DIRECT      | GO:0051894~positive regulation of focal adhesion assembly        | 3     | 1.435406699 | 0.019361236 | WNT4, VEGFA, KDR                                                                                                                         | 181        | 21       | 17535     | 13.83977901     | 1          | 0.63409397 | 27.4088915 |
| KEGG_PATHWAY          | mo05205:Proteoglycans in cancer                                  | 7     | 3.349282297 | 0.027721176 | CBLB, WNT4, MMP9, VEGFA, FASLG, PLAU, KDR                                                                                                | 90         | 201      | 7749      | 2.998507463     | 0.98644821 | 0.20258569 | 28.5992341 |
| GOTERM_BP_DIRECT      | GO:0048754~branching morphogenesis of an epithelial tube         | 3     | 1.435406699 | 0.05257348  | WNT4, VEGFA, KDR                                                                                                                         | 181        | 36       | 17535     | 8.07320442      | 1          | 0.75056943 | 58.7219253 |
| UP_KEYWORDS           | Developmental protein                                            | 6     | 2.870813397 | 0.534617989 | WNT4, JMJD6, VEGFA, MTURN, CRIL, KDR                                                                                                     | 206        | 492      | 20793     | 1.230937722     | 1          | 0.9126741  | 99.9933497 |
| Annotation Cluster 8  | Enrichment Score: 1.1701569028008831                             |       |             |             |                                                                                                                                          |            |          |           |                 |            |            |            |
| Category              | Term                                                             | Count | %           | PValue      | Genes                                                                                                                                    | List Total | Pop Hits | Pop Total | Fold Enrichment | Bonferroni | Benjamini  | FDR        |
| UP_KEYWORDS           | Biological rhythms                                               | 4     | 1.913875598 | 0.041917288 | ID3, BHLHE40, NFIL3, NOCT                                                                                                                | 206        | 78       | 20793     | 5.176250934     | 0.99983923 | 0.36856742 | 41.6353058 |
| UP_KEYWORDS           | Repressor                                                        | 6     | 2.870813397 | 0.057401823 | FASLG, HBP1, ID3, BHLHE40, NFIL3, GZF1                                                                                                   | 206        | 210      | 20793     | 2.883911234     | 0.99999421 | 0.37112762 | 52.4481722 |
| GOTERM_BP_DIRECT      | GO:0007623~circadian rhythm                                      | 4     | 1.913875598 | 0.128295208 | ID3, BHLHE40, NFIL3, NOCT                                                                                                                | 181        | 121      | 17535     | 3.202593489     | 1          | 0.91350604 | 89.4559835 |
| Annotation Cluster 9  | Enrichment Score: 1.1464458393870895                             |       |             |             |                                                                                                                                          |            |          |           |                 |            |            |            |
| Category              | Term                                                             | Count | %           | PValue      | Genes                                                                                                                                    | List Total | Pop Hits | Pop Total | Fold Enrichment | Bonferroni | Benjamini  | FDR        |
| GOTERM_BP_DIRECT      | GO:0030198~extracellular matrix organization                     | 5     | 2.392344498 | 0.017770604 | FBLN1, ERO1A, MMP9, KAZALD1, VWA1                                                                                                        | 181        | 97       | 17535     | 4.993734693     | 1          | 0.63170555 | 25.455479  |
| UP_KEYWORDS           | Extracellular matrix                                             | 5     | 2.392344498 | 0.042834658 | FBLN1, WNT4, MMP9, VWA1, MMP12                                                                                                           | 206        | 133      | 20793     | 3.794620045     | 0.99986777 | 0.3601664  | 42.3341504 |
| GOTERM_CC_DIRECT      | GO:0005578~proteinaceous extracellular matrix                    | 7     | 3.349282297 | 0.046236352 | ADAMTS9, FBLN1, WNT4, MMP9, KAZALD1, VWA1, MMP12                                                                                         | 191        | 253      | 18520     | 2.682780457     | 0.99995823 | 0.67383943 | 45.0894641 |
| GOTERM_CC_DIRECT      | GO:0031012~extracellular matrix                                  | 3     | 1.435406699 | 0.737455135 | FBLN1, MMP9, MMP12                                                                                                                       | 191        | 254      | 18520     | 1.145236427     | 1          | 0.99436708 | 99.9999956 |
| Annotation Cluster 10 | Enrichment Score: 1.1021335054286876                             |       |             |             |                                                                                                                                          |            |          |           |                 |            |            |            |
| Category              | Term                                                             | Count | %           | PValue      | Genes                                                                                                                                    | List Total | Pop Hits | Pop Total | Fold Enrichment | Bonferroni | Benjamini  | FDR        |

|                       |                                                              |       |             |             |                                                                           |            |          |           |                 |            |            |            |
|-----------------------|--------------------------------------------------------------|-------|-------------|-------------|---------------------------------------------------------------------------|------------|----------|-----------|-----------------|------------|------------|------------|
| GOTERM_BP_DIRECT      | GO:0006508~proteolysis                                       | 11    | 5.263157895 | 0.024118534 | CASP6, CBLB, ADAMTS9, TMEM59, MMP9, SCRN1, PREPL, HP, CTLA2A, PLAU, MMP12 | 181        | 472      | 17535     | 2.257760558     | 1          | 0.6281047  | 32.9682742 |
| UP_KEYWORDS           | Protease                                                     | 8     | 3.827751196 | 0.14202623  | SCPEP1, CASP6, CPM, ADAMTS9, MMP9, PREPL, PLAU, MMP12                     | 206        | 437      | 20793     | 1.847814979     | 1          | 0.56059957 | 85.4299076 |
| UP_KEYWORDS           | Zymogen                                                      | 4     | 1.913875598 | 0.144171701 | CASP6, MMP9, PLAU, MMP12                                                  | 206        | 133      | 20793     | 3.035696036     | 1          | 0.55707506 | 85.8814827 |
| Annotation Cluster 11 | Enrichment Score: 1.0511531071161389                         |       |             |             |                                                                           |            |          |           |                 |            |            |            |
| Category              | Term                                                         | Count | %           | PValue      | Genes                                                                     | List Total | Pop Hits | Pop Total | Fold Enrichment | Bonferroni | Benjamini  | FDR        |
| GOTERM_BP_DIRECT      | GO:0045766~positive regulation of angiogenesis               | 6     | 2.870813397 | 0.007165943 | ACVRL1, LRG1, MMP9, VEGFA, SPHK1, KDR                                     | 181        | 117      | 17535     | 4.968125797     | 0.9999333  | 0.49682201 | 11.1153125 |
| GOTERM_BP_DIRECT      | GO:0001934~positive regulation of protein phosphorylation    | 5     | 2.392344498 | 0.123151047 | MMP9, VEGFA, SPHK1, FIZ1, KDR                                             | 181        | 185      | 17535     | 2.618336569     | 1          | 0.9099127  | 88.3889021 |
| KEGG_PATHWAY          | rno04370:VEGF signaling pathway                              | 3     | 1.435406699 | 0.150966015 | VEGFA, SPHK1, KDR                                                         | 90         | 60       | 7749      | 4.305           | 1          | 0.57828554 | 85.9284949 |
| GOTERM_BP_DIRECT      | GO:0030335~positive regulation of cell migration             | 5     | 2.392344498 | 0.160489385 | VEGFA, SPHK1, ACP5, PLAU, KDR                                             | 181        | 205      | 17535     | 2.362889099     | 1          | 0.94428615 | 94.3083713 |
| GOTERM_BP_DIRECT      | GO:0008284~positive regulation of cell proliferation         | 8     | 3.827751196 | 0.259535948 | CDKN1B, VEGFA, SPHK1, FASLG, HILPDA, ID3, PLAU, KDR                       | 181        | 503      | 17535     | 1.540810386     | 1          | 0.98126978 | 99.2723233 |
| Annotation Cluster 12 | Enrichment Score: 1.0461672697393714                         |       |             |             |                                                                           |            |          |           |                 |            |            |            |
| Category              | Term                                                         | Count | %           | PValue      | Genes                                                                     | List Total | Pop Hits | Pop Total | Fold Enrichment | Bonferroni | Benjamini  | FDR        |
| GOTERM_BP_DIRECT      | GO:0008203~cholesterol metabolic process                     | 4     | 1.913875598 | 0.025858274 | INSIG2, SQLE, INSIG1, VLDLR                                               | 181        | 62       | 17535     | 6.250222777     | 1          | 0.62204582 | 34.8995547 |
| UP_KEYWORDS           | Cholesterol metabolism                                       | 3     | 1.435406699 | 0.06440183  | INSIG2, INSIG1, VLDLR                                                     | 206        | 42       | 20793     | 7.209778086     | 0.99999873 | 0.38430537 | 56.7027492 |
| UP_KEYWORDS           | Sterol metabolism                                            | 3     | 1.435406699 | 0.081240553 | INSIG2, INSIG1, VLDLR                                                     | 206        | 48       | 20793     | 6.308555825     | 0.99999997 | 0.40772919 | 65.5429906 |
| UP_KEYWORDS           | Steroid metabolism                                           | 3     | 1.435406699 | 0.121508809 | INSIG2, INSIG1, VLDLR                                                     | 206        | 61       | 20793     | 4.964109502     | 1          | 0.5104518  | 80.3880644 |
| UP_KEYWORDS           | Lipid metabolism                                             | 5     | 2.392344498 | 0.357507597 | SLC27A1, INSIG2, INSIG1, CHPT1, VLDLR                                     | 206        | 306      | 20793     | 1.649295641     | 1          | 0.79470911 | 99.6162778 |
| Annotation Cluster 13 | Enrichment Score: 0.9831099722786809                         |       |             |             |                                                                           |            |          |           |                 |            |            |            |
| Category              | Term                                                         | Count | %           | PValue      | Genes                                                                     | List Total | Pop Hits | Pop Total | Fold Enrichment | Bonferroni | Benjamini  | FDR        |
| INTERPRO              | IPR013026:Tetratricopeptide repeat-containing domain         | 5     | 2.392344498 | 0.032953946 | P4HA2, P4HA1, ZC3H7B, KLC4, DNAJC3                                        | 199        | 118      | 19384     | 4.127416745     | 0.99999986 | 0.95742818 | 38.0281944 |
| INTERPRO              | IPR019734:Tetratricopeptide repeat                           | 5     | 2.392344498 | 0.036570229 | P4HA2, P4HA1, ZC3H7B, KLC4, DNAJC3                                        | 199        | 122      | 19384     | 3.992091606     | 0.99999998 | 0.94631229 | 41.2564468 |
| INTERPRO              | IPR011990:Tetratricopeptide-like helical                     | 5     | 2.392344498 | 0.149176857 | P4HA2, P4HA1, ZC3H7B, KLC4, DNAJC3                                        | 199        | 200      | 19384     | 2.435175879     | 1          | 0.99900952 | 90.0425693 |
| UP_KEYWORDS           | TPR repeat                                                   | 3     | 1.435406699 | 0.179538342 | P4HA1, KLC4, DNAJC3                                                       | 206        | 78       | 20793     | 3.8821882       | 1          | 0.61755513 | 91.6954253 |
| SMART                 | SM00028:TPR                                                  | 3     | 1.435406699 | 0.376319189 | ZC3H7B, KLC4, DNAJC3                                                      | 109        | 117      | 9680      | 2.277111268     | 1          | 0.99747154 | 99.5342192 |
| Annotation Cluster 14 | Enrichment Score: 0.796253214927415                          |       |             |             |                                                                           |            |          |           |                 |            |            |            |
| Category              | Term                                                         | Count | %           | PValue      | Genes                                                                     | List Total | Pop Hits | Pop Total | Fold Enrichment | Bonferroni | Benjamini  | FDR        |
| INTERPRO              | IPR001623:DnaJ domain                                        | 3     | 1.435406699 | 0.095653732 | DNAJB9, DNAJB1, DNAJC3                                                    | 199        | 51       | 19384     | 5.729825599     | 1          | 0.99731337 | 76.2049574 |
| SMART                 | SM00271:DnaJ                                                 | 3     | 1.435406699 | 0.099969472 | DNAJB9, DNAJB1, DNAJC3                                                    | 109        | 48       | 9680      | 5.550458716     | 0.9999939  | 0.95030286 | 69.8154848 |
| COG_ONTOLOGY          | Posttranslational modification, protein turnover, chaperones | 3     | 1.435406699 | 0.427239148 | DNAJB9, DNAJB1, DNAJC3                                                    | 22         | 119      | 1738      | 1.991596639     | 0.99875354 | 0.99875354 | 97.2274504 |
| Annotation Cluster 15 | Enrichment Score: 0.7895876289108528                         |       |             |             |                                                                           |            |          |           |                 |            |            |            |
| Category              | Term                                                         | Count | %           | PValue      | Genes                                                                     | List Total | Pop Hits | Pop Total | Fold Enrichment | Bonferroni | Benjamini  | FDR        |

|                       |                                                                  |       |             |             |                                                                                                     |            |          |           |                 |            |            |            |
|-----------------------|------------------------------------------------------------------|-------|-------------|-------------|-----------------------------------------------------------------------------------------------------|------------|----------|-----------|-----------------|------------|------------|------------|
| UP_KEYWORDS           | Transcription                                                    | 15    | 7.177033493 | 0.052972451 | MAFF, LRIF1, FASLG, NR4A3, FOXO3, IL33, FOXO4, GZF1, JMJD6, KDM3A, HBP1, BHLHE40, VOPP1, ID3, NFIL3 | 206        | 878      | 20793     | 1.724434394     | 0.99998493 | 0.38291264 | 49.5606693 |
| UP_KEYWORDS           | Repressor                                                        | 6     | 2.870813397 | 0.057401823 | FASLG, HBP1, ID3, BHLHE40, NFIL3, GZF1                                                              | 206        | 210      | 20793     | 2.883911234     | 0.99999421 | 0.37112762 | 52.4481722 |
| UP_KEYWORDS           | Transcription regulation                                         | 12    | 5.741626794 | 0.196816319 | MAFF, LRIF1, JMJD6, FASLG, KDM3A, HBP1, ID3, NR4A3, BHLHE40, VOPP1, NFIL3, GZF1                     | 206        | 829      | 20793     | 1.461088925     | 1          | 0.63801785 | 93.6454448 |
| GOTERM_BP_DIRECT      | GO:0006351~transcription, DNA-templated                          | 11    | 5.263157895 | 0.2911622   | LRIF1, JMJD6, FASLG, KDM3A, HBP1, ID3, BHLHE40, VOPP1, IL33, FOXO4, GZF1                            | 181        | 788      | 17535     | 1.352364192     | 1          | 0.98697083 | 99.6440877 |
| GOTERM_BP_DIRECT      | GO:0006355~regulation of transcription, DNA-templated            | 11    | 5.263157895 | 0.646978733 | PRKCQ, ACVRL1, LRIF1, JMJD6, MNT, KDM3A, HBP1, VOPP1, FOXO3, FOXO4, MLLT3                           | 181        | 1054     | 17535     | 1.011065449     | 1          | 0.99997371 | 99.9999961 |
| Annotation Cluster 16 | Enrichment Score: 0.7736176964794167                             |       |             |             |                                                                                                     |            |          |           |                 |            |            |            |
| Category              | Term                                                             | Count | %           | PValue      | Genes                                                                                               | List Total | Pop Hits | Pop Total | Fold Enrichment | Bonferroni | Benjamini  | FDR        |
| GOTERM_CC_DIRECT      | GO:0005578~proteinaceous extracellular matrix                    | 7     | 3.349282297 | 0.046236352 | ADAMTS9, FBLN1, WNT4, MMP9, KAZALD1, VWA1, MMP12                                                    | 191        | 253      | 18520     | 2.682780457     | 0.99995823 | 0.67383943 | 45.0894641 |
| UP_KEYWORDS           | Protease                                                         | 8     | 3.827751196 | 0.14202623  | SCPEP1, CASP6, CPM, ADAMTS9, MMP9, PREPL, PLAU, MMP12                                               | 206        | 437      | 20793     | 1.847814979     | 1          | 0.56059957 | 85.4299076 |
| INTERPRO              | IPR024079:Metallopeptidase, catalytic domain                     | 3     | 1.435406699 | 0.234357803 | ADAMTS9, MMP9, MMP12                                                                                | 199        | 90       | 19384     | 3.246901173     | 1          | 0.99977175 | 97.7922038 |
| UP_KEYWORDS           | Metalloprotease                                                  | 3     | 1.435406699 | 0.259006526 | ADAMTS9, MMP9, MMP12                                                                                | 206        | 100      | 20793     | 3.028106796     | 1          | 0.69852068 | 97.6934229 |
| GOTERM_MF_DIRECT      | GO:0004222~metalloendopeptidase activity                         | 3     | 1.435406699 | 0.339914173 | ADAMTS9, MMP9, MMP12                                                                                | 174        | 116      | 16650     | 2.474732461     | 1          | 0.98988437 | 99.6790468 |
| Annotation Cluster 17 | Enrichment Score: 0.6180740779887289                             |       |             |             |                                                                                                     |            |          |           |                 |            |            |            |
| Category              | Term                                                             | Count | %           | PValue      | Genes                                                                                               | List Total | Pop Hits | Pop Total | Fold Enrichment | Bonferroni | Benjamini  | FDR        |
| INTERPRO              | IPR000198:Rho GTPase-activating protein domain                   | 3     | 1.435406699 | 0.178473156 | DLC1, BCR, ARHGAP8                                                                                  | 199        | 75       | 19384     | 3.896281407     | 1          | 0.99865837 | 93.9625989 |
| SMART                 | SM00324:RhoGAP                                                   | 3     | 1.435406699 | 0.195762435 | DLC1, BCR, ARHGAP8                                                                                  | 109        | 73       | 9680      | 3.64961669      | 1          | 0.98406681 | 91.605968  |
| INTERPRO              | IPR008936:Rho GTPase activation protein                          | 3     | 1.435406699 | 0.264610022 | DLC1, BCR, ARHGAP8                                                                                  | 199        | 98       | 19384     | 2.981848016     | 1          | 0.99967848 | 98.7584818 |
| GOTERM_MF_DIRECT      | GO:0005096~GTPase activator activity                             | 4     | 1.913875598 | 0.364581928 | DLC1, BCR, ACAP1, ARHGAP8                                                                           | 174        | 207      | 16650     | 1.849075462     | 1          | 0.99003082 | 99.8104136 |
| Annotation Cluster 18 | Enrichment Score: 0.49441805344876066                            |       |             |             |                                                                                                     |            |          |           |                 |            |            |            |
| Category              | Term                                                             | Count | %           | PValue      | Genes                                                                                               | List Total | Pop Hits | Pop Total | Fold Enrichment | Bonferroni | Benjamini  | FDR        |
| INTERPRO              | IPR009030:Insulin-like growth factor binding protein, N-terminal | 4     | 1.913875598 | 0.143243958 | FBLN1, EFEMP2, KAZALD1, VLDLR                                                                       | 199        | 128      | 19384     | 3.043969849     | 1          | 0.99931202 | 89.0038457 |
| UP_KEYWORDS           | EGF-like domain                                                  | 4     | 1.913875598 | 0.232790067 | FBLN1, EFEMP2, PLAU, VLDLR                                                                          | 206        | 169      | 20793     | 2.389038892     | 1          | 0.67574594 | 96.4285684 |
| INTERPRO              | IPR018097:EGF-like calcium-binding, conserved site               | 3     | 1.435406699 | 0.249469222 | FBLN1, EFEMP2, VLDLR                                                                                | 199        | 94       | 19384     | 3.108735165     | 1          | 0.99978563 | 98.3391241 |
| INTERPRO              | IPR000152:EGF-type aspartate/asparagine hydroxylation site       | 3     | 1.435406699 | 0.253252747 | FBLN1, EFEMP2, VLDLR                                                                                | 199        | 95       | 19384     | 3.076011637     | 1          | 0.99969369 | 98.4547608 |
| INTERPRO              | IPR013032:EGF-like, conserved site                               | 4     | 1.913875598 | 0.304371264 | FBLN1, EFEMP2, PLAU, VLDLR                                                                          | 199        | 189      | 19384     | 2.061524554     | 1          | 0.99980592 | 99.4386346 |
| INTERPRO              | IPR001881:EGF-like calcium-binding                               | 3     | 1.435406699 | 0.351020098 | FBLN1, EFEMP2, VLDLR                                                                                | 199        | 121      | 19384     | 2.415050459     | 1          | 0.99970997 | 99.7916588 |
| INTERPRO              | IPR000742:Epidermal growth factor-like domain                    | 4     | 1.913875598 | 0.382246513 | FBLN1, EFEMP2, PLAU, VLDLR                                                                          | 199        | 217      | 19384     | 1.795521386     | 1          | 0.99983762 | 99.8969693 |
| SMART                 | SM00179:EGF_CA                                                   | 3     | 1.435406699 | 0.392220733 | FBLN1, EFEMP2, VLDLR                                                                                | 109        | 121      | 9680      | 2.201834862     | 1          | 0.99657467 | 99.6527675 |
| SMART                 | SM00181:EGF                                                      | 3     | 1.435406699 | 0.572196045 | FBLN1, EFEMP2, VLDLR                                                                                | 109        | 171      | 9680      | 1.558023499     | 1          | 0.99941615 | 99.9935985 |

|                       |                                                  |       |             |             |                                                                                                               |            |          |           |                 |            |            |            |
|-----------------------|--------------------------------------------------|-------|-------------|-------------|---------------------------------------------------------------------------------------------------------------|------------|----------|-----------|-----------------|------------|------------|------------|
| GOTERM_MF_DIRECT      | GO:0005509~calcium ion binding                   | 8     | 3.827751196 | 0.588915531 | GUCA1A, CBLB, FBLN1, EFEMP2, ACTN1, DST, MMP12, VLDLR                                                         | 174        | 696      | 16650     | 1.099881094     | 1          | 0.99918445 | 99.9995391 |
| Annotation Cluster 19 | Enrichment Score: 0.4724266150688843             |       |             |             |                                                                                                               |            |          |           |                 |            |            |            |
| Category              | Term                                             | Count | %           | PValue      | Genes                                                                                                         | List Total | Pop Hits | Pop Total | Fold Enrichment | Bonferroni | Benjamini  | FDR        |
| SMART                 | SM00184:RING                                     | 5     | 2.392344498 | 0.211808037 | RNF125, CBLB, MEX3B, RNF138, HLTf                                                                             | 109        | 212      | 9680      | 2.094512723     | 1          | 0.979271   | 93.3252763 |
| UP_KEYWORDS           | Zinc-finger                                      | 12    | 5.741626794 | 0.217884813 | RNF125, PRKCQ, CBLB, MEX3B, ZMYND10, RYBP, KDM4B, RNF138, KDM3A, NR4A3, DTNA, GZF1                            | 206        | 849      | 20793     | 1.426669869     | 1          | 0.65584863 | 95.4509364 |
| UP_KEYWORDS           | Zinc                                             | 16    | 7.655502392 | 0.247389427 | ZMYND10, MMP9, MEX3B, RYBP, NR4A3, MMP12, GZF1, RNF125, HAGH, PRKCQ, CBLB, ZFP185, KDM4B, RNF138, KDM3A, DTNA | 206        | 1245     | 20793     | 1.297180957     | 1          | 0.69371236 | 97.1950759 |
| UP_KEYWORDS           | Ligase                                           | 4     | 1.913875598 | 0.280558241 | SLC27A1, CBLB, WWP1, RNF138                                                                                   | 206        | 187      | 20793     | 2.159077929     | 1          | 0.71844183 | 98.408607  |
| INTERPRO              | IPR001841:Zinc finger, RING-type                 | 5     | 2.392344498 | 0.281419186 | RNF125, CBLB, MEX3B, RNF138, HLTf                                                                             | 199        | 261      | 19384     | 1.866035157     | 1          | 0.99972324 | 99.107603  |
| GOTERM_MF_DIRECT      | GO:0008270~zinc ion binding                      | 14    | 6.698564593 | 0.301518326 | RNF125, CBLB, CPM, ADAMTS9, MMP9, MEX3B, RYBP, KDM4B, ZFP185, RNF138, NR4A3, HLTf, MMP12, DTNA                | 174        | 1054     | 16650     | 1.271020088     | 1          | 0.98712488 | 99.2987938 |
| GOTERM_MF_DIRECT      | GO:0061630~ubiquitin protein ligase activity     | 4     | 1.913875598 | 0.339126918 | CBLB, WWP1, RNF138, HLTf                                                                                      | 174        | 198      | 16650     | 1.933124347     | 1          | 0.99107854 | 99.6737151 |
| GOTERM_MF_DIRECT      | GO:0016874~ligase activity                       | 3     | 1.435406699 | 0.347472615 | CBLB, WWP1, RNF138                                                                                            | 174        | 118      | 16650     | 2.432787843     | 1          | 0.98842324 | 99.72628   |
| INTERPRO              | IPR013083:Zinc finger, RING/FYVE/PHD-type        | 6     | 2.870813397 | 0.412625749 | RNF125, CBLB, MEX3B, KDM4B, RNF138, HLTf                                                                      | 199        | 414      | 19384     | 1.411696162     | 1          | 0.99969168 | 99.9498531 |
| INTERPRO              | IPR017907:Zinc finger, RING-type, conserved site | 3     | 1.435406699 | 0.437323852 | RNF125, CBLB, HLTf                                                                                            | 199        | 145      | 19384     | 2.015317969     | 1          | 0.99978908 | 99.9728455 |
| GOTERM_BP_DIRECT      | GO:0016567~protein ubiquitination                | 5     | 2.392344498 | 0.483009787 | RNF125, CBLB, SPSB1, WWP1, RNF138                                                                             | 181        | 349      | 17535     | 1.387943453     | 1          | 0.99908856 | 99.9979786 |
| UP_KEYWORDS           | Ubl conjugation pathway                          | 3     | 1.435406699 | 0.767434603 | CBLB, WWP1, RNF138                                                                                            | 206        | 281      | 20793     | 1.077618077     | 1          | 0.98206428 | 99.9999989 |
| Annotation Cluster 20 | Enrichment Score: 0.4686337683903179             |       |             |             |                                                                                                               |            |          |           |                 |            |            |            |
| Category              | Term                                             | Count | %           | PValue      | Genes                                                                                                         | List Total | Pop Hits | Pop Total | Fold Enrichment | Bonferroni | Benjamini  | FDR        |
| UP_KEYWORDS           | Sodium transport                                 | 3     | 1.435406699 | 0.251702027 | SLC6A8, ASIC1, SLC22A5                                                                                        | 206        | 98       | 20793     | 3.089904894     | 1          | 0.69364552 | 97.3906154 |
| UP_KEYWORDS           | Sodium                                           | 3     | 1.435406699 | 0.26996763  | SLC6A8, ASIC1, SLC22A5                                                                                        | 206        | 103      | 20793     | 2.939909511     | 1          | 0.70900829 | 98.0875864 |
| UP_KEYWORDS           | Ion transport                                    | 6     | 2.870813397 | 0.577963334 | CLCN3, LRRC8A, SLC6A8, ASIC1, SLC22A5, KCTD11                                                                 | 206        | 516      | 20793     | 1.173684805     | 1          | 0.93049893 | 99.998055  |
| Annotation Cluster 21 | Enrichment Score: 0.454903740797684              |       |             |             |                                                                                                               |            |          |           |                 |            |            |            |
| Category              | Term                                             | Count | %           | PValue      | Genes                                                                                                         | List Total | Pop Hits | Pop Total | Fold Enrichment | Bonferroni | Benjamini  | FDR        |
| INTERPRO              | IPR013151:Immunoglobulin                         | 3     | 1.435406699 | 0.098836821 | IL1R2, CD200, KDR                                                                                             | 199        | 52       | 19384     | 5.619636645     | 1          | 0.99568766 | 77.3733498 |
| UP_SEQ_FEATURE        | domain:Ig-like C2-type 3                         | 3     | 1.435406699 | 0.158593522 | IL1R2, IL1RAP, KDR                                                                                            | 108        | 53       | 7976      | 4.180293501     | 1          | 0.99908222 | 91.044572  |
| UP_SEQ_FEATURE        | domain:Ig-like C2-type 2                         | 3     | 1.435406699 | 0.261503815 | IL1R2, IL1RAP, KDR                                                                                            | 108        | 74       | 7976      | 2.993993994     | 1          | 0.99984458 | 98.5532471 |
| UP_SEQ_FEATURE        | domain:Ig-like C2-type 1                         | 3     | 1.435406699 | 0.261503815 | IL1R2, IL1RAP, KDR                                                                                            | 108        | 74       | 7976      | 2.993993994     | 1          | 0.99984458 | 98.5532471 |
| INTERPRO              | IPR013783:Immunoglobulin-like fold               | 10    | 4.784688995 | 0.340247449 | IL1R2, IL2RB, GBE1, KAZALD1, IL1RAP, VSIR, STBD1, VWA1, CD200, KDR                                            | 199        | 737      | 19384     | 1.321669405     | 1          | 0.99971467 | 99.7364456 |

|                       |                                                                     |       |             |             |                                                           |            |          |           |                 |            |            |            |
|-----------------------|---------------------------------------------------------------------|-------|-------------|-------------|-----------------------------------------------------------|------------|----------|-----------|-----------------|------------|------------|------------|
| INTERPRO              | IPR003599:Immunoglobulin subtype                                    | 6     | 2.870813397 | 0.388189596 | IL1R2, KAZALD1, IL1RAP, VSIR, CD200, KDR                  | 199        | 401      | 19384     | 1.457461873     | 1          | 0.99981048 | 99.9102536 |
| UP_KEYWORDS           | Immunoglobulin domain                                               | 4     | 1.913875598 | 0.46071788  | IL1R2, IL1RAP, CD200, KDR                                 | 206        | 255      | 20793     | 1.583323815     | 1          | 0.88177215 | 99.957568  |
| SMART                 | SM00409:IG                                                          | 6     | 2.870813397 | 0.465321644 | IL1R2, KAZALD1, IL1RAP, VSIR, CD200, KDR                  | 109        | 401      | 9680      | 1.328788121     | 1          | 0.99847928 | 99.919147  |
| INTERPRO              | IPR003598:Immunoglobulin subtype 2                                  | 3     | 1.435406699 | 0.672030763 | IL1R2, KAZALD1, KDR                                       | 199        | 225      | 19384     | 1.298760469     | 1          | 0.99999801 | 99.9999878 |
| INTERPRO              | IPR007110:Immunoglobulin-like domain                                | 6     | 2.870813397 | 0.674624314 | IL1R2, KAZALD1, IL1RAP, VSIR, CD200, KDR                  | 199        | 556      | 19384     | 1.051155056     | 1          | 0.9999966  | 99.9999891 |
| SMART                 | SM00408:IGc2                                                        | 3     | 1.435406699 | 0.720145663 | IL1R2, KAZALD1, KDR                                       | 109        | 225      | 9680      | 1.184097859     | 1          | 0.99988535 | 99.9999487 |
| Annotation Cluster 22 | Enrichment Score: 0.4145510870125015                                |       |             |             |                                                           |            |          |           |                 |            |            |            |
| Category              | Term                                                                | Count | %           | PValue      | Genes                                                     | List Total | Pop Hits | Pop Total | Fold Enrichment | Bonferroni | Benjamini  | FDR        |
| INTERPRO              | IPR011598:Myc-type, basic helix-loop-helix (bHLH) domain            | 3     | 1.435406699 | 0.317467261 | MNT, ID3, BHLHE40                                         | 199        | 112      | 19384     | 2.609117014     | 1          | 0.99971898 | 99.5720598 |
| SMART                 | SM00353:HLH                                                         | 3     | 1.435406699 | 0.344043389 | MNT, ID3, BHLHE40                                         | 109        | 109      | 9680      | 2.4442387       | 1          | 0.99754263 | 99.1732253 |
| GOTERM_MF_DIRECT      | GO:0046983~protein dimerization activity                            | 3     | 1.435406699 | 0.522437782 | MNT, ID3, BHLHE40                                         | 174        | 170      | 16650     | 1.688640974     | 1          | 0.99886114 | 99.9963405 |
| Annotation Cluster 23 | Enrichment Score: 0.3764170409833939                                |       |             |             |                                                           |            |          |           |                 |            |            |            |
| Category              | Term                                                                | Count | %           | PValue      | Genes                                                     | List Total | Pop Hits | Pop Total | Fold Enrichment | Bonferroni | Benjamini  | FDR        |
| INTERPRO              | IPR001245:Serine-threonine/tyrosine-protein kinase catalytic domain | 4     | 1.913875598 | 0.162607411 | ACVRL1, ZAP70, KSR1, KDR                                  | 199        | 136      | 19384     | 2.864912799     | 1          | 0.99905601 | 92.0663315 |
| GOTERM_BP_DIRECT      | GO:0006468~protein phosphorylation                                  | 8     | 3.827751196 | 0.256404461 | PDK1, PRKCQ, ACVRL1, PRKAG2, MAP3K8, ZAP70, KSR1, EIF2AK4 | 181        | 501      | 17535     | 1.546961326     | 1          | 0.98095536 | 99.2202287 |
| GOTERM_BP_DIRECT      | GO:0046777~protein autophosphorylation                              | 4     | 1.913875598 | 0.297473384 | BCR, ZAP70, EIF2AK4, KDR                                  | 181        | 186      | 17535     | 2.083407592     | 1          | 0.98736015 | 99.6925987 |
| KEGG_PATHWAY          | rno04660:T cell receptor signaling pathway                          | 3     | 1.435406699 | 0.340432943 | PRKCQ, MAP3K8, ZAP70                                      | 90         | 105      | 7749      | 2.46            | 1          | 0.82109958 | 99.3172529 |
| UP_SEQ_FEATURE        | binding site:ATP                                                    | 6     | 2.870813397 | 0.341105313 | PDK1, PRKCQ, ACVRL1, MAP3K8, PGK1, KDR                    | 108        | 287      | 7976      | 1.543941154     | 1          | 0.99995174 | 99.7060546 |
| INTERPRO              | IPR000719:Protein kinase, catalytic domain                          | 7     | 3.349282297 | 0.401159962 | PRKCQ, ACVRL1, MAP3K8, ZAP70, KSR1, EIF2AK4, KDR          | 199        | 499      | 19384     | 1.366431355     | 1          | 0.99982051 | 99.9339105 |
| INTERPRO              | IPR008271:Serine/threonine-protein kinase, active site              | 5     | 2.392344498 | 0.411628878 | PRKCQ, ACVRL1, MAP3K8, KSR1, EIF2AK4                      | 199        | 319      | 19384     | 1.526756037     | 1          | 0.99975816 | 99.9486241 |
| INTERPRO              | IPR011009:Protein kinase-like domain                                | 7     | 3.349282297 | 0.466607829 | PRKCQ, ACVRL1, MAP3K8, ZAP70, KSR1, EIF2AK4, KDR          | 199        | 540      | 19384     | 1.262683789     | 1          | 0.9998345  | 99.9873413 |
| UP_KEYWORDS           | Serine/threonine-protein kinase                                     | 4     | 1.913875598 | 0.498248343 | PRKCQ, ACVRL1, MAP3K8, EIF2AK4                            | 206        | 270      | 20793     | 1.495361381     | 1          | 0.90037782 | 99.9828696 |
| INTERPRO              | IPR017441:Protein kinase, ATP binding site                          | 5     | 2.392344498 | 0.542792219 | PRKCQ, ACVRL1, ZAP70, EIF2AK4, KDR                        | 199        | 379      | 19384     | 1.285053235     | 1          | 0.99993874 | 99.9985984 |
| GOTERM_MF_DIRECT      | GO:0004672~protein kinase activity                                  | 4     | 1.913875598 | 0.555231528 | PDK1, MAP3K8, ZAP70, KSR1                                 | 174        | 278      | 16650     | 1.376829571     | 1          | 0.99885194 | 99.9986311 |
| UP_SEQ_FEATURE        | active site:Proton acceptor                                         | 6     | 2.870813397 | 0.570406022 | PRKCQ, ACVRL1, PFKL, ALDOC, MAP3K8, KDR                   | 108        | 375      | 7976      | 1.18162963      | 1          | 0.99999998 | 99.9992542 |
| SMART                 | SM00220:S_TKc                                                       | 5     | 2.392344498 | 0.605055764 | PRKCQ, ACVRL1, MAP3K8, KSR1, EIF2AK4                      | 109        | 374      | 9680      | 1.187263896     | 1          | 0.99914164 | 99.9974204 |
| UP_SEQ_FEATURE        | domain:Protein kinase                                               | 4     | 1.913875598 | 0.612501547 | PRKCQ, ACVRL1, MAP3K8, KDR                                | 108        | 234      | 7976      | 1.262424818     | 1          | 1          | 99.9998235 |
| GOTERM_MF_DIRECT      | GO:0004674~protein serine/threonine kinase activity                 | 4     | 1.913875598 | 0.641053929 | PDK1, PRKCQ, ACVRL1, EIF2AK4                              | 174        | 316      | 16650     | 1.211261458     | 1          | 0.99947588 | 99.9999293 |
| Annotation Cluster 24 | Enrichment Score: 0.3375024849885026                                |       |             |             |                                                           |            |          |           |                 |            |            |            |
| Category              | Term                                                                | Count | %           | PValue      | Genes                                                     | List Total | Pop Hits | Pop Total | Fold Enrichment | Bonferroni | Benjamini  | FDR        |



|                  |                                                  |    |             |             |                                                                                                                                                                                                                                                                                                                                                                                                                                                                                        |     |      |       |             |   |            |            |
|------------------|--------------------------------------------------|----|-------------|-------------|----------------------------------------------------------------------------------------------------------------------------------------------------------------------------------------------------------------------------------------------------------------------------------------------------------------------------------------------------------------------------------------------------------------------------------------------------------------------------------------|-----|------|-------|-------------|---|------------|------------|
| UP_SEQ_FEATURE   | topological domain:Extracellular                 | 22 | 10.52631579 | 0.116688592 | RAMP3, IL1R2, SLC27A1, IL2RB, ACVRL1, LRRC8A, FASLG, ASIC1, GPR1, KDR, SLC16A3, SLC6A8, TSPAN31, SLC2A1, IL1RAP, SLC22A5, STBD1, ENTPD2, CD200, CR1L, HIGD1A, VLDLR                                                                                                                                                                                                                                                                                                                    | 108 | 1199 | 7976  | 1.35507985  | 1 | 0.99812926 | 82.3382388 |
| UP_SEQ_FEATURE   | transmembrane region                             | 34 | 16.26794258 | 0.218243631 | SLC27A1, IL1R2, TSPO, CLCN3, ACVRL1, LRRC8A, FASLG, COMT, GPR1, INSIG2, TSPAN31, INSIG1, IL1RAP, SLC2A1, SEC22B, SLC22A5, ENTPD2, HIGD1A, RAMP3, IL2RB, ASIC1, CHPT1, KDR, SLC16A3, PARP16, SQLE, SLC6A8, SLC35E1, SURF4, LOC691807, STBD1, CD200, CR1L, VLDLR                                                                                                                                                                                                                         | 108 | 2160 | 7976  | 1.162482853 | 1 | 0.99988437 | 96.7947792 |
| UP_SEQ_FEATURE   | topological domain:Cytoplasmic                   | 25 | 11.96172249 | 0.239009014 | RAMP3, SLC27A1, IL1R2, IL2RB, CLCN3, ACVRL1, LRRC8A, FASLG, ASIC1, GPR1, KDR, SLC16A3, SLC6A8, TSPAN31, SLC2A1, IL1RAP, INSIG1, SEC22B, SLC22A5, STBD1, CD200, ENTPD2, CR1L, HIGD1A, VLDLR                                                                                                                                                                                                                                                                                             | 108 | 1541 | 7976  | 1.198115702 | 1 | 0.99990079 | 97.7996912 |
| GOTERM_CC_DIRECT | GO:0005887~integral component of plasma membrane | 12 | 5.741626794 | 0.373631849 | SLC16A3, ACVRL1, TSPAN33, SLC6A8, TSPAN31, SLC2A1, ASIC1, SLC22A5, PLPP1, GPR1, CD200, KDR                                                                                                                                                                                                                                                                                                                                                                                             | 191 | 942  | 18520 | 1.235201921 | 1 | 0.94664224 | 99.7325596 |
| UP_KEYWORDS      | Membrane                                         | 64 | 30.62200957 | 0.914463911 | DLC1, SLC27A1, TSPO, ACVRL1, LRRC8A, EFNA1, BNIP3, FASLG, CDCP1, INSIG2, PLOD2, TMEM59, SLC2A1, IL1RAP, INSIG1, PHTF1, GNG2, SLC22A5, HIGD1A, RAMP3, ACTN1, BASP1, ARDC3, CHPT1, PARP16, PRKCQ, SQLE, SLC25A36, VSIR, SLC35E1, SURF4, VOPP1, STBD1, RASD1, CR1L, IL1R2, CLCN3, FCNA, COMT, PLPP1, GPR1, FAM65B, TOMM7, TSPAN33, ERO1A, TSPAN31, SEC22B, NDRG1, ENTPD4, ENTPD2, IL2RB, DNM1L, SPHK1, XKR8, ATP11B, HILPDA, ASIC1, KDR, SLC16A3, SLC6A8, BNIP3L, LOC691807, CD200, VLDLR | 206 | 7278 | 20793 | 0.887601149 | 1 | 0.99779506 | 100        |

|                       |                                           |       |             |             |                                                                                                                                                                                                                                                                                                                                                                                 |            |          |           |                 |            |            |            |
|-----------------------|-------------------------------------------|-------|-------------|-------------|---------------------------------------------------------------------------------------------------------------------------------------------------------------------------------------------------------------------------------------------------------------------------------------------------------------------------------------------------------------------------------|------------|----------|-----------|-----------------|------------|------------|------------|
| UP_KEYWORDS           | Transmembrane helix                       | 49    | 23.44497608 | 0.982304201 | SLC27A1, IL1R2, TSPO, CLCN3, ACVRL1, LRRC8A, BNIP3, FASLG, CDCP1, COMT, PLPP1, GPR1, TOMM7, TSPAN33, INSIG2, TMEM59, TSPAN31, SLC2A1, IL1RAP, INSIG1, PHTF1, SEC22B, SLC22A5, ENTPD4, ENTPD2, HIGD1A, RAMP3, IL2RB, XKR8, ATP11B, HILPDA, ASIC1, CHPT1, KDR, SLC16A3, PARP16, SQLE, SLC6A8, SLC25A36, BNIP3L, VSIR, SLC35E1, SURF4, VOPP1, LOC691807, STBD1, CD200, CR1L, VLDLR | 206        | 6182     | 20793     | 0.800049784     | 1          | 0.99995062 | 100        |
| UP_KEYWORDS           | Transmembrane                             | 49    | 23.44497608 | 0.983914828 | SLC27A1, IL1R2, TSPO, CLCN3, ACVRL1, LRRC8A, BNIP3, FASLG, CDCP1, COMT, PLPP1, GPR1, TOMM7, TSPAN33, INSIG2, TMEM59, TSPAN31, SLC2A1, IL1RAP, INSIG1, PHTF1, SEC22B, SLC22A5, ENTPD4, ENTPD2, HIGD1A, RAMP3, IL2RB, XKR8, ATP11B, HILPDA, ASIC1, CHPT1, KDR, SLC16A3, PARP16, SQLE, SLC6A8, SLC25A36, BNIP3L, VSIR, SLC35E1, SURF4, VOPP1, LOC691807, STBD1, CD200, CR1L, VLDLR | 206        | 6208     | 20793     | 0.79669906      | 1          | 0.99995593 | 100        |
| GOTERM_CC_DIRECT      | GO:0016021~integral component of membrane | 45    | 21.53110048 | 0.992617426 | SLC27A1, IL1R2, TSPO, CLCN3, BNIP3, ACP5, FASLG, CDCP1, COMT, PLPP1, GPR1, TMEM59, SLC2A1, IL1RAP, INSIG1, PHTF1, SEC22B, SLC22A5, ENTPD4, ENTPD2, HIGD1A, RAMP3, IL2RB, XKR8, ATP11B, HILPDA, ASIC1, CHPT1, KDR, PARP16, IFI27, SYNE1, SQLE, SLC25A36, IFI27L2B, BNIP3L, VSIR, SLC35E1, SURF4, LOC691807, SLC27A3, STBD1, CD200, CR1L, VLDLR                                   | 191        | 5711     | 18520     | 0.764025702     | 1          | 0.99999996 | 100        |
| Annotation Cluster 25 | Enrichment Score: 0.31897798257692345     |       |             |             |                                                                                                                                                                                                                                                                                                                                                                                 |            |          |           |                 |            |            |            |
| Category              | Term                                      | Count | %           | PValue      | Genes                                                                                                                                                                                                                                                                                                                                                                           | List Total | Pop Hits | Pop Total | Fold Enrichment | Bonferroni | Benjamini  | FDR        |
| INTERPRO              | IPR011333:BTB/POZ fold                    | 4     | 1.913875598 | 0.323411271 | RCBTB1, BCL6, KCTD11, GZF1                                                                                                                                                                                                                                                                                                                                                      | 199        | 194      | 19384     | 2.008392478     | 1          | 0.99966477 | 99.6223065 |
| INTERPRO              | IPR000210:BTB/POZ-like                    | 3     | 1.435406699 | 0.565927722 | RCBTB1, BCL6, GZF1                                                                                                                                                                                                                                                                                                                                                              | 199        | 185      | 19384     | 1.579573543     | 1          | 0.99995804 | 99.9993323 |
| SMART                 | SM00225:BTB                               | 3     | 1.435406699 | 0.603323071 | RCBTB1, BCL6, GZF1                                                                                                                                                                                                                                                                                                                                                              | 109        | 181      | 9680      | 1.471944853     | 1          | 0.99946281 | 99.9972888 |
| Annotation Cluster 26 | Enrichment Score: 0.2957409272924174      |       |             |             |                                                                                                                                                                                                                                                                                                                                                                                 |            |          |           |                 |            |            |            |
| Category              | Term                                      | Count | %           | PValue      | Genes                                                                                                                                                                                                                                                                                                                                                                           | List Total | Pop Hits | Pop Total | Fold Enrichment | Bonferroni | Benjamini  | FDR        |

|                       |                                                                                          |       |             |             |                                                       |            |          |           |                 |            |            |            |
|-----------------------|------------------------------------------------------------------------------------------|-------|-------------|-------------|-------------------------------------------------------|------------|----------|-----------|-----------------|------------|------------|------------|
| INTERPRO              | IPR011992:EF-hand-like domain                                                            | 5     | 2.392344498 | 0.314029506 | GUCA1A, CBLB, ACTN1, DST, DTNA                        | 199        | 277      | 19384     | 1.758249732     | 1          | 0.99978691 | 99.5402307 |
| SMART                 | SM00054:EFh                                                                              | 3     | 1.435406699 | 0.490601774 | GUCA1A, ACTN1, DST                                    | 109        | 147      | 9680      | 1.812394683     | 1          | 0.99835166 | 99.9533909 |
| INTERPRO              | IPR018247:EF-Hand 1, calcium-binding site                                                | 3     | 1.435406699 | 0.542784762 | GUCA1A, ACTN1, DST                                    | 199        | 178      | 19384     | 1.641691604     | 1          | 0.99995286 | 99.9985981 |
| GOTERM_MF_DIRECT      | GO:0005509~calcium ion binding                                                           | 8     | 3.827751196 | 0.588915531 | GUCA1A, CBLB, FBLN1, EFEMP2, ACTN1, DST, MMP12, VLDLR | 174        | 696      | 16650     | 1.099881094     | 1          | 0.99918445 | 99.9995391 |
| INTERPRO              | IPR002048:EF-hand domain                                                                 | 3     | 1.435406699 | 0.674396238 | GUCA1A, ACTN1, DST                                    | 199        | 226      | 19384     | 1.293013741     | 1          | 0.99999748 | 99.999989  |
| Annotation Cluster 27 | Enrichment Score: 0.29468093984559085                                                    |       |             |             |                                                       |            |          |           |                 |            |            |            |
| Category              | Term                                                                                     | Count | %           | PValue      | Genes                                                 | List Total | Pop Hits | Pop Total | Fold Enrichment | Bonferroni | Benjamini  | FDR        |
| GOTERM_CC_DIRECT      | GO:0005874~microtubule                                                                   | 4     | 1.913875598 | 0.429548315 | TPGS2, DNMI1L, KLC4, NDRG1                            | 191        | 236      | 18520     | 1.643446623     | 1          | 0.95699266 | 99.9181597 |
| UP_KEYWORDS           | Microtubule                                                                              | 3     | 1.435406699 | 0.487898345 | TPGS2, KLC4, NDRG1                                    | 206        | 166      | 20793     | 1.824160721     | 1          | 0.8972431  | 99.9778553 |
| UP_KEYWORDS           | Cytoskeleton                                                                             | 6     | 2.870813397 | 0.623183313 | TPGS2, ZMYND10, MLLT11, KLC4, ACTN1, NDRG1            | 206        | 543      | 20793     | 1.115324787     | 1          | 0.94649549 | 99.9995323 |
| Annotation Cluster 28 | Enrichment Score: 0.27721793909155346                                                    |       |             |             |                                                       |            |          |           |                 |            |            |            |
| Category              | Term                                                                                     | Count | %           | PValue      | Genes                                                 | List Total | Pop Hits | Pop Total | Fold Enrichment | Bonferroni | Benjamini  | FDR        |
| GOTERM_BP_DIRECT      | GO:0006366~transcription from RNA polymerase II promoter                                 | 6     | 2.870813397 | 0.388117253 | MAFF, BCL11A, NR4A3, FOXO3, NFIL3, HLTF               | 181        | 398      | 17535     | 1.460479192     | 1          | 0.99560689 | 99.9680296 |
| GOTERM_MF_DIRECT      | GO:0043565~sequence-specific DNA binding                                                 | 7     | 3.349282297 | 0.541721961 | MAFF, BCL11A, BCL6, NR4A3, FOXO3, FOXO4, GZF1         | 174        | 568      | 16650     | 1.179273919     | 1          | 0.99891145 | 99.9979299 |
| GOTERM_MF_DIRECT      | GO:0000978~RNA polymerase II core promoter proximal region sequence-specific DNA binding | 4     | 1.913875598 | 0.700820492 | BCL11A, NR4A3, HLTF, GZF1                             | 174        | 346      | 16650     | 1.106238788     | 1          | 0.99965087 | 99.9999943 |
| Annotation Cluster 29 | Enrichment Score: 0.22230589872411322                                                    |       |             |             |                                                       |            |          |           |                 |            |            |            |
| Category              | Term                                                                                     | Count | %           | PValue      | Genes                                                 | List Total | Pop Hits | Pop Total | Fold Enrichment | Bonferroni | Benjamini  | FDR        |
| GOTERM_CC_DIRECT      | GO:0005768~endosome                                                                      | 4     | 1.913875598 | 0.475222159 | CLCN3, VOPP1, ARRDC3, KDR                             | 191        | 250      | 18520     | 1.551413613     | 1          | 0.96199194 | 99.9715546 |
| GOTERM_CC_DIRECT      | GO:0005769~early endosome                                                                | 3     | 1.435406699 | 0.644987557 | CLCN3, ARRDC3, KDR                                    | 191        | 213      | 18520     | 1.365680997     | 1          | 0.98676861 | 99.9997983 |
| UP_KEYWORDS           | Endosome                                                                                 | 3     | 1.435406699 | 0.702480518 | CLCN3, ARRDC3, KDR                                    | 206        | 247      | 20793     | 1.225954168     | 1          | 0.96928972 | 99.999976  |
| Annotation Cluster 30 | Enrichment Score: 0.22170715301208152                                                    |       |             |             |                                                       |            |          |           |                 |            |            |            |
| Category              | Term                                                                                     | Count | %           | PValue      | Genes                                                 | List Total | Pop Hits | Pop Total | Fold Enrichment | Bonferroni | Benjamini  | FDR        |
| GOTERM_CC_DIRECT      | GO:0005913~cell-cell adherens junction                                                   | 4     | 1.913875598 | 0.504432893 | PLIN3, NDRG1, DNAJB1, CD200                           | 191        | 259      | 18520     | 1.497503487     | 1          | 0.96395721 | 99.9862266 |
| GOTERM_BP_DIRECT      | GO:0098609~cell-cell adhesion                                                            | 3     | 1.435406699 | 0.640291525 | PLIN3, NDRG1, DNAJB1                                  | 181        | 211      | 17535     | 1.377418764     | 1          | 0.99997062 | 99.9999947 |
| GOTERM_MF_DIRECT      | GO:0098641~cadherin binding involved in cell-cell adhesion                               | 3     | 1.435406699 | 0.669418005 | PLIN3, NDRG1, DNAJB1                                  | 174        | 220      | 16650     | 1.304858934     | 1          | 0.99948285 | 99.9999773 |
| Annotation Cluster 31 | Enrichment Score: 0.13899474661521488                                                    |       |             |             |                                                       |            |          |           |                 |            |            |            |
| Category              | Term                                                                                     | Count | %           | PValue      | Genes                                                 | List Total | Pop Hits | Pop Total | Fold Enrichment | Bonferroni | Benjamini  | FDR        |
| INTERPRO              | IPR019775:WD40 repeat, conserved site                                                    | 3     | 1.435406699 | 0.507499205 | TBL2, TEP1, DENND3                                    | 199        | 166      | 19384     | 1.760368106     | 1          | 0.99990545 | 99.9959472 |
| INTERPRO              | IPR001680:WD40 repeat                                                                    | 3     | 1.435406699 | 0.746867134 | TBL2, TEP1, DENND3                                    | 199        | 260      | 19384     | 1.123927329     | 1          | 0.99999959 | 99.9999997 |
| SMART                 | SM00320:WD40                                                                             | 3     | 1.435406699 | 0.789541377 | TBL2, TEP1, DENND3                                    | 109        | 259      | 9680      | 1.028656442     | 1          | 0.99994831 | 99.999998  |
| INTERPRO              | IPR017986:WD40-repeat-containing domain                                                  | 3     | 1.435406699 | 0.800493048 | TBL2, TEP1, DENND3                                    | 199        | 291      | 19384     | 1.004196239     | 1          | 0.99999993 | 100        |
| INTERPRO              | IPR015943:WD40/YVTN repeat-like-containing domain                                        | 3     | 1.435406699 | 0.842587657 | TBL2, TEP1, DENND3                                    | 199        | 321      | 19384     | 0.910346123     | 1          | 0.99999999 | 100        |
| Annotation Cluster 32 | Enrichment Score: 0.1179127363824024                                                     |       |             |             |                                                       |            |          |           |                 |            |            |            |
| Category              | Term                                                                                     | Count | %           | PValue      | Genes                                                 | List Total | Pop Hits | Pop Total | Fold Enrichment | Bonferroni | Benjamini  | FDR        |
| UP_KEYWORDS           | GTP-binding                                                                              | 3     | 1.435406699 | 0.716973931 | DNM1L, AK4, RASD1                                     | 206        | 254      | 20793     | 1.19216803      | 1          | 0.9720204  | 99.9999872 |

|                       |                                                               |       |             |             |                                                     |            |          |           |                 |            |            |            |
|-----------------------|---------------------------------------------------------------|-------|-------------|-------------|-----------------------------------------------------|------------|----------|-----------|-----------------|------------|------------|------------|
| GOTERM_MF_DIRECT      | GO:0005525~GTP binding                                        | 4     | 1.913875598 | 0.759125289 | DNM1L, ARL16, AK4, RASD1                            | 174        | 380      | 16650     | 1.007259528     | 1          | 0.99988512 | 99.9999997 |
| INTERPRO              | IPR027417:P-loop containing nucleoside triphosphate hydrolase | 8     | 3.827751196 | 0.813663747 | DNM1L, PFKFB3, DDX50, TEP1, ARL16, AK4, HLTf, RASD1 | 199        | 895      | 19384     | 0.870677409     | 1          | 0.99999995 | 100        |
| Annotation Cluster 33 | Enrichment Score: 0.0949871929647967                          |       |             |             |                                                     |            |          |           |                 |            |            |            |
| Category              | Term                                                          | Count | %           | PValue      | Genes                                               | List Total | Pop Hits | Pop Total | Fold Enrichment | Bonferroni | Benjamini  | FDR        |
| INTERPRO              | IPR001849:Pleckstrin homology domain                          | 3     | 1.435406699 | 0.73714815  | BCR, ACAP1, APPL1                                   | 199        | 255      | 19384     | 1.14596512      | 1          | 0.99999956 | 99.9999995 |
| SMART                 | SM00233:PH                                                    | 3     | 1.435406699 | 0.762997137 | BCR, ACAP1, APPL1                                   | 109        | 245      | 9680      | 1.08743681      | 1          | 0.99993585 | 99.9999923 |
| INTERPRO              | IPR011993:Pleckstrin homology-like domain                     | 3     | 1.435406699 | 0.922488015 | BCR, ACAP1, APPL1                                   | 199        | 407      | 19384     | 0.717987974     | 1          | 1          | 100        |
| Annotation Cluster 34 | Enrichment Score: 0.06285416103948721                         |       |             |             |                                                     |            |          |           |                 |            |            |            |
| Category              | Term                                                          | Count | %           | PValue      | Genes                                               | List Total | Pop Hits | Pop Total | Fold Enrichment | Bonferroni | Benjamini  | FDR        |
| INTERPRO              | IPR013087:Zinc finger C2H2-type/integrase DNA-binding domain  | 5     | 2.392344498 | 0.74927517  | BCL11A, BCL6, ZFP503, FIZ1, GZF1                    | 199        | 496      | 19384     | 0.981925758     | 1          | 0.99999949 | 99.9999997 |
| INTERPRO              | IPR007087:Zinc finger, C2H2                                   | 5     | 2.392344498 | 0.852975947 | BCL11A, BCL6, ZFP503, FIZ1, GZF1                    | 199        | 586      | 19384     | 0.831118048     | 1          | 0.99999999 | 100        |
| INTERPRO              | IPR015880:Zinc finger, C2H2-like                              | 4     | 1.913875598 | 0.923215762 | BCL11A, BCL6, FIZ1, GZF1                            | 199        | 551      | 19384     | 0.707129112     | 1          | 1          | 100        |
| SMART                 | SM00355:ZnF_C2H2                                              | 4     | 1.913875598 | 0.949952784 | BCL11A, BCL6, FIZ1, GZF1                            | 109        | 551      | 9680      | 0.644699379     | 1          | 0.99999998 | 100        |
