# Supplementary material for: OUP accepted manuscript
Source: Oxford University Press journal article supplement (doi:10.1093/database/baaa086), 2020-01-01
Supplement: baaa086_supp.zip [file baaa086_supp.zip]

**Supplementary Table 1. Number of protein interactions and their component proteins collected from three databases.**

| Database | All interactions       |                    | High confidence interactions* |                    | Date           |
|----------|------------------------|--------------------|-------------------------------|--------------------|----------------|
|          | Number of interactions | Number of Proteins | Number of interactions        | Number of Proteins |                |
| BioGrid  | 4058                   | 2276               | 1510                          | 1102               | Dec 25th, 2017 |
| Intact   | 5241                   | 2294               | 1231                          | 986                | Dec 12th, 2017 |
| RGD      | 3871                   | 1887               | 1166                          | 829                | Jun 27th,2017  |
| Total    | 6251                   | 3257               | 2693                          | 2452               |                |

\*High confidence interactions: interactions reported in more than two independent studies, at least one of which is low-throughput experiment.
