# Supplementary material for: OUP accepted manuscript
Source: Oxford University Press journal article supplement (doi:10.1093/database/baaa086), 2020-01-01
Supplement: baaa086_supp.zip [file baaa086_supp.zip]

**Supplementary Table 5. Evaluation of the predicted interactions in different datasets.**

| Network     | Sensitivity   | Reliability   |
|-------------|---------------|---------------|
| MIST        | 0.54%         | 57.03%        |
| <b>PRID</b> | <b>13.02%</b> | <b>52.59%</b> |
| STRING      | 14.83%        | 2.74%         |
