# Supplementary material for: OUP accepted manuscript
Source: Oxford University Press journal article supplement (doi:10.1093/database/baaa086), 2020-01-01
Supplement: baaa086_supp.zip [file baaa086_supp.zip]

**Supplementary Table 4: The top 250 up-regulated genes used in microarray data analysis.**

| Gene symbol             | Gene title                                                                                                                                                                             | adj.P.Val | P.Value  | logFC |
|-------------------------|----------------------------------------------------------------------------------------------------------------------------------------------------------------------------------------|-----------|----------|-------|
| Mmp12                   | matrix metalloproteinase 12                                                                                                                                                            | 3.56E-07  | 1.14E-11 | 3.69  |
| Ak4                     | adenylate kinase 4                                                                                                                                                                     | 9.10E-07  | 1.65E-10 | 2.74  |
| Ankrd37                 | ankyrin repeat domain 37                                                                                                                                                               | 9.10E-07  | 1.59E-10 | 4.63  |
| Fam65b                  | family with sequence similarity 65, member B                                                                                                                                           | 9.10E-07  | 6.50E-11 | 3.16  |
| Kdm3a                   | lysine demethylase 3A                                                                                                                                                                  | 9.10E-07  | 1.83E-10 | 2.76  |
| Pygl                    | phosphorylase, glycogen, liver                                                                                                                                                         | 9.10E-07  | 1.12E-10 | 2.73  |
| Zfp185                  | zinc finger protein 185                                                                                                                                                                | 9.10E-07  | 2.05E-10 | 4.07  |
| Aldoc                   | aldolase, fructose-bisphosphate C                                                                                                                                                      | 1.33E-06  | 5.54E-10 | 2.51  |
| Ccl27                   | C-C motif chemokine ligand 27                                                                                                                                                          | 1.33E-06  | 4.21E-10 | 2.53  |
| Gbe1                    | glucan (1,4-alpha-), branching enzyme 1                                                                                                                                                | 1.33E-06  | 5.00E-10 | 2.61  |
| Gpt                     | glutamic--pyruvic transaminase                                                                                                                                                         | 1.33E-06  | 3.46E-10 | 2.64  |
| LOC100911625///Eno2     | gamma-enolase-like//enolase 2, gamma, neuronal                                                                                                                                         | 1.33E-06  | 5.63E-10 | 2.56  |
| Ncl4                    | nucleolar protein 4                                                                                                                                                                    | 1.33E-06  | 4.37E-10 | 2.6   |
| P4ha1                   | prolyl 4-hydroxylase subunit alpha 1                                                                                                                                                   | 1.37E-06  | 7.04E-10 | 2.32  |
| Basp1                   | brain abundant, membrane attached signal protein 1                                                                                                                                     | 1.39E-06  | 9.54E-10 | 2.73  |
| Ctla2a                  | cytotoxic T lymphocyte-associated protein 2 alpha                                                                                                                                      | 1.39E-06  | 9.24E-10 | 2.6   |
| Ifi272b                 | interferon, alpha-inducible protein 27 like 2B                                                                                                                                         | 1.39E-06  | 9.01E-10 | 2.28  |
| Nudt22                  | nudix hydrolase 22                                                                                                                                                                     | 1.39E-06  | 9.84E-10 | 2.37  |
| Spsb1                   | splA/ryanodine receptor domain and SOCS box containing 1                                                                                                                               | 1.39E-06  | 9.25E-10 | 2.33  |
| Ardc3                   | arrestin domain containing 3                                                                                                                                                           | 1.47E-06  | 1.13E-09 | 2.43  |
| LOC691807               | hypothetical protein LOC691807                                                                                                                                                         | 1.47E-06  | 1.10E-09 | 2.1   |
| Efemp2                  | EGF-containing fibulin-like extracellular matrix protein 2                                                                                                                             | 1.75E-06  | 1.63E-09 | 2.02  |
| Pdk1                    | pyruvate dehydrogenase kinase 1                                                                                                                                                        | 1.75E-06  | 1.48E-09 | 2.3   |
| Plod2                   | procollagen lysine, 2-oxoglutarate 5-dioxygenase 2                                                                                                                                     | 1.75E-06  | 1.52E-09 | 3.58  |
| Rasd1                   | ras related dexamethasone induced 1                                                                                                                                                    | 1.75E-06  | 1.62E-09 | 2.26  |
| Tbl2                    | transducin (beta)-like 2                                                                                                                                                               | 1.82E-06  | 1.81E-09 | 2.19  |
| Ceacam15                | carcinoembryonic antigen-related cell adhesion molecule 15                                                                                                                             | 1.90E-06  | 1.96E-09 | 2.08  |
| Plpp1                   | phospholipid phosphatase 1                                                                                                                                                             | 2.01E-06  | 2.20E-09 | 2.29  |
| Vegfa                   | vascular endothelial growth factor A                                                                                                                                                   | 2.01E-06  | 2.16E-09 | 1.83  |
| Dlc1                    | DLC1 Rho GTPase activating protein                                                                                                                                                     | 2.06E-06  | 2.32E-09 | 1.96  |
| Il1r2                   | interleukin 1 receptor type 2                                                                                                                                                          | 2.27E-06  | 2.63E-09 | 1.79  |
| Il33                    | interleukin 33                                                                                                                                                                         | 2.65E-06  | 3.15E-09 | 1.94  |
| Ddit4                   | DNA-damage-inducible transcript 4                                                                                                                                                      | 3.02E-06  | 3.69E-09 | 2.61  |
| Asic1                   | acid sensing ion channel subunit 1                                                                                                                                                     | 3.03E-06  | 3.89E-09 | 2.14  |
| Dpp3l//LOC678760///Dpp3 | dipeptidylpeptidase 3-like//similar to Dipeptidyl-peptidase 3 (Dipeptidyl-peptidase III) (DPP III) (Dipeptidyl aminopeptidase III) (Dipeptidyl arylamidase III)//dipeptidylpeptidase 3 | 3.03E-06  | 3.97E-09 | 1.81  |
| Stbd1                   | starch binding domain 1                                                                                                                                                                | 3.03E-06  | 4.10E-09 | 2.52  |
| RGD1309104              | similar to RIKEN cDNA 1700025G04 gene                                                                                                                                                  | 3.23E-06  | 4.47E-09 | 2.12  |
| Slc25a36                | solute carrier family 25 member 36                                                                                                                                                     | 3.26E-06  | 4.61E-09 | 1.97  |
| Acp5                    | acid phosphatase 5, tartrate resistant                                                                                                                                                 | 4.10E-06  | 5.93E-09 | 1.87  |
| Cd200                   | Cd200 molecule                                                                                                                                                                         | 4.39E-06  | 6.64E-09 | 1.94  |
| Slc35e1                 | solute carrier family 35, member E1                                                                                                                                                    | 4.39E-06  | 6.61E-09 | 1.56  |
| Ppp1r3c                 | protein phosphatase 1, regulatory subunit 3C                                                                                                                                           | 4.86E-06  | 7.50E-09 | 4.71  |
| Bnip3                   | BCL2/adenovirus E1B interacting protein 3                                                                                                                                              | 5.07E-06  | 7.99E-09 | 1.75  |
| Nr4a3                   | nuclear receptor subfamily 4, group A, member 3                                                                                                                                        | 5.34E-06  | 8.59E-09 | 2.09  |
| Bhlhe40                 | basic helix-loop-helix family, member e40                                                                                                                                              | 5.37E-06  | 1.05E-08 | 3.16  |
| Egln1                   | egl-9 family hypoxia-inducible factor 1                                                                                                                                                | 5.37E-06  | 1.04E-08 | 1.74  |
| Il33                    | interleukin 33                                                                                                                                                                         | 5.37E-06  | 8.84E-09 | 2.25  |
| Mllt11                  | myeloid/lymphoid or mixed-lineage leukemia; translocated to, 11                                                                                                                        | 5.37E-06  | 9.09E-09 | 1.56  |
| Narf                    | nuclear prelamin A recognition factor                                                                                                                                                  | 5.37E-06  | 1.03E-08 | 1.51  |
| Pfkfb3                  | 6-phosphofructo-2-kinase/fructose-2,6-bisphosphatase 3                                                                                                                                 | 5.37E-06  | 1.02E-08 | 1.61  |
| Rimkb                   | ribosomal modification protein rimK-like family member B                                                                                                                               | 5.37E-06  | 1.02E-08 | 2.43  |
| Tep1                    | telomerase associated protein 1                                                                                                                                                        | 5.37E-06  | 9.40E-09 | 1.57  |
| Wwp1                    | WW domain containing E3 ubiquitin protein ligase 1                                                                                                                                     | 5.37E-06  | 1.05E-08 | 1.45  |
| Rcctb1                  | RCC1 and BTB domain containing protein 1                                                                                                                                               | 5.46E-06  | 1.11E-08 | 1.62  |
| Rcc1l                   | RCC1 like                                                                                                                                                                              | 5.98E-06  | 1.25E-08 | 1.76  |
| Greb1l                  | growth regulation by estrogen in breast cancer 1 like                                                                                                                                  | 6.02E-06  | 1.30E-08 | 1.77  |
| Pgm1                    | phosphoglucomutase 1                                                                                                                                                                   | 6.02E-06  | 1.30E-08 | 1.66  |
| Guca1a                  | guanylate cyclase activator 1A                                                                                                                                                         | 6.22E-06  | 1.40E-08 | 2.85  |
| Phtf1                   | putative homeodomain transcription factor 1                                                                                                                                            | 6.22E-06  | 1.38E-08 | 2.05  |
| Vsir                    | V-set immunoregulatory receptor                                                                                                                                                        | 6.62E-06  | 1.51E-08 | 1.64  |
| Bcl11a                  | B-cell CLL/lymphoma 11A                                                                                                                                                                | 6.74E-06  | 1.58E-08 | 1.58  |
| Casp6                   | caspase 6                                                                                                                                                                              | 6.74E-06  | 1.61E-08 | 1.44  |
| Cdcp1                   | CUB domain containing protein 1                                                                                                                                                        | 6.74E-06  | 1.80E-08 | 1.7   |
| Fam46a                  | family with sequence similarity 46, member A                                                                                                                                           | 6.74E-06  | 1.84E-08 | 2.12  |
| Foxo3                   | forkhead box O3                                                                                                                                                                        | 6.74E-06  | 1.73E-08 | 2.16  |

|                           |                                                                                                           |          |          |      |
|---------------------------|-----------------------------------------------------------------------------------------------------------|----------|----------|------|
| Hk2                       | hexokinase 2                                                                                              | 6.74E-06 | 1.67E-08 | 1.95 |
| Kdr                       | kinase insert domain receptor                                                                             | 6.74E-06 | 1.74E-08 | 1.73 |
| Ndrgl                     | N-myc downstream regulated 1                                                                              | 6.74E-06 | 1.78E-08 | 1.37 |
| Pgm1                      | phosphoglucomutase 1                                                                                      | 6.74E-06 | 1.84E-08 | 1.65 |
| Ppmlj                     | protein phosphatase, Mg2+/Mn2+ dependent, 1J                                                              | 6.74E-06 | 1.76E-08 | 1.59 |
| Prepl                     | prolyl endopeptidase-like                                                                                 | 6.74E-06 | 1.72E-08 | 1.7  |
| Spidr                     | scaffolding protein involved in DNA repair                                                                | 6.74E-06 | 1.61E-08 | 2.09 |
| Cdcp1                     | CUB domain containing protein 1                                                                           | 7.18E-06 | 2.13E-08 | 1.54 |
| Efemp2                    | EGF-containing fibulin-like extracellular matrix protein 2                                                | 7.18E-06 | 2.04E-08 | 1.81 |
| Mmp9                      | matrix metalloproteinase 9                                                                                | 7.18E-06 | 2.07E-08 | 1.4  |
| Proser2                   | proline and serine rich 2                                                                                 | 7.18E-06 | 2.08E-08 | 1.88 |
| Vldlr                     | very low density lipoprotein receptor                                                                     | 7.51E-06 | 2.27E-08 | 2.83 |
| Gng2                      | G protein subunit gamma 2                                                                                 | 7.57E-06 | 2.36E-08 | 1.5  |
| Hspa1b//Hspa1a            | heat shock 70kD protein 1B (mapped)//heat shock 70kD protein 1A                                           | 7.75E-06 | 2.49E-08 | 1.37 |
| Mysml                     | myb-like, SWIRM and MPN domains 1                                                                         | 7.75E-06 | 2.49E-08 | 1.46 |
| Slc22a5                   | solute carrier family 22 member 5                                                                         | 7.75E-06 | 2.44E-08 | 2.02 |
| Ell                       | elongation factor for RNA polymerase II                                                                   | 8.92E-06 | 3.01E-08 | 1.33 |
| Greb1l                    | growth regulation by estrogen in breast cancer 1 like                                                     | 8.92E-06 | 3.00E-08 | 1.41 |
| Noct                      | nocturnin                                                                                                 | 9.29E-06 | 3.22E-08 | 1.43 |
| Vwal                      | von Willebrand factor A domain containing 1                                                               | 9.34E-06 | 3.27E-08 | 2.61 |
| Ero1a                     | endoplasmic reticulum oxidoreductase 1 alpha                                                              | 9.61E-06 | 3.57E-08 | 1.28 |
| Hilpda                    | hypoxia inducible lipid droplet-associated                                                                | 9.61E-06 | 3.52E-08 | 1.37 |
| Il1rap                    | interleukin 1 receptor accessory protein                                                                  | 9.61E-06 | 3.74E-08 | 1.66 |
| Klc4                      | kinesin light chain 4                                                                                     | 9.61E-06 | 3.72E-08 | 1.7  |
| Parp16                    | poly (ADP-ribose) polymerase family, member 16                                                            | 9.61E-06 | 3.53E-08 | 1.37 |
| Scrn1                     | secernin 1                                                                                                | 9.85E-06 | 3.89E-08 | 2.3  |
| Mab21l3                   | mab-21 like 3                                                                                             | 9.86E-06 | 3.95E-08 | 2.46 |
| Vldlr                     | very low density lipoprotein receptor                                                                     | 9.86E-06 | 3.96E-08 | 2.69 |
| P4ha2                     | prolyl 4-hydroxylase subunit alpha 2                                                                      | 1.03E-05 | 4.16E-08 | 1.5  |
| Ddx50                     | DEAD-box helicase 50                                                                                      | 1.09E-05 | 4.55E-08 | 1.29 |
| LOC100911293//LOC691658// | gamma-secretase subunit APH-1B-like//similar to anterior pharynx defective 1b                             | 1.09E-05 | 4.47E-08 | 1.36 |
| Aph1b                     | homolog//aph-1 homolog B, gamma secretase subunit                                                         |          |          |      |
| Rnfl38                    | ring finger protein 138                                                                                   | 1.09E-05 | 4.58E-08 | 1.37 |
| Vegfa                     | vascular endothelial growth factor A                                                                      | 1.11E-05 | 4.75E-08 | 1.93 |
| Abhd18                    | abhydrolase domain containing 18                                                                          | 1.16E-05 | 5.07E-08 | 1.22 |
| Efnal                     | ephrin A1                                                                                                 | 1.22E-05 | 5.51E-08 | 1.39 |
| Higd1a                    | HIG1 hypoxia inducible domain family, member 1A                                                           | 1.22E-05 | 5.58E-08 | 1.23 |
| LOC102550354              | uncharacterized LOC102550354                                                                              | 1.22E-05 | 5.69E-08 | 2.57 |
| Smtnl2                    | smoothelin-like 2                                                                                         | 1.22E-05 | 5.72E-08 | 1.72 |
| Zc3h7b                    | zinc finger CCCH-type containing 7B                                                                       | 1.22E-05 | 5.68E-08 | 1.23 |
| Cpm                       | carboxypeptidase M                                                                                        | 1.25E-05 | 5.93E-08 | 2.22 |
| Sec22b                    | SEC22 homolog B, vesicle trafficking protein                                                              | 1.25E-05 | 6.02E-08 | 1.24 |
| Tiparp                    | TCDD-inducible poly(ADP-ribose) polymerase                                                                | 1.25E-05 | 6.00E-08 | 1.37 |
| LOC501445//Derl1          | derlin-1 pseudogene//derlin 1                                                                             | 1.27E-05 | 6.16E-08 | 1.3  |
| Dusp1                     | dual specificity phosphatase 1                                                                            | 1.28E-05 | 6.29E-08 | 1.19 |
| Adams9                    | ADAM metalloproteinase with thrombospondin type 1 motif, 9                                                | 1.30E-05 | 6.59E-08 | 1.31 |
| Eif2ak4                   | eukaryotic translation initiation factor 2 alpha kinase 4                                                 | 1.30E-05 | 6.83E-08 | 1.14 |
| Higd1a                    | HIG1 hypoxia inducible domain family, member 1A                                                           | 1.30E-05 | 6.82E-08 | 1.56 |
| Id3                       | inhibitor of DNA binding 3, HLH protein                                                                   | 1.30E-05 | 6.82E-08 | 1.75 |
| Map3k8                    | mitogen-activated protein kinase kinase kinase 8                                                          | 1.30E-05 | 6.61E-08 | 1.82 |
| Slc27a1                   | solute carrier family 27 member 1                                                                         | 1.30E-05 | 6.70E-08 | 1.48 |
| Bnip3l                    | BCL2/adenovirus E1B interacting protein 3-like                                                            | 1.32E-05 | 7.19E-08 | 1.21 |
| Fbln1                     | fibulin 1                                                                                                 | 1.32E-05 | 7.13E-08 | 1.51 |
| Insig2                    | insulin induced gene 2                                                                                    | 1.32E-05 | 6.94E-08 | 1.45 |
| Mex3b                     | mex-3 RNA binding family member B                                                                         | 1.32E-05 | 7.06E-08 | 1.64 |
| Nptx1                     | neuronal pentraxin 1                                                                                      | 1.32E-05 | 7.40E-08 | 1.57 |
| Ramp3                     | receptor (G protein-coupled) activity modifying protein 3                                                 | 1.32E-05 | 7.34E-08 | 1.55 |
| RGD1560795//Spr           | similar to Sepiapterin reductase (SPR)//sepiapterin reductase (7,8-dihydrobiopterin:NADP+ oxidoreductase) | 1.32E-05 | 7.41E-08 | 1.48 |
| RGD1562037                | similar to OTTHUMP00000046255                                                                             | 1.32E-05 | 7.18E-08 | 1.14 |
| Spsb1                     | splA/ryanodine receptor domain and SOCS box containing 1                                                  | 1.32E-05 | 7.48E-08 | 2.2  |
| Insig1                    | insulin induced gene 1                                                                                    | 1.34E-05 | 7.69E-08 | 1.74 |
| Insig2                    | insulin induced gene 2                                                                                    | 1.34E-05 | 7.82E-08 | 1.85 |
| Sphk1                     | sphingosine kinase 1                                                                                      | 1.44E-05 | 8.68E-08 | 1.57 |
| Zfp503                    | zinc finger protein 503                                                                                   | 1.45E-05 | 8.89E-08 | 1.59 |
| Dnajb1                    | DnaJ heat shock protein family (Hsp40) member B1                                                          | 1.46E-05 | 9.04E-08 | 1.1  |
| Tspo                      | translocator protein                                                                                      | 1.46E-05 | 8.96E-08 | 1.13 |
| Plau                      | plasminogen activator, urokinase                                                                          | 1.50E-05 | 9.30E-08 | 1.09 |
| Hp                        | haptoglobin                                                                                               | 1.53E-05 | 9.53E-08 | 1.04 |
| Rnfl125                   | ring finger protein 125                                                                                   | 1.53E-05 | 9.57E-08 | 2.04 |

|                        |                                                                                     |          |          |          |
|------------------------|-------------------------------------------------------------------------------------|----------|----------|----------|
| Chpt1                  | choline phosphotransferase 1                                                        | 1.57E-05 | 1.00E-07 | 1.32     |
| Clen3                  | chloride voltage-gated channel 3                                                    | 1.66E-05 | 1.08E-07 | 1.47     |
| Hmx1                   | H6 family homeobox 1                                                                | 1.66E-05 | 1.08E-07 | 1.59     |
| Clen3                  | chloride voltage-gated channel 3                                                    | 1.69E-05 | 1.10E-07 | 1.34     |
| Eif4e3                 | eukaryotic translation initiation factor 4E family member 3                         | 1.69E-05 | 1.11E-07 | 1.05     |
| Nfil3                  | nuclear factor, interleukin 3 regulated                                             | 1.70E-05 | 1.12E-07 | 1.13     |
| Bnip3l                 | BCL2/adenovirus E1B interacting protein 3-like                                      | 1.74E-05 | 1.15E-07 | 1.15     |
| Acvr1l                 | activin A receptor like type 1                                                      | 1.75E-05 | 1.18E-07 | 2.02     |
| Gpr1                   | G protein-coupled receptor 1                                                        | 1.75E-05 | 1.18E-07 | 1.2      |
| Syne1                  | spectrin repeat containing nuclear envelope protein 1                               | 1.75E-05 | 1.19E-07 | 1.47     |
| Prkcq                  | protein kinase C, theta                                                             | 1.76E-05 | 1.21E-07 | 1.32     |
| Acap1                  | ArfGAP with coiled-coil, ankyrin repeat and PH domains 1                            | 1.80E-05 | 1.26E-07 | 1.39     |
| Eif4ebp1               | eukaryotic translation initiation factor 4E binding protein 1                       | 1.88E-05 | 1.33E-07 | 1.07     |
| Hltf                   | helicase-like transcription factor                                                  | 1.96E-05 | 1.39E-07 | 1.02     |
| LOC100910685///Gcat    | 2-amino-3-ketobutyrate coenzyme A ligase, mitochondrial-like///glycine C-acetyltr   | 1.96E-05 | 1.40E-07 | 1.34     |
| Pard6b                 | par-6 family cell polarity regulator beta                                           | 1.96E-05 | 1.41E-07 | 1.02     |
| Wnt4                   | wingless-type MMTV integration site family, member 4                                | 1.96E-05 | 1.41E-07 | 1.28     |
| Cpm                    | carboxypeptidase M                                                                  | 1.99E-05 | 1.48E-07 | 1.87     |
| LOC100909732///Fam122b | protein FAM122B-like///family with sequence similarity 122B                         | 1.99E-05 | 1.49E-07 | 1.06     |
| Maff                   | MAF bZIP transcription factor F                                                     | 1.99E-05 | 1.48E-07 | 1.15     |
| Mat2b                  | methionine adenosyltransferase 2B                                                   | 2.01E-05 | 1.53E-07 | 1.07     |
| Foxo4                  | forkhead box O4                                                                     | 2.03E-05 | 1.56E-07 | 1.66     |
| Gpi                    | glucose-6-phosphate isomerase                                                       | 2.05E-05 | 1.59E-07 | 1.22     |
| LOC100912399///Map3k1  | mitogen-activated protein kinase kinase 1-like///mitogen-activated protein ki       | 2.06E-05 | 1.60E-07 | 9.98E-01 |
| App1l                  | adaptor protein, phosphotyrosine interacting with PH domain and leucine zipper 1    | 2.09E-05 | 1.64E-07 | 1.12     |
| Atp11b                 | ATPase phospholipid transporting 11B (putative)                                     | 2.09E-05 | 1.64E-07 | 1.73     |
| Slc2a1                 | solute carrier family 2 member 1                                                    | 2.10E-05 | 1.69E-07 | 1.05     |
| Tceal9                 | transcription elongation factor A like 9                                            | 2.15E-05 | 1.75E-07 | 1.02     |
| Bcr                    | BCR, RhoGEF and GTPase activating protein                                           | 2.19E-05 | 1.80E-07 | 1.17     |
| Arl16                  | ADP-ribosylation factor like GTPase 16                                              | 2.21E-05 | 1.83E-07 | 1.09     |
| Gzfl                   | GDNF-inducible zinc finger protein 1                                                | 2.21E-05 | 1.84E-07 | 1.02     |
| Cdkn1b                 | cyclin-dependent kinase inhibitor 1B                                                | 2.22E-05 | 1.87E-07 | 1.22     |
| Hagh                   | hydroxyacyl glutathione hydrolase                                                   | 2.22E-05 | 1.86E-07 | 9.83E-01 |
| Hbp1                   | HMG-box transcription factor 1                                                      | 2.23E-05 | 1.92E-07 | 1.09     |
| Rsrp1                  | arginine and serine rich protein 1                                                  | 2.23E-05 | 1.93E-07 | 1.34     |
| Vldlr                  | very low density lipoprotein receptor                                               | 2.23E-05 | 1.90E-07 | 2.22     |
| Zap70                  | zeta-chain (TCR) associated protein kinase 70                                       | 2.23E-05 | 1.93E-07 | 1.86     |
| Arl16                  | ADP-ribosylation factor like GTPase 16                                              | 2.24E-05 | 1.94E-07 | 1.12     |
| LOC100910137///Triap1  | TP53-regulated inhibitor of apoptosis 1-like///TP53 regulated inhibitor of apoptosi | 2.25E-05 | 1.97E-07 | 1.09     |
| Hspa1a                 | heat shock 70kD protein 1A                                                          | 2.28E-05 | 2.01E-07 | 1.44     |
| Il2rb                  | interleukin 2 receptor subunit beta                                                 | 2.28E-05 | 2.01E-07 | 1.17     |
| Alkbh5                 | alkB homolog 5, RNA demethylase                                                     | 2.31E-05 | 2.06E-07 | 9.84E-01 |
| Comt                   | catechol-O-methyltransferase                                                        | 2.41E-05 | 2.21E-07 | 1.23     |
| Lrif1                  | ligand dependent nuclear receptor interacting factor 1                              | 2.41E-05 | 2.22E-07 | 1.37     |
| Mmp9                   | matrix metalloproteinase 9                                                          | 2.41E-05 | 2.22E-07 | 1.02     |
| Zmynd10                | zinc finger, MYND-type containing 10                                                | 2.41E-05 | 2.22E-07 | 1.3      |
| Rsrp1                  | arginine and serine rich protein 1                                                  | 2.56E-05 | 2.38E-07 | 1.92     |
| Tspan33                | tetraspanin 33                                                                      | 2.56E-05 | 2.38E-07 | 9.77E-01 |
| LOC683062///Vdac1      | similar to voltage-dependent anion channel 1///voltage-dependent anion channel 1    | 2.71E-05 | 2.56E-07 | 1.05     |
| Faslg                  | Fas ligand                                                                          | 2.78E-05 | 2.73E-07 | 1.52     |
| Ero1a                  | endoplasmic reticulum oxidoreductase 1 alpha                                        | 2.82E-05 | 2.81E-07 | 1.89     |
| Prkag2                 | protein kinase AMP-activated non-catalytic subunit gamma 2                          | 2.82E-05 | 2.82E-07 | 1.18     |
| Vopp1                  | vesicular, overexpressed in cancer, prosurvival protein 1                           | 2.82E-05 | 2.79E-07 | 2.26     |
| Ndrp1                  | N-myc downstream regulated 1                                                        | 2.84E-05 | 2.85E-07 | 1.89     |
| Prrc1                  | proline-rich coiled-coil 1                                                          | 2.88E-05 | 2.89E-07 | 1.29     |
| Zc3h7b                 | zinc finger CCCH-type containing 7B                                                 | 2.88E-05 | 2.91E-07 | 1.07     |
| Scpep1                 | serine carboxypeptidase 1                                                           | 2.89E-05 | 2.93E-07 | 9.61E-01 |
| Entpd2                 | ectonucleoside triphosphate diphosphohydrolase 2                                    | 2.93E-05 | 3.00E-07 | 1.15     |
| Lrrc8a                 | leucine rich repeat containing 8 family, member A                                   | 2.93E-05 | 2.99E-07 | 1.14     |
| Cr1l                   | complement component (3b/4b) receptor 1-like                                        | 2.94E-05 | 3.03E-07 | 9.25E-01 |
| Hexb                   | hexosaminidase subunit beta                                                         | 2.94E-05 | 3.04E-07 | 9.30E-01 |
| Slc27a3                | solute carrier family 27 member 3                                                   | 2.95E-05 | 3.07E-07 | 9.24E-01 |
| Arrdc3                 | arrestin domain containing 3                                                        | 2.97E-05 | 3.14E-07 | 2.46     |
| Kdm4b                  | lysine demethylase 4B                                                               | 2.97E-05 | 3.10E-07 | 1.17     |
| LOC102553917           | putative zinc finger protein 724-like                                               | 2.97E-05 | 3.13E-07 | 1.09     |
| Entpd4                 | ectonucleoside triphosphate diphosphohydrolase 4                                    | 2.99E-05 | 3.19E-07 | 9.61E-01 |
| Prkag2                 | protein kinase AMP-activated non-catalytic subunit gamma 2                          | 3.00E-05 | 3.25E-07 | 1.31     |
| Ceng2                  | cyclin G2                                                                           | 3.01E-05 | 3.29E-07 | 1.98     |
| Dst                    | dystonin                                                                            | 3.01E-05 | 3.29E-07 | 1.29     |
| Ksr1                   | kinase suppressor of ras 1                                                          | 3.01E-05 | 3.30E-07 | 9.32E-01 |

|                          |                                                                                   |          |          |          |
|--------------------------|-----------------------------------------------------------------------------------|----------|----------|----------|
| Pdk1                     | pyruvate dehydrogenase kinase 1                                                   | 3.10E-05 | 3.44E-07 | 1.56     |
| LOC100911874///Slc40a1   | solute carrier family 40 member 1-like///solute carrier family 40 member 1        | 3.22E-05 | 3.65E-07 | 9.02E-01 |
| Bcl6                     | B-cell CLL/lymphoma 6                                                             | 3.32E-05 | 3.79E-07 | 1.59     |
| Dnm1l                    | dynamin 1-like                                                                    | 3.35E-05 | 3.88E-07 | 1.03     |
| Rybp                     | RING1 and YY1 binding protein                                                     | 3.35E-05 | 3.88E-07 | 1.01     |
| Jmjd6                    | jumonji domain containing 6                                                       | 3.36E-05 | 3.91E-07 | 1        |
| Bmt2                     | base methyltransferase of 25S rRNA 2 homolog                                      | 3.39E-05 | 4.00E-07 | 9.21E-01 |
| Hikeshi                  | Hikeshi, heat shock protein nuclear import factor                                 | 3.45E-05 | 4.16E-07 | 8.73E-01 |
| Mnt                      | MAX network transcriptional repressor                                             | 3.46E-05 | 4.21E-07 | 9.06E-01 |
| Slc6a8                   | solute carrier family 6 member 8                                                  | 3.46E-05 | 4.26E-07 | 9.34E-01 |
| Tomm7                    | translocase of outer mitochondrial membrane 7                                     | 3.46E-05 | 4.22E-07 | 8.75E-01 |
| Pfk1                     | phosphofructokinase, liver type                                                   | 3.51E-05 | 4.40E-07 | 1.31     |
| Asic1                    | acid sensing ion channel subunit 1                                                | 3.58E-05 | 4.54E-07 | 1.46     |
| Dnajc3                   | DnaJ heat shock protein family (Hsp40) member C3                                  | 3.58E-05 | 4.53E-07 | 9.94E-01 |
| Tpgs2                    | tubulin polyglutamylase complex subunit 2                                         | 3.58E-05 | 4.54E-07 | 9.90E-01 |
| Dtna                     | dystrobrevin, alpha                                                               | 3.60E-05 | 4.59E-07 | 1.66     |
| Fcna                     | ficolin A                                                                         | 3.60E-05 | 4.59E-07 | 1.46     |
| Cited2                   | Cbp/p300-interacting transactivator, with Glu/Asp-rich carboxy-terminal domain, 1 | 3.62E-05 | 4.72E-07 | 8.43E-01 |
| Dennd3                   | DENN domain containing 3                                                          | 3.62E-05 | 4.72E-07 | 1.06     |
| MLL3                     | MLLT3, super elongation complex subunit                                           | 3.62E-05 | 4.74E-07 | 9.92E-01 |
| Khnyln                   | KH and NYN domain containing                                                      | 3.64E-05 | 4.85E-07 | 1.29     |
| Dnajb9                   | DnaJ heat shock protein family (Hsp40) member B9                                  | 3.68E-05 | 4.93E-07 | 1.15     |
| Tspan31                  | tetraspanin 31                                                                    | 3.71E-05 | 5.04E-07 | 8.66E-01 |
| Actn1                    | actinin, alpha 1                                                                  | 3.77E-05 | 5.16E-07 | 1.09     |
| Cblb                     | Cbl proto-oncogene B                                                              | 3.78E-05 | 5.22E-07 | 1.12     |
| Upp1                     | uridine phosphorylase 1                                                           | 3.78E-05 | 5.22E-07 | 1.31     |
| Ifi27                    | interferon, alpha-inducible protein 27                                            | 3.81E-05 | 5.27E-07 | 9.51E-01 |
| Slc16a3                  | solute carrier family 16 member 3                                                 | 3.81E-05 | 5.28E-07 | 1.08     |
| Kctd11                   | potassium channel tetramerization domain containing 11                            | 3.86E-05 | 5.38E-07 | 1.18     |
| LOC100911642///LOC680835 | cullin-7-like///similar to cullin 7                                               | 3.93E-05 | 5.49E-07 | 9.65E-01 |
| Plin3                    | perilipin 3                                                                       | 4.03E-05 | 5.74E-07 | 8.96E-01 |
| Kazald1                  | Kazal-type serine peptidase inhibitor domain 1                                    | 4.07E-05 | 5.85E-07 | 1.3      |
| Asic1                    | acid sensing ion channel subunit 1                                                | 4.09E-05 | 5.93E-07 | 1.62     |
| Lrg1                     | leucine-rich alpha-2-glycoprotein 1                                               | 4.09E-05 | 5.93E-07 | 1.56     |
| Pgk1                     | phosphoglycerate kinase 1                                                         | 4.09E-05 | 5.94E-07 | 9.05E-01 |
| Surf4                    | surfeit 4                                                                         | 4.15E-05 | 6.04E-07 | 9.17E-01 |
| Arhgap8                  | Rho GTPase activating protein 8                                                   | 4.17E-05 | 6.08E-07 | 9.94E-01 |
| Ctsm                     | cathepsin M                                                                       | 4.20E-05 | 6.17E-07 | 1.25     |
| Egln3                    | egl-9 family hypoxia-inducible factor 3                                           | 4.20E-05 | 6.17E-07 | 1.14     |
| Xkr8                     | XK related 8                                                                      | 4.25E-05 | 6.29E-07 | 1.21     |
| Mturn                    | maturin, neural progenitor differentiation regulator homolog (Xenopus)            | 4.28E-05 | 6.36E-07 | 1.61     |
| Prrc1                    | proline-rich coiled-coil 1                                                        | 4.34E-05 | 6.50E-07 | 8.27E-01 |
| Sqle                     | squalene epoxidase                                                                | 4.38E-05 | 6.61E-07 | 1.35     |
| Clcn3                    | chloride voltage-gated channel 3                                                  | 4.39E-05 | 6.67E-07 | 1.38     |
| Tmem59                   | transmembrane protein 59                                                          | 4.39E-05 | 6.67E-07 | 8.27E-01 |
| Fiz1                     | FLT3-interacting zinc finger 1                                                    | 4.41E-05 | 6.70E-07 | 1.14     |
| Clcn3                    | chloride voltage-gated channel 3                                                  | 4.45E-05 | 6.99E-07 | 1.47     |
