# Supplementary material for: OUP accepted manuscript
Source: Oxford University Press journal article supplement (doi:10.1093/database/baaa086), 2020-01-01
Supplement: baaa086_supp.zip [file baaa086_supp.zip]

**Supplementary Table 8. Annotations reported by gene ontology analysis for the top 250 transcriptionally changed genes.**

|                                                                                                         |                                                     |                |                     |                       |                            |                        |                |
|---------------------------------------------------------------------------------------------------------|-----------------------------------------------------|----------------|---------------------|-----------------------|----------------------------|------------------------|----------------|
| Analysis Type:                                                                                          | PANTHER Overrepresentation Test (Released 20190711) |                |                     |                       |                            |                        |                |
| Annotation Version and Release Date:                                                                    | GO Ontology database Released 2019-07-03            |                |                     |                       |                            |                        |                |
| Analyzed List:                                                                                          | upload_1 (Rattus norvegicus)                        |                |                     |                       |                            |                        |                |
| Reference List:                                                                                         | Rattus norvegicus (all genes in database)           |                |                     |                       |                            |                        |                |
| Test Type:                                                                                              | FISHER                                              |                |                     |                       |                            |                        |                |
| Correction:                                                                                             | FDR                                                 |                |                     |                       |                            |                        |                |
| GO biological process complete                                                                          | Rattus norvegicus - REFLIST (21465)                 | upload_1 (204) | upload_1 (expected) | upload_1 (over/under) | upload_1 (fold Enrichment) | upload_1 (raw P-value) | upload_1 (FDR) |
| peptidyl-proline hydroxylation to 4-hydroxy-L-proline (GO:0018401)                                      | 8                                                   | 4              | 0.08                | +                     | 52.61                      | 3.56E-06               | 8.27E-04       |
| 4-hydroxyproline metabolic process (GO:0019471)                                                         | 12                                                  | 5              | 0.11                | +                     | 43.84                      | 3.97E-07               | 1.48E-04       |
| peptidyl-proline hydroxylation (GO:0019511)                                                             | 13                                                  | 4              | 0.12                | +                     | 32.38                      | 1.65E-05               | 2.34E-03       |
| positive regulation of mitochondrial depolarization (GO:0051901)                                        | 11                                                  | 3              | 0.1                 | +                     | 28.7                       | 2.77E-04               | 2.07E-02       |
| mitochondrial fragmentation involved in apoptotic process (GO:0043653)                                  | 12                                                  | 3              | 0.11                | +                     | 26.31                      | 3.44E-04               | 2.44E-02       |
| positive regulation of membrane depolarization (GO:1904181)                                             | 13                                                  | 3              | 0.12                | +                     | 24.28                      | 4.21E-04               | 2.88E-02       |
| protein hydroxylation (GO:0018126)                                                                      | 27                                                  | 6              | 0.26                | +                     | 23.38                      | 5.80E-07               | 1.94E-04       |
| negative regulation of transcription from RNA polymerase II promoter in response to stress (GO:0097201) | 14                                                  | 3              | 0.13                | +                     | 22.55                      | 5.07E-04               | 3.30E-02       |
| positive regulation of mitochondrial fission (GO:0090141)                                               | 15                                                  | 3              | 0.14                | +                     | 21.04                      | 6.04E-04               | 3.81E-02       |
| regulation of autophagy of mitochondrion (GO:1903146)                                                   | 33                                                  | 6              | 0.31                | +                     | 19.13                      | 1.63E-06               | 4.42E-04       |
| positive regulation of autophagy of mitochondrion (GO:1903599)                                          | 17                                                  | 3              | 0.16                | +                     | 18.57                      | 8.33E-04               | 5.00E-02       |
| positive regulation of release of cytochrome c from mitochondria (GO:0090200)                           | 30                                                  | 4              | 0.29                | +                     | 14.03                      | 2.83E-04               | 2.10E-02       |
| glycogen metabolic process (GO:0005977)                                                                 | 49                                                  | 6              | 0.47                | +                     | 12.88                      | 1.28E-05               | 2.01E-03       |
| cellular glucan metabolic process (GO:0006073)                                                          | 49                                                  | 6              | 0.47                | +                     | 12.88                      | 1.28E-05               | 1.99E-03       |
| glucan metabolic process (GO:0044042)                                                                   | 49                                                  | 6              | 0.47                | +                     | 12.88                      | 1.28E-05               | 1.97E-03       |
| cellular response to glucose starvation (GO:0042149)                                                    | 43                                                  | 5              | 0.41                | +                     | 12.23                      | 8.68E-05               | 8.43E-03       |
| negative regulation of leukocyte migration (GO:0002686)                                                 | 43                                                  | 5              | 0.41                | +                     | 12.23                      | 8.68E-05               | 8.38E-03       |
| cell-substrate junction assembly (GO:0007044)                                                           | 35                                                  | 4              | 0.33                | +                     | 12.03                      | 4.85E-04               | 3.21E-02       |
| platelet-derived growth factor receptor signaling pathway (GO:0048008)                                  | 36                                                  | 4              | 0.34                | +                     | 11.69                      | 5.35E-04               | 3.43E-02       |
| negative regulation of cell-matrix adhesion (GO:0001953)                                                | 37                                                  | 4              | 0.35                | +                     | 11.38                      | 5.88E-04               | 3.73E-02       |
| energy reserve metabolic process (GO:0006112)                                                           | 59                                                  | 6              | 0.56                | +                     | 10.7                       | 3.37E-05               | 3.85E-03       |
| regulation of release of cytochrome c from mitochondria (GO:0090199)                                    | 50                                                  | 5              | 0.48                | +                     | 10.52                      | 1.67E-04               | 1.42E-02       |
| ribonucleoside diphosphate metabolic process (GO:0009185)                                               | 81                                                  | 8              | 0.77                | +                     | 10.39                      | 1.98E-06               | 5.11E-04       |
| negative regulation of reactive oxygen species metabolic process (GO:2000378)                           | 71                                                  | 7              | 0.67                | +                     | 10.37                      | 8.87E-06               | 1.63E-03       |
| positive regulation of mitochondrion organization (GO:0010822)                                          | 72                                                  | 7              | 0.68                | +                     | 10.23                      | 9.66E-06               | 1.66E-03       |
| negative regulation of lipid biosynthetic process (GO:0051055)                                          | 52                                                  | 5              | 0.49                | +                     | 10.12                      | 1.98E-04               | 1.58E-02       |
| negative regulation of mitochondrion organization (GO:0010823)                                          | 52                                                  | 5              | 0.49                | +                     | 10.12                      | 1.98E-04               | 1.57E-02       |
| cellular response to hypoxia (GO:0071456)                                                               | 159                                                 | 15             | 1.51                | +                     | 9.93                       | 1.08E-10               | 1.58E-07       |
| cellular response to decreased oxygen levels (GO:0036294)                                               | 172                                                 | 16             | 1.63                | +                     | 9.79                       | 3.08E-11               | 6.16E-08       |

|                                                                      |     |    |      |   |      |          |          |
|----------------------------------------------------------------------|-----|----|------|---|------|----------|----------|
| purine ribonucleoside diphosphate metabolic process (GO:0009179)     | 78  | 7  | 0.74 | + | 9.44 | 1.57E-05 | 2.29E-03 |
| purine nucleoside diphosphate metabolic process (GO:0009135)         | 78  | 7  | 0.74 | + | 9.44 | 1.57E-05 | 2.26E-03 |
| regulation of focal adhesion assembly (GO:0051893)                   | 58  | 5  | 0.55 | + | 9.07 | 3.18E-04 | 2.30E-02 |
| regulation of cell-substrate junction assembly (GO:0090109)          | 58  | 5  | 0.55 | + | 9.07 | 3.18E-04 | 2.29E-02 |
| regulation of mitochondrion organization (GO:0010821)                | 130 | 11 | 1.24 | + | 8.9  | 9.94E-08 | 4.19E-05 |
| ADP metabolic process (GO:0046031)                                   | 71  | 6  | 0.67 | + | 8.89 | 8.80E-05 | 8.44E-03 |
| cellular response to oxygen levels (GO:0071453)                      | 191 | 16 | 1.82 | + | 8.81 | 1.31E-10 | 1.50E-07 |
| negative regulation of cell-substrate adhesion (GO:0010812)          | 60  | 5  | 0.57 | + | 8.77 | 3.68E-04 | 2.57E-02 |
| carbohydrate catabolic process (GO:0016052)                          | 110 | 9  | 1.05 | + | 8.61 | 1.93E-06 | 5.06E-04 |
| nucleoside diphosphate metabolic process (GO:0009132)                | 98  | 8  | 0.93 | + | 8.59 | 7.37E-06 | 1.42E-03 |
| glycolytic process (GO:0006096)                                      | 62  | 5  | 0.59 | + | 8.49 | 4.24E-04 | 2.89E-02 |
| cellular polysaccharide metabolic process (GO:0044264)               | 75  | 6  | 0.71 | + | 8.42 | 1.17E-04 | 1.06E-02 |
| polysaccharide metabolic process (GO:0005976)                        | 76  | 6  | 0.72 | + | 8.31 | 1.25E-04 | 1.12E-02 |
| response to hypoxia (GO:0001666)                                     | 408 | 32 | 3.88 | + | 8.25 | 2.20E-19 | 3.53E-15 |
| ATP generation from ADP (GO:0006757)                                 | 64  | 5  | 0.61 | + | 8.22 | 4.85E-04 | 3.20E-02 |
| regulation of adherens junction organization (GO:1903391)            | 64  | 5  | 0.61 | + | 8.22 | 4.85E-04 | 3.19E-02 |
| apoptotic mitochondrial changes (GO:0008637)                         | 65  | 5  | 0.62 | + | 8.09 | 5.19E-04 | 3.37E-02 |
| response to decreased oxygen levels (GO:0036293)                     | 423 | 32 | 4.02 | + | 7.96 | 5.96E-19 | 4.77E-15 |
| response to unfolded protein (GO:0006986)                            | 93  | 7  | 0.88 | + | 7.92 | 4.52E-05 | 4.79E-03 |
| nucleoside diphosphate phosphorylation (GO:0006165)                  | 81  | 6  | 0.77 | + | 7.79 | 1.73E-04 | 1.44E-02 |
| regulation of mitochondrial membrane potential (GO:0051881)          | 82  | 6  | 0.78 | + | 7.7  | 1.85E-04 | 1.50E-02 |
| nucleotide phosphorylation (GO:0046939)                              | 83  | 6  | 0.79 | + | 7.61 | 1.96E-04 | 1.57E-02 |
| cellular response to unfolded protein (GO:0034620)                   | 71  | 5  | 0.67 | + | 7.41 | 7.57E-04 | 4.59E-02 |
| pyruvate metabolic process (GO:0006090)                              | 86  | 6  | 0.82 | + | 7.34 | 2.35E-04 | 1.81E-02 |
| response to oxygen levels (GO:0070482)                               | 463 | 32 | 4.4  | + | 7.27 | 7.07E-18 | 3.78E-14 |
| regulation of cell-matrix adhesion (GO:0001952)                      | 116 | 8  | 1.1  | + | 7.26 | 2.33E-05 | 2.89E-03 |
| regulation of ATP metabolic process (GO:1903578)                     | 90  | 6  | 0.86 | + | 7.01 | 2.97E-04 | 2.18E-02 |
| extrinsic apoptotic signaling pathway (GO:0097191)                   | 91  | 6  | 0.86 | + | 6.94 | 3.14E-04 | 2.29E-02 |
| cellular response to starvation (GO:0009267)                         | 162 | 10 | 1.54 | + | 6.5  | 5.59E-06 | 1.16E-03 |
| glucose metabolic process (GO:0006006)                               | 98  | 6  | 0.93 | + | 6.44 | 4.56E-04 | 3.05E-02 |
| response to topologically incorrect protein (GO:0035966)             | 116 | 7  | 1.1  | + | 6.35 | 1.67E-04 | 1.43E-02 |
| response to starvation (GO:0042594)                                  | 223 | 13 | 2.12 | + | 6.13 | 4.00E-07 | 1.46E-04 |
| cellular modified amino acid metabolic process (GO:0006575)          | 177 | 10 | 1.68 | + | 5.94 | 1.17E-05 | 1.93E-03 |
| positive regulation of autophagy (GO:0010508)                        | 145 | 8  | 1.38 | + | 5.81 | 1.04E-04 | 9.66E-03 |
| hexose metabolic process (GO:0019318)                                | 128 | 7  | 1.22 | + | 5.75 | 2.96E-04 | 2.19E-02 |
| regulation of cellular ketone metabolic process (GO:0010565)         | 130 | 7  | 1.24 | + | 5.67 | 3.24E-04 | 2.33E-02 |
| negative regulation of immune effector process (GO:0002698)          | 135 | 7  | 1.28 | + | 5.46 | 4.02E-04 | 2.78E-02 |
| cellular carbohydrate metabolic process (GO:0044262)                 | 158 | 8  | 1.5  | + | 5.33 | 1.82E-04 | 1.49E-02 |
| regulation of reactive oxygen species metabolic process (GO:2000377) | 205 | 10 | 1.95 | + | 5.13 | 3.88E-05 | 4.31E-03 |
| regulation of angiogenesis (GO:0045765)                              | 297 | 14 | 2.82 | + | 4.96 | 1.60E-06 | 4.43E-04 |
| cellular response to nutrient levels (GO:0031669)                    | 263 | 12 | 2.5  | + | 4.8  | 1.24E-05 | 2.00E-03 |
| regulation of vasculature development (GO:1901342)                   | 330 | 15 | 3.14 | + | 4.78 | 1.04E-06 | 3.04E-04 |
| positive regulation of angiogenesis (GO:0045766)                     | 178 | 8  | 1.69 | + | 4.73 | 3.93E-04 | 2.73E-02 |
| cellular response to insulin stimulus (GO:0032869)                   | 181 | 8  | 1.72 | + | 4.65 | 4.37E-04 | 2.94E-02 |

|                                                                               |      |    |       |   |      |          |          |
|-------------------------------------------------------------------------------|------|----|-------|---|------|----------|----------|
| response to insulin (GO:0032868)                                              | 272  | 12 | 2.59  | + | 4.64 | 1.70E-05 | 2.36E-03 |
| apoptotic signaling pathway (GO:0097190)                                      | 273  | 12 | 2.59  | + | 4.63 | 1.77E-05 | 2.38E-03 |
| cellular response to extracellular stimulus (GO:0031668)                      | 299  | 13 | 2.84  | + | 4.57 | 8.79E-06 | 1.64E-03 |
| negative regulation of cellular component movement (GO:0051271)               | 325  | 14 | 3.09  | + | 4.53 | 4.37E-06 | 9.72E-04 |
| response to temperature stimulus (GO:0009266)                                 | 233  | 10 | 2.21  | + | 4.52 | 1.08E-04 | 9.92E-03 |
| extracellular matrix organization (GO:0030198)                                | 234  | 10 | 2.22  | + | 4.5  | 1.11E-04 | 1.01E-02 |
| alpha-amino acid metabolic process (GO:1901605)                               | 189  | 8  | 1.8   | + | 4.45 | 5.75E-04 | 3.67E-02 |
| negative regulation of cell motility (GO:2000146)                             | 290  | 12 | 2.76  | + | 4.35 | 3.12E-05 | 3.65E-03 |
| regulation of cell-substrate adhesion (GO:0010810)                            | 218  | 9  | 2.07  | + | 4.34 | 3.13E-04 | 2.29E-02 |
| regulation of autophagy (GO:0010506)                                          | 268  | 11 | 2.55  | + | 4.32 | 7.17E-05 | 7.32E-03 |
| female pregnancy (GO:0007565)                                                 | 269  | 11 | 2.56  | + | 4.3  | 7.40E-05 | 7.46E-03 |
| positive regulation of vasculature development (GO:1904018)                   | 197  | 8  | 1.87  | + | 4.27 | 7.46E-04 | 4.56E-02 |
| negative regulation of cell migration (GO:0030336)                            | 274  | 11 | 2.6   | + | 4.22 | 8.67E-05 | 8.47E-03 |
| response to estradiol (GO:0032355)                                            | 251  | 10 | 2.39  | + | 4.19 | 1.93E-04 | 1.56E-02 |
| multi-multicellular organism process (GO:0044706)                             | 303  | 12 | 2.88  | + | 4.17 | 4.70E-05 | 4.95E-03 |
| response to monosaccharide (GO:0034284)                                       | 228  | 9  | 2.17  | + | 4.15 | 4.29E-04 | 2.91E-02 |
| negative regulation of cell adhesion (GO:0007162)                             | 279  | 11 | 2.65  | + | 4.15 | 1.01E-04 | 9.48E-03 |
| negative regulation of locomotion (GO:0040013)                                | 341  | 13 | 3.24  | + | 4.01 | 3.31E-05 | 3.82E-03 |
| response to abiotic stimulus (GO:0009628)                                     | 1364 | 52 | 12.96 | + | 4.01 | 7.59E-18 | 3.04E-14 |
| cellular response to external stimulus (GO:0071496)                           | 399  | 15 | 3.79  | + | 3.96 | 9.58E-06 | 1.67E-03 |
| extracellular structure organization (GO:0043062)                             | 269  | 10 | 2.56  | + | 3.91 | 3.28E-04 | 2.35E-02 |
| positive regulation of catabolic process (GO:0009896)                         | 449  | 16 | 4.27  | + | 3.75 | 9.17E-06 | 1.63E-03 |
| transmembrane receptor protein tyrosine kinase signaling pathway (GO:0007169) | 339  | 12 | 3.22  | + | 3.72 | 1.31E-04 | 1.17E-02 |
| carbohydrate metabolic process (GO:0005975)                                   | 428  | 15 | 4.07  | + | 3.69 | 2.12E-05 | 2.72E-03 |
| regulation of catabolic process (GO:0009894)                                  | 845  | 29 | 8.03  | + | 3.61 | 3.72E-09 | 2.60E-06 |
| generation of precursor metabolites and energy (GO:0006091)                   | 351  | 12 | 3.34  | + | 3.6  | 1.79E-04 | 1.47E-02 |
| regulation of small molecule metabolic process (GO:0062012)                   | 336  | 11 | 3.19  | + | 3.44 | 4.73E-04 | 3.14E-02 |
| regulation of neuron death (GO:1901214)                                       | 378  | 12 | 3.59  | + | 3.34 | 3.44E-04 | 2.45E-02 |
| regulation of cell migration (GO:0030334)                                     | 897  | 28 | 8.52  | + | 3.28 | 5.02E-08 | 2.52E-05 |
| regulation of immune effector process (GO:0002697)                            | 397  | 12 | 3.77  | + | 3.18 | 5.26E-04 | 3.38E-02 |
| regulation of cellular component movement (GO:0051270)                        | 1033 | 31 | 9.82  | + | 3.16 | 2.13E-08 | 1.22E-05 |
| programmed cell death (GO:0012501)                                            | 735  | 22 | 6.99  | + | 3.15 | 2.96E-06 | 7.08E-04 |
| cell death (GO:0008219)                                                       | 775  | 23 | 7.37  | + | 3.12 | 2.00E-06 | 5.08E-04 |
| positive regulation of cell death (GO:0010942)                                | 710  | 21 | 6.75  | + | 3.11 | 6.02E-06 | 1.22E-03 |
| regulation of cell motility (GO:2000145)                                      | 948  | 28 | 9.01  | + | 3.11 | 1.52E-07 | 6.11E-05 |
| response to peptide hormone (GO:0043434)                                      | 509  | 15 | 4.84  | + | 3.1  | 1.40E-04 | 1.24E-02 |
| aging (GO:0007568)                                                            | 447  | 13 | 4.25  | + | 3.06 | 4.41E-04 | 2.96E-02 |
| regulation of cell adhesion (GO:0030155)                                      | 690  | 20 | 6.56  | + | 3.05 | 1.35E-05 | 2.04E-03 |
| apoptotic process (GO:0006915)                                                | 701  | 20 | 6.66  | + | 3    | 1.68E-05 | 2.36E-03 |
| regulation of cellular catabolic process (GO:0031329)                         | 703  | 20 | 6.68  | + | 2.99 | 1.75E-05 | 2.38E-03 |
| response to peptide (GO:1901652)                                              | 598  | 17 | 5.68  | + | 2.99 | 7.71E-05 | 7.73E-03 |
| regulation of locomotion (GO:0040012)                                         | 1023 | 29 | 9.72  | + | 2.98 | 2.06E-07 | 8.07E-05 |
| enzyme linked receptor protein signaling pathway (GO:0007167)                 | 530  | 15 | 5.04  | + | 2.98 | 2.15E-04 | 1.68E-02 |
| response to extracellular stimulus (GO:0009991)                               | 747  | 21 | 7.1   | + | 2.96 | 1.27E-05 | 2.03E-03 |

|                                                                                      |      |    |       |   |      |          |          |
|--------------------------------------------------------------------------------------|------|----|-------|---|------|----------|----------|
| negative regulation of cell population proliferation (GO:0008285)                    | 680  | 19 | 6.46  | + | 2.94 | 3.63E-05 | 4.10E-03 |
| response to nutrient levels (GO:0031667)                                             | 717  | 20 | 6.81  | + | 2.94 | 2.30E-05 | 2.88E-03 |
| negative regulation of immune system process (GO:0002683)                            | 468  | 13 | 4.45  | + | 2.92 | 6.69E-04 | 4.14E-02 |
| positive regulation of organelle organization (GO:0010638)                           | 593  | 16 | 5.64  | + | 2.84 | 2.24E-04 | 1.73E-02 |
| cellular response to lipid (GO:0071396)                                              | 633  | 17 | 6.02  | + | 2.83 | 1.50E-04 | 1.29E-02 |
| cellular response to stress (GO:0033554)                                             | 1540 | 41 | 14.64 | + | 2.8  | 2.37E-09 | 1.81E-06 |
| positive regulation of apoptotic process (GO:0043065)                                | 642  | 17 | 6.1   | + | 2.79 | 1.76E-04 | 1.46E-02 |
| negative regulation of cellular biosynthetic process (GO:0031327)                    | 1476 | 39 | 14.03 | + | 2.78 | 7.73E-09 | 4.96E-06 |
| positive regulation of programmed cell death (GO:0043068)                            | 647  | 17 | 6.15  | + | 2.76 | 1.93E-04 | 1.55E-02 |
| regulation of cytokine production (GO:0001817)                                       | 691  | 18 | 6.57  | + | 2.74 | 1.38E-04 | 1.23E-02 |
| carboxylic acid metabolic process (GO:0019752)                                       | 811  | 21 | 7.71  | + | 2.72 | 4.11E-05 | 4.51E-03 |
| negative regulation of biosynthetic process (GO:0009890)                             | 1513 | 39 | 14.38 | + | 2.71 | 1.50E-08 | 8.88E-06 |
| negative regulation of transcription by RNA polymerase II (GO:0000122)               | 855  | 22 | 8.13  | + | 2.71 | 2.93E-05 | 3.51E-03 |
| positive regulation of cellular component movement (GO:0051272)                      | 587  | 15 | 5.58  | + | 2.69 | 6.09E-04 | 3.83E-02 |
| regulation of anatomical structure morphogenesis (GO:0022603)                        | 1057 | 27 | 10.05 | + | 2.69 | 3.87E-06 | 8.73E-04 |
| cellular response to hormone stimulus (GO:0032870)                                   | 667  | 17 | 6.34  | + | 2.68 | 2.72E-04 | 2.04E-02 |
| cellular response to cytokine stimulus (GO:0071345)                                  | 759  | 19 | 7.21  | + | 2.63 | 1.49E-04 | 1.29E-02 |
| response to cytokine (GO:0034097)                                                    | 894  | 22 | 8.5   | + | 2.59 | 5.60E-05 | 5.83E-03 |
| oxoacid metabolic process (GO:0043436)                                               | 854  | 21 | 8.12  | + | 2.59 | 8.42E-05 | 8.28E-03 |
| cellular response to organic cyclic compound (GO:0071407)                            | 654  | 16 | 6.22  | + | 2.57 | 6.35E-04 | 3.96E-02 |
| regulation of response to external stimulus (GO:0032101)                             | 944  | 23 | 8.97  | + | 2.56 | 4.37E-05 | 4.67E-03 |
| negative regulation of response to stimulus (GO:0048585)                             | 1563 | 38 | 14.85 | + | 2.56 | 1.05E-07 | 4.32E-05 |
| response to lipid (GO:0033993)                                                       | 1196 | 29 | 11.37 | + | 2.55 | 4.41E-06 | 9.69E-04 |
| response to hormone (GO:0009725)                                                     | 1200 | 29 | 11.4  | + | 2.54 | 4.70E-06 | 1.02E-03 |
| negative regulation of signal transduction (GO:0009968)                              | 1162 | 28 | 11.04 | + | 2.54 | 7.36E-06 | 1.44E-03 |
| organic acid metabolic process (GO:0006082)                                          | 879  | 21 | 8.35  | + | 2.51 | 1.25E-04 | 1.12E-02 |
| regulation of organelle organization (GO:0033043)                                    | 1228 | 29 | 11.67 | + | 2.48 | 7.24E-06 | 1.43E-03 |
| negative regulation of cellular macromolecule biosynthetic process (GO:2000113)      | 1364 | 32 | 12.96 | + | 2.47 | 3.80E-06 | 8.70E-04 |
| negative regulation of cell communication (GO:0010648)                               | 1284 | 30 | 12.2  | + | 2.46 | 8.77E-06 | 1.65E-03 |
| negative regulation of RNA biosynthetic process (GO:1902679)                         | 1201 | 28 | 11.41 | + | 2.45 | 1.97E-05 | 2.58E-03 |
| negative regulation of signaling (GO:0023057)                                        | 1287 | 30 | 12.23 | + | 2.45 | 8.96E-06 | 1.63E-03 |
| negative regulation of macromolecule biosynthetic process (GO:0010558)               | 1422 | 33 | 13.51 | + | 2.44 | 2.90E-06 | 7.03E-04 |
| negative regulation of developmental process (GO:0051093)                            | 1038 | 24 | 9.86  | + | 2.43 | 9.96E-05 | 9.39E-03 |
| negative regulation of gene expression (GO:0010629)                                  | 1601 | 37 | 15.22 | + | 2.43 | 6.41E-07 | 2.10E-04 |
| negative regulation of cellular metabolic process (GO:0031324)                       | 2512 | 58 | 23.87 | + | 2.43 | 1.15E-10 | 1.53E-07 |
| negative regulation of multicellular organismal process (GO:0051241)                 | 1301 | 30 | 12.36 | + | 2.43 | 1.01E-05 | 1.72E-03 |
| negative regulation of transcription, DNA-templated (GO:0045892)                     | 1172 | 27 | 11.14 | + | 2.42 | 3.23E-05 | 3.75E-03 |
| response to organonitrogen compound (GO:0010243)                                     | 1265 | 29 | 12.02 | + | 2.41 | 1.58E-05 | 2.27E-03 |
| negative regulation of nucleobase-containing compound metabolic process (GO:0045934) | 1396 | 32 | 13.27 | + | 2.41 | 5.06E-06 | 1.07E-03 |

|                                                                          |      |    |       |   |      |          |          |
|--------------------------------------------------------------------------|------|----|-------|---|------|----------|----------|
| small molecule metabolic process (GO:0044281)                            | 1490 | 34 | 14.16 | + | 2.4  | 2.54E-06 | 6.36E-04 |
| cellular response to organic substance (GO:0071310)                      | 2194 | 50 | 20.85 | + | 2.4  | 5.09E-09 | 3.40E-06 |
| negative regulation of apoptotic process (GO:0043066)                    | 925  | 21 | 8.79  | + | 2.39 | 3.52E-04 | 2.49E-02 |
| negative regulation of metabolic process (GO:0009892)                    | 2775 | 63 | 26.37 | + | 2.39 | 3.47E-11 | 6.17E-08 |
| response to stress (GO:0006950)                                          | 3196 | 72 | 30.37 | + | 2.37 | 7.30E-13 | 2.34E-09 |
| negative regulation of nucleic acid-templated transcription (GO:1903507) | 1199 | 27 | 11.4  | + | 2.37 | 4.14E-05 | 4.52E-03 |
| negative regulation of RNA metabolic process (GO:0051253)                | 1288 | 29 | 12.24 | + | 2.37 | 2.00E-05 | 2.59E-03 |
| regulation of cell death (GO:0010941)                                    | 1698 | 38 | 16.14 | + | 2.35 | 8.38E-07 | 2.53E-04 |
| regulation of transferase activity (GO:0051338)                          | 897  | 20 | 8.52  | + | 2.35 | 5.76E-04 | 3.66E-02 |
| negative regulation of programmed cell death (GO:0043069)                | 943  | 21 | 8.96  | + | 2.34 | 4.05E-04 | 2.79E-02 |
| response to nitrogen compound (GO:1901698)                               | 1349 | 30 | 12.82 | + | 2.34 | 1.68E-05 | 2.35E-03 |
| cellular response to chemical stimulus (GO:0070887)                      | 2748 | 60 | 26.12 | + | 2.3  | 6.34E-10 | 5.34E-07 |
| negative regulation of cell death (GO:0060548)                           | 1055 | 23 | 10.03 | + | 2.29 | 2.48E-04 | 1.86E-02 |
| circulatory system development (GO:0072359)                              | 925  | 20 | 8.79  | + | 2.28 | 7.40E-04 | 4.54E-02 |
| response to organic cyclic compound (GO:0014070)                         | 1308 | 28 | 12.43 | + | 2.25 | 9.04E-05 | 8.62E-03 |
| regulation of programmed cell death (GO:0043067)                         | 1544 | 33 | 14.67 | + | 2.25 | 1.55E-05 | 2.27E-03 |
| response to oxygen-containing compound (GO:1901700)                      | 1968 | 42 | 18.7  | + | 2.25 | 6.91E-07 | 2.17E-04 |
| positive regulation of protein metabolic process (GO:0051247)            | 1693 | 36 | 16.09 | + | 2.24 | 5.90E-06 | 1.21E-03 |
| negative regulation of nitrogen compound metabolic process (GO:0051172)  | 2309 | 49 | 21.94 | + | 2.23 | 8.64E-08 | 3.74E-05 |
| response to organic substance (GO:0010033)                               | 3175 | 67 | 30.17 | + | 2.22 | 1.37E-10 | 1.46E-07 |
| regulation of cell population proliferation (GO:0042127)                 | 1659 | 35 | 15.77 | + | 2.22 | 9.47E-06 | 1.67E-03 |
| regulation of apoptotic process (GO:0042981)                             | 1520 | 32 | 14.45 | + | 2.22 | 2.67E-05 | 3.25E-03 |
| positive regulation of catalytic activity (GO:0043085)                   | 1259 | 26 | 11.97 | + | 2.17 | 2.44E-04 | 1.85E-02 |
| cellular response to oxygen-containing compound (GO:1901701)             | 1216 | 25 | 11.56 | + | 2.16 | 3.53E-04 | 2.48E-02 |
| cell surface receptor signaling pathway (GO:0007166)                     | 1706 | 35 | 16.21 | + | 2.16 | 2.14E-05 | 2.73E-03 |
| positive regulation of cellular metabolic process (GO:0031325)           | 3281 | 67 | 31.18 | + | 2.15 | 5.33E-10 | 4.75E-07 |
| positive regulation of metabolic process (GO:0009893)                    | 3559 | 72 | 33.82 | + | 2.13 | 1.53E-10 | 1.53E-07 |
| positive regulation of cellular protein metabolic process (GO:0032270)   | 1591 | 32 | 15.12 | + | 2.12 | 7.22E-05 | 7.32E-03 |
| proteolysis (GO:0006508)                                                 | 1145 | 23 | 10.88 | + | 2.11 | 8.20E-04 | 4.94E-02 |
| response to endogenous stimulus (GO:0009719)                             | 1749 | 35 | 16.62 | + | 2.11 | 2.96E-05 | 3.51E-03 |
| organic substance catabolic process (GO:1901575)                         | 1459 | 29 | 13.87 | + | 2.09 | 2.14E-04 | 1.68E-02 |
| negative regulation of macromolecule metabolic process (GO:0010605)      | 2516 | 50 | 23.91 | + | 2.09 | 5.19E-07 | 1.81E-04 |
| regulation of localization (GO:0032879)                                  | 2875 | 57 | 27.32 | + | 2.09 | 4.76E-08 | 2.46E-05 |
| response to external stimulus (GO:0009605)                               | 2432 | 48 | 23.11 | + | 2.08 | 1.15E-06 | 3.29E-04 |
| regulation of protein modification process (GO:0031399)                  | 1827 | 36 | 17.36 | + | 2.07 | 4.02E-05 | 4.44E-03 |
| response to other organism (GO:0051707)                                  | 1219 | 24 | 11.59 | + | 2.07 | 7.49E-04 | 4.56E-02 |
| response to external biotic stimulus (GO:0043207)                        | 1223 | 24 | 11.62 | + | 2.06 | 7.77E-04 | 4.70E-02 |
| regulation of response to stress (GO:0080134)                            | 1337 | 26 | 12.71 | + | 2.05 | 6.59E-04 | 4.10E-02 |
| regulation of immune system process (GO:0002682)                         | 1389 | 27 | 13.2  | + | 2.05 | 4.86E-04 | 3.18E-02 |
| regulation of multicellular organismal development (GO:2000026)          | 2113 | 41 | 20.08 | + | 2.04 | 1.55E-05 | 2.29E-03 |
| homeostatic process (GO:0042592)                                         | 1653 | 32 | 15.71 | + | 2.04 | 1.73E-04 | 1.44E-02 |

|                                                                             |      |     |       |   |      |          |          |
|-----------------------------------------------------------------------------|------|-----|-------|---|------|----------|----------|
| positive regulation of nitrogen compound metabolic process (GO:0051173)     | 3122 | 60  | 29.67 | + | 2.02 | 7.09E-08 | 3.16E-05 |
| positive regulation of multicellular organismal process (GO:0051240)        | 1935 | 37  | 18.39 | + | 2.01 | 4.29E-05 | 4.62E-03 |
| regulation of catalytic activity (GO:0050790)                               | 2112 | 40  | 20.07 | + | 1.99 | 2.75E-05 | 3.31E-03 |
| regulation of phosphate metabolic process (GO:0019220)                      | 1755 | 33  | 16.68 | + | 1.98 | 1.70E-04 | 1.45E-02 |
| regulation of phosphorus metabolic process (GO:0051174)                     | 1756 | 33  | 16.69 | + | 1.98 | 1.72E-04 | 1.45E-02 |
| regulation of protein metabolic process (GO:0051246)                        | 2750 | 51  | 26.14 | + | 1.95 | 2.64E-06 | 6.52E-04 |
| regulation of developmental process (GO:0050793)                            | 2644 | 49  | 25.13 | + | 1.95 | 5.04E-06 | 1.08E-03 |
| phosphate-containing compound metabolic process (GO:0006796)                | 1836 | 34  | 17.45 | + | 1.95 | 2.16E-04 | 1.68E-02 |
| negative regulation of cellular process (GO:0048523)                        | 4596 | 85  | 43.68 | + | 1.95 | 9.69E-11 | 1.55E-07 |
| positive regulation of molecular function (GO:0044093)                      | 1634 | 30  | 15.53 | + | 1.93 | 5.19E-04 | 3.35E-02 |
| phosphorus metabolic process (GO:0006793)                                   | 1856 | 34  | 17.64 | + | 1.93 | 2.40E-04 | 1.84E-02 |
| positive regulation of macromolecule metabolic process (GO:0010604)         | 3281 | 60  | 31.18 | + | 1.92 | 4.11E-07 | 1.46E-04 |
| regulation of multicellular organismal process (GO:0051239)                 | 3175 | 58  | 30.17 | + | 1.92 | 8.25E-07 | 2.54E-04 |
| regulation of cellular metabolic process (GO:0031323)                       | 5533 | 100 | 52.58 | + | 1.9  | 1.60E-12 | 4.26E-09 |
| regulation of transcription by RNA polymerase II (GO:0006357)               | 2004 | 36  | 19.05 | + | 1.89 | 2.41E-04 | 1.83E-02 |
| regulation of cellular protein metabolic process (GO:0032268)               | 2572 | 46  | 24.44 | + | 1.88 | 3.06E-05 | 3.61E-03 |
| regulation of nitrogen compound metabolic process (GO:0051171)              | 5200 | 92  | 49.42 | + | 1.86 | 1.16E-10 | 1.43E-07 |
| negative regulation of biological process (GO:0048519)                      | 5097 | 90  | 48.44 | + | 1.86 | 2.66E-10 | 2.50E-07 |
| regulation of cellular biosynthetic process (GO:0031326)                    | 3584 | 63  | 34.06 | + | 1.85 | 6.77E-07 | 2.17E-04 |
| regulation of nucleobase-containing compound metabolic process (GO:0019219) | 3419 | 60  | 32.49 | + | 1.85 | 1.81E-06 | 4.84E-04 |
| regulation of biosynthetic process (GO:0009889)                             | 3656 | 64  | 34.75 | + | 1.84 | 5.45E-07 | 1.86E-04 |
| regulation of metabolic process (GO:0019222)                                | 5923 | 103 | 56.29 | + | 1.83 | 8.49E-12 | 1.94E-08 |
| regulation of RNA biosynthetic process (GO:2001141)                         | 2942 | 51  | 27.96 | + | 1.82 | 2.21E-05 | 2.78E-03 |
| protein metabolic process (GO:0019538)                                      | 3802 | 65  | 36.13 | + | 1.8  | 1.23E-06 | 3.45E-04 |
| regulation of nucleic acid-templated transcription (GO:1903506)             | 2937 | 50  | 27.91 | + | 1.79 | 3.62E-05 | 4.12E-03 |
| regulation of transcription, DNA-templated (GO:0006355)                     | 2893 | 49  | 27.49 | + | 1.78 | 5.10E-05 | 5.34E-03 |
| organonitrogen compound metabolic process (GO:1901564)                      | 4670 | 79  | 44.38 | + | 1.78 | 5.21E-08 | 2.45E-05 |
| regulation of primary metabolic process (GO:0080090)                        | 5350 | 90  | 50.85 | + | 1.77 | 2.94E-09 | 2.14E-06 |
| regulation of signal transduction (GO:0009966)                              | 2921 | 49  | 27.76 | + | 1.77 | 8.23E-05 | 8.14E-03 |
| regulation of cellular component organization (GO:0051128)                  | 2459 | 41  | 23.37 | + | 1.75 | 3.69E-04 | 2.57E-02 |
| multi-organism process (GO:0051704)                                         | 2341 | 39  | 22.25 | + | 1.75 | 6.33E-04 | 3.96E-02 |
| regulation of RNA metabolic process (GO:0051252)                            | 3183 | 53  | 30.25 | + | 1.75 | 4.15E-05 | 4.50E-03 |
| regulation of macromolecule biosynthetic process (GO:0010556)               | 3435 | 57  | 32.65 | + | 1.75 | 2.00E-05 | 2.61E-03 |
| regulation of cellular macromolecule biosynthetic process (GO:2000112)      | 3317 | 55  | 31.52 | + | 1.74 | 2.53E-05 | 3.12E-03 |
| positive regulation of cellular process (GO:0048522)                        | 5324 | 88  | 50.6  | + | 1.74 | 1.28E-08 | 7.90E-06 |
| regulation of molecular function (GO:0065009)                               | 3038 | 50  | 28.87 | + | 1.73 | 1.09E-04 | 9.94E-03 |
| positive regulation of biological process (GO:0048518)                      | 5975 | 98  | 56.79 | + | 1.73 | 1.38E-09 | 1.10E-06 |
| regulation of gene expression (GO:0010468)                                  | 3781 | 62  | 35.93 | + | 1.73 | 1.17E-05 | 1.91E-03 |
| regulation of cell communication (GO:0010646)                               | 3330 | 54  | 31.65 | + | 1.71 | 6.06E-05 | 6.26E-03 |
| regulation of signaling (GO:0023051)                                        | 3347 | 54  | 31.81 | + | 1.7  | 9.16E-05 | 8.69E-03 |

|                                                                                     |       |     |        |   |        |          |          |
|-------------------------------------------------------------------------------------|-------|-----|--------|---|--------|----------|----------|
| regulation of macromolecule metabolic process (GO:0060255)                          | 5461  | 88  | 51.9   | + | 1.7    | 4.54E-08 | 2.51E-05 |
| regulation of biological quality (GO:0065008)                                       | 3947  | 63  | 37.51  | + | 1.68   | 1.73E-05 | 2.37E-03 |
| animal organ development (GO:0048513)                                               | 3394  | 54  | 32.26  | + | 1.67   | 1.04E-04 | 9.63E-03 |
| developmental process (GO:0032502)                                                  | 5559  | 87  | 52.83  | + | 1.65   | 3.13E-07 | 1.19E-04 |
| system development (GO:0048731)                                                     | 4478  | 69  | 42.56  | + | 1.62   | 1.93E-05 | 2.56E-03 |
| multicellular organism development (GO:0007275)                                     | 4872  | 75  | 46.3   | + | 1.62   | 7.13E-06 | 1.43E-03 |
| macromolecule metabolic process (GO:0043170)                                        | 5399  | 82  | 51.31  | + | 1.6    | 3.12E-06 | 7.36E-04 |
| primary metabolic process (GO:0044238)                                              | 6604  | 100 | 62.76  | + | 1.59   | 6.92E-08 | 3.17E-05 |
| regulation of response to stimulus (GO:0048583)                                     | 3897  | 59  | 37.04  | + | 1.59   | 1.72E-04 | 1.44E-02 |
| nitrogen compound metabolic process (GO:0006807)                                    | 6077  | 91  | 57.75  | + | 1.58   | 1.02E-06 | 3.03E-04 |
| organic substance metabolic process (GO:0071704)                                    | 7012  | 105 | 66.64  | + | 1.58   | 4.64E-08 | 2.48E-05 |
| anatomical structure development (GO:0048856)                                       | 5239  | 78  | 49.79  | + | 1.57   | 1.27E-05 | 2.02E-03 |
| response to chemical (GO:0042221)                                                   | 5308  | 79  | 50.45  | + | 1.57   | 1.33E-05 | 2.03E-03 |
| cellular macromolecule metabolic process (GO:0044260)                               | 4271  | 63  | 40.59  | + | 1.55   | 2.02E-04 | 1.60E-02 |
| metabolic process (GO:0008152)                                                      | 7516  | 110 | 71.43  | + | 1.54   | 5.18E-08 | 2.52E-05 |
| cellular metabolic process (GO:0044237)                                             | 6675  | 94  | 63.44  | + | 1.48   | 9.11E-06 | 1.64E-03 |
| cellular response to stimulus (GO:0051716)                                          | 6811  | 91  | 64.73  | + | 1.41   | 1.46E-04 | 1.28E-02 |
| response to stimulus (GO:0050896)                                                   | 8503  | 112 | 80.81  | + | 1.39   | 1.40E-05 | 2.09E-03 |
| regulation of cellular process (GO:0050794)                                         | 10795 | 129 | 102.59 | + | 1.26   | 2.40E-04 | 1.83E-02 |
| biological regulation (GO:0065007)                                                  | 12088 | 143 | 114.88 | + | 1.24   | 6.57E-05 | 6.75E-03 |
| regulation of biological process (GO:0050789)                                       | 11421 | 133 | 108.54 | + | 1.23   | 6.80E-04 | 4.19E-02 |
| cellular process (GO:0009987)                                                       | 14066 | 159 | 133.68 | + | 1.19   | 1.47E-04 | 1.28E-02 |
| G protein-coupled receptor signaling pathway (GO:0007186)                           | 2057  | 6   | 19.55  | - | 0.31   | 4.35E-04 | 2.94E-02 |
| sensory perception of chemical stimulus (GO:0007606)                                | 1298  | 1   | 12.34  | - | 0.08   | 8.04E-05 | 8.01E-03 |
| detection of stimulus (GO:0051606)                                                  | 1386  | 1   | 13.17  | - | 0.08   | 3.67E-05 | 4.12E-03 |
| detection of chemical stimulus involved in sensory perception of smell (GO:0050911) | 1160  | 0   | 11.02  | - | < 0.01 | 2.59E-05 | 3.17E-03 |
| detection of chemical stimulus involved in sensory perception (GO:0050907)          | 1217  | 0   | 11.57  | - | < 0.01 | 1.10E-05 | 1.86E-03 |
| detection of stimulus involved in sensory perception (GO:0050906)                   | 1291  | 0   | 12.27  | - | < 0.01 | 7.68E-06 | 1.47E-03 |
| detection of chemical stimulus (GO:0009593)                                         | 1248  | 0   | 11.86  | - | < 0.01 | 1.16E-05 | 1.93E-03 |
| sensory perception of smell (GO:0007608)                                            | 1216  | 0   | 11.56  | - | < 0.01 | 1.82E-05 | 2.43E-03 |
