# Supplementary material for: OUP accepted manuscript
Source: Oxford University Press journal article supplement (doi:10.1093/database/baaa086), 2020-01-01
Supplement: baaa086_supp.zip [file baaa086_supp.zip]

Supplementary Table 9. Annotations reported by PRID/GSLA for the top 250 transcriptionally changed genes.

Job Number: GSLA08076795617586  
Cutoff used:  
Q1: density >= 0.015  
Q2: p <= 0.001  
Meaning:  
Q1: inter-geneset interaction density is greater than expected.  
Q2: the observed interaction density can only be observed in the biologically correct interactome topology.  
Categories selected: GO biological process  
Species: Rattus norvegicus  
Interaction dataset selected: PRID

#Subjob Number: GSLA08076795617586\_0  
#Description: #up-TOP250

#Quaried GeneSet: Mmp12, Ak4, Ankrd37, Fam65b, Kdm3a, Pygl, Zfp185, Aldoc, Ccl27, Gbe1, Gpt, LOC100911625///Eno2, Nol4, P4ha1, Basp1, Ctla2a, Ifi2712b, Nudt22, Spsb1, Arrdc3, LOC691807, Efemp2, Pdk1, Plod2, Rasd1, Tbl2, Ceacam15, Plpp1, Vegfa, Dlc1, Il1r2, Il33, Ddit4, Asic1, Dpp3///LOC678760///Dpp3, Stbd1, RGD1309104, Slc25a36, Acp5, Cd200, Slc35e1, Ppp1r3c, Bnip3, Nr4a3, Bhlhe40, Egln1, Il33, Mllt11, Narf, Pfkfb3, Rimkb, Tep1, Wwp1, Rcbtb1, Rcc1l, Greb1l, Pgm1, Guca1a, Phtf1, Vsir, Bcl11a, Casp6, Cdcpl1, Fam46a, Foxo3, Hk2, Kdr, Ndrgl, Pgm1, Ppm1j, Prepl, Spidr, Cdcpl1, Efemp2, Mmp9, Proser2, Vldlr, Gng2, Hspa1b///Hspa1a, Mysm1, Slc22a5, Ell, Greb1l, Noct, Vwa1, Ero1a, Hilpda, Il1rap, Klc4, Parp16, Scm1, Mab21l3, Vldlr, P4ha2, Ddx50, LOC100911293///LOC691658///Aph1b, Rnf138, Vegfa, Abhd18, Efna1, Higd1a, LOC102550354, Smtnl2, Zc3h7b, Cpm, Sec22b, Tiparp, LOC501445///Derl1, Dusp1, Adamts9, Eif2ak4, Higd1a, Id3, Map3k8, Slc27a1, Bnip3l, Fbln1, Insig2, Mex3b, Nptx1, Ramp3, RGD1560795///Spr, RGD1562037, Spsb1, Insig1, Insig2, Sphk1, Zfp503, Dnajb1, Tspo, Plau, Hp, Rnf125, Chpt1, Clcn3, Hmx1, Clcn3, Eif4e3, Nfil3, Bnip3l, Acvr1l, Gpr1, Syne1, Prkeq, Acap1, Eif4ebp1, Hltf, LOC100910685///Gcat, Pard6b, Wnt4, Cpm, LOC100909732///Fam122b, Maff, Mat2b, Foxo4, Gpi, LOC100912399///Map3k1, Appl1, Atp11b, Slc2a1, Tceal9, Ber, Arl16, Gzfl, Cdkn1b, Hagh, Hbp1, Rsrp1, Vldlr, Zap70, Arl16, LOC100910137///Triap1, Hspa1a, Il2rb, Alkbh5, Comt, Lrif1, Mmp9, Zmynd10, Rsrp1, Tspan33, LOC683062///Vdac1, Faslg, Ero1a, Prkag2, Vopp1, Ndrgl, Prrel, Zc3h7b, Sceph1, Entpd2, Lrrc8a, Cr1l, Hexb, Slc27a3, Arrdc3, Kdm4b, LOC102553917, Entpd4, Prkag2, Ccng2, Dst, Ksr1, Pdk1, LOC100911874///Slc40a1, Bcl6, Dnm1l, Rybp, Jmjd6, Bmt2, Hikeshi, Mnt, Slc6a8, Tomm7, Pfk1, Asic1, Dnajc3, Tpgs2, Dtna, Fcna, Cited2, Dennd3, Mllt3, Khnyn, Dnajb9, Tspan31, Actn1, Cblb, Upp1, Ifi27, Slc16a3, Kctd11, LOC100911642///LOC680835, Plin3, Kazald1, Asic1, Lrg1, Pglk1, Surf4, Arhgap8, Ctsm, Egln3, Xkr8, Mturn, Prrel, Sqle, Clcn3, Tmem59, Fizz1, Clcn3

| Term type             | Term       | Description                  | Term size | P value  | Density | Interaction number | Overlap gene number | Overlap gene(s) | Interactions                                                                                                                                                                                                                                                                                                                                                                                                                                                                                                                                                                                                |
|-----------------------|------------|------------------------------|-----------|----------|---------|--------------------|---------------------|-----------------|-------------------------------------------------------------------------------------------------------------------------------------------------------------------------------------------------------------------------------------------------------------------------------------------------------------------------------------------------------------------------------------------------------------------------------------------------------------------------------------------------------------------------------------------------------------------------------------------------------------|
| GO biological process | GO:0097194 | execution phase of apoptosis | 12        | 3.00E-04 | 0.01504 | 37                 | 0                   |                 | Appl1-RGD:2081 Appl1-RGD:708455 Arrdc3-RGD:2275 Comt-RGD:1561742 Acap1-RGD:2081 Foxo3-RGD:2081 Sec22b-RGD:620945 Sec22b-RGD:2275 Egln1-RGD:2081 Foxo4-RGD:2081 Vwa1-RGD:2081 Faslg-RGD:620945 Faslg-RGD:2275 Dnajc3-RGD:1561742 Hbp1-RGD:2081 Hspa1a-RGD:2081 Slc22a5-RGD:2081 Cblb-RGD:2275 Eif4ebp1-RGD:2081 Efna1-RGD:620945 Efna1-RGD:2275 Casp6-RGD:620945 Casp6-RGD:620944 Casp6-RGD:2275 Insig1-RGD:2081 Slc27a1-RGD:1562113 Nr4a3-RGD:2081 Nptx1-RGD:1562113 Vopp1-RGD:2081 Prrel-RGD:2081 Pfk1-RGD:619922 Ber-RGD:2081 Cdkn1b-RGD:2275 Vldlr-RGD:708455 Nol4-RGD:2081 Dusp1-RGD:2081 Dlc1-RGD:2081 |

|                       |            |                                                                                 |    |   |         |    |   |                               |                                                                                                                                                                                                                                                                                                                                                                                                                                                                                                                                                                                                                                                                                                                                                                                                                                                                                                                                                                                                                                                                                                                                        |
|-----------------------|------------|---------------------------------------------------------------------------------|----|---|---------|----|---|-------------------------------|----------------------------------------------------------------------------------------------------------------------------------------------------------------------------------------------------------------------------------------------------------------------------------------------------------------------------------------------------------------------------------------------------------------------------------------------------------------------------------------------------------------------------------------------------------------------------------------------------------------------------------------------------------------------------------------------------------------------------------------------------------------------------------------------------------------------------------------------------------------------------------------------------------------------------------------------------------------------------------------------------------------------------------------------------------------------------------------------------------------------------------------|
| GO biological process | GO:1902108 | regulation of mitochondrial membrane permeability involved in apoptotic process | 19 | 0 | 0.01771 | 69 | 1 | Bnip3                         | Sqle-RGD:2192 Gpt-RGD:1306551 Foxo3-RGD:3889 Sec22b-RGD:1306551 Sec22b-RGD:2261 Ero1a-RGD:2192 Ndr1-RGD:628774 Dnajc3-RGD:620160 Cblb-RGD:1306551 Eif4ebp1-RGD:3889 Kdm3a-RGD:3889 Tspo-RGD:620352 Tspo-RGD:620160 Tspo-Bnip3 Tspo-RGD:628774 Tspo-RGD:2192 Dnm1l-RGD:1308080 Dnm1l-RGD:620352 Dnm1l-RGD:620160 Dnm1l-RGD:628774 Dnm1l-RGD:708558 Dnm1l-RGD:727970 Bnip3-RGD:1308080 Bnip3-RGD:1307023 Bnip3-RGD:3889 Bnip3-RGD:620482 Bnip3-RGD:2261 Insig1-RGD:3889 Prkcq-RGD:3889 Prkcq-RGD:621862 Prkcq-RGD:2261 Tomm7-RGD:1307023 Tomm7-RGD:620160 Tomm7-Bnip3 Tomm7-RGD:708558 Higd1a-RGD:620352 Higd1a-RGD:2192 Higd1a-RGD:621862 Higd1a-RGD:708558 Higd1a-RGD:727970 Bnip3l-RGD:1308080 Bnip3l-RGD:620352 Bnip3l-Bnip3 Slc27a1-RGD:708558 Il3-RGD:620160 Clcn3-RGD:2192 Zmynd10-RGD:2192 Zmynd10-RGD:3889 Pdk1-RGD:708558 Pfk1-RGD:3889 Egln3-RGD:3889 Prepl-RGD:621862 Prepl-RGD:708558 Bcl6-RGD:3889 Vegfa-RGD:1306551 Eil-RGD:3889 Kdr-Bnip3 Kdr-RGD:2192 Kdr-RGD:3889 Actn1-RGD:2261 Vldlr-RGD:1306551 Vldlr-RGD:708558 Dnajb9-RGD:2192 Hk2-RGD:620352 Hk2-Bnip3 Hk2-RGD:2192 Hk2-RGD:620482 Hk2-RGD:708558 Hk2-RGD:727970 |
| GO biological process | GO:0071279 | cellular response to cobalt ion                                                 | 6  | 0 | 0.02195 | 27 | 1 | Bnip3                         | Bhlhe40-RGD:61928 Foxo3-RGD:61928 Alkbh5-RGD:619831 Egln1-RGD:61928 Hikeshi-RGD:619831 Faslg-RGD:619831 Hbp1-RGD:61928 Mmp12-RGD:2179 Kdm3a-RGD:61928 Tspo-Bnip3 Bnip3-RGD:631369 Bnip3-RGD:61928 Tomm7-RGD:1560038 Tomm7-Bnip3 Bnip3l-Bnip3 Dnajb1-RGD:61928 Wnt4-RGD:619831 Pdk1-RGD:61928 Pfk1-RGD:61928 Egln3-RGD:61928 Atp11b-RGD:2179 Vegfa-RGD:61928 Kdr-Bnip3 Pgk1-RGD:61928 Dnajb9-RGD:61928 Hk2-RGD:1560038 Hk2-Bnip3                                                                                                                                                                                                                                                                                                                                                                                                                                                                                                                                                                                                                                                                                                        |
| GO biological process | GO:0018401 | peptidyl-proline hydroxylation to 4-hydroxy-L-proline                           | 9  | 0 | 0.01571 | 29 | 5 | P4ha1 Egln3 Ero1a P4ha2 Egln1 | P4ha1-Egln3 P4ha1-RGD:3244 P4ha1-P4ha2 P4ha2-P4ha1 P4ha2-Egln3 P4ha2-RGD:3244 P4ha2-RGD:631376 P4ha2-Egln1 Alkbh5-RGD:3244 Ero1a-RGD:1563548 Ero1a-RGD:3244 Egln1-Egln3 Egln1-RGD:3244 Egln1-RGD:631376 Egln1-P4ha2 Dnajc3-RGD:620043 Surf4-RGD:3244 mjmd6-P4ha1 mjmd6-Egln3 Dnm1l-Egln3 Dnm1l-RGD:631376 Egln3-P4ha1 Egln3-RGD:631376 Egln3-P4ha2 Egln3-Egln1 Dnajb9-Ero1a Plod2-P4ha1 Plod2-RGD:3244 Plod2-P4ha2                                                                                                                                                                                                                                                                                                                                                                                                                                                                                                                                                                                                                                                                                                                     |
| GO biological process | GO:1905710 | positive regulation of membrane permeability                                    | 20 | 0 | 0.0156  | 64 | 2 | Bnip3 Bnip3                   | Sqle-RGD:2192 Gpt-RGD:1306551 Foxo3-RGD:3889 Sec22b-RGD:1306551 Ero1a-RGD:2192 Vwa1-RGD:3718 Ndr1-RGD:628774 Dnajc3-RGD:620160 Dnajc3-RGD:3718 Cblb-RGD:1306551 Eif4ebp1-RGD:3889 Kdm3a-RGD:3889 Tspo-RGD:620160 Tspo-Bnip3 Tspo-RGD:621252 Tspo-RGD:628774 Tspo-RGD:2192 Dnm1l-RGD:620160 Dnm1l-RGD:621252 Dnm1l-RGD:628774 Dnm1l-RGD:727970 Bnip3-Bnip3 Bnip3-RGD:1307023 Bnip3-RGD:3889 Hltf-RGD:621725 Insig1-RGD:3889 Prkcq-RGD:3889 Prkcq-RGD:621862 Tomm7-Bnip3 Tomm7-RGD:1307023 Tomm7-RGD:620160 Tomm7-RGD:727970 Bnip3l-Bnip3 Bnip3l-RGD:621252 Il3-RGD:620160 Clcn3-RGD:2192 Hp-RGD:621252 Zmynd10-RGD:2192 Zmynd10-RGD:3889 Pdk1-RGD:727940 Pfk1-RGD:3889 Egln3-RGD:3889 Prepl-RGD:621862 Bcr-RGD:621725 Bcl6-RGD:3889 Vegfa-RGD:1306551 Vegfa-RGD:621252 Eil-RGD:3889 Kdr-Bnip3 Kdr-RGD:621252 Kdr-RGD:2192 Kdr-RGD:3889 Vldlr-RGD:1306551 Dnajb9-RGD:2192 Hk2-Bnip3 Hk2-Bnip3 Hk2-RGD:628670 Hk2-RGD:2192 Hk2-RGD:727970 Eif2ak4-RGD:621252                                                                                                                                                                              |

|                       |            |                                                                         |    |          |         |    |   |       |                                                                                                                                                                                                                                                                                                                                                                                                                                                                                                                                                                                                                                                                                                                                                                                                                                                                                                                                                                                                                                                                                                                                                           |
|-----------------------|------------|-------------------------------------------------------------------------|----|----------|---------|----|---|-------|-----------------------------------------------------------------------------------------------------------------------------------------------------------------------------------------------------------------------------------------------------------------------------------------------------------------------------------------------------------------------------------------------------------------------------------------------------------------------------------------------------------------------------------------------------------------------------------------------------------------------------------------------------------------------------------------------------------------------------------------------------------------------------------------------------------------------------------------------------------------------------------------------------------------------------------------------------------------------------------------------------------------------------------------------------------------------------------------------------------------------------------------------------------|
| GO biological process | GO:0048311 | mitochondrion distribution                                              | 17 | 1.00E-04 | 0.0152  | 53 | 1 | Dnm1l | <p> Appl1-RGD:1307222 Appl1-RGD:1561168 Alkbh5-RGD:69400 Alkbh5-RGD:69436 Sec22b-RGD:69400 Sec22b-RGD:62060 Sec22b-RGD:1561168 Egln1-RGD:69436 Hikeshi-RGD:69436 Foxo4-RGD:62060 Pfkfb3-RGD:69436 Pfkfb3-RGD:1307222 Hspa1a-RGD:69329 Mltl1-RGD:69400 Eif4ebp1-RGD:69436 Acp5-Dnm1l Tspo-RGD:621460 Dnm1l-RGD:628843 Dnm1l-RGD:69400 Dnm1l-RGD:708423 Dnm1l-RGD:69436 Dnm1l-RGD:1307222 Dnm1l-RGD:1561168 Bnip3-RGD:628843 Bnip3-RGD:621460 Bnip3-RGD:69329 Bnip3-RGD:1561168 Slc35e1-RGD:62060 Tomm7-RGD:628843 Tomm7-RGD:621460 Tomm7-RGD:1561168 Higd1a-RGD:621460 Bnip3l-RGD:69329 Nr4a3-Dnm1l Nr4a3-RGD:3091 Nptx1-RGD:708423 Vopp1-RGD:62060 Scrn1-Dnm1l Pdk1-RGD:62060 Noct-Dnm1l Pfk1-RGD:62060 Egln3-Dnm1l Egln3-RGD:1306110 Bcr-RGD:1561168 Kdr-RGD:1561168 Actn1-Dnm1l Vldlr-Dnm1l Hk2-RGD:628843 Hk2-Dnm1l Hk2-RGD:69400 Hk2-RGD:621460 Hk2-RGD:62060 Hk2-RGD:69436 </p>                                                                                                                                                                                                                                                                      |
| GO biological process | GO:0140052 | cellular response to oxidised low-density lipoprotein particle stimulus | 10 | 1.00E-04 | 0.01707 | 35 | 0 |       | <p> Appl1-RGD:2081 Il1rap-RGD:735043 Comt-RGD:735043 Acap1-RGD:2081 Foxo3-RGD:2081 Sec22b-RGD:735043 Egln1-RGD:2081 Hagh-RGD:2301 Foxo4-RGD:2081 Vwa1-RGD:2081 Faslg-RGD:2301 Hbp1-RGD:2081 Id3-RGD:2301 Hspa1a-RGD:2081 Hspa1a-RGD:3870 Mltl1-RGD:3870 Slc22a5-RGD:2081 Slc2a1-RGD:2301 Eif4ebp1-RGD:2081 Fcna-RGD:3870 Jmjd6-RGD:2301 Insig1-RGD:2081 Higd1a-RGD:2301 Slc27a1-RGD:2301 Nr4a3-RGD:2081 Clen3-RGD:3870 Vopp1-RGD:2081 Prcl1-RGD:2081 Pfk1-RGD:735043 Bcr-RGD:2081 Ak4-RGD:2301 Vldlr-RGD:2301 Nol4-RGD:2081 Dusp1-RGD:2081 Dlc1-RGD:2081 </p>                                                                                                                                                                                                                                                                                                                                                                                                                                                                                                                                                                                             |
| GO biological process | GO:0001836 | release of cytochrome c from mitochondria                               | 22 | 4.00E-04 | 0.01574 | 71 | 1 | Dnm1l | <p> Sqle-RGD:2192 Bhlhe40-RGD:2943 Foxo3-RGD:3889 Foxo3-RGD:620103 Sec22b-RGD:628847 Sec22b-RGD:2200 Ero1a-RGD:2192 Pfkfb3-RGD:1306668 Ndr1-RGD:2288 Dnajc3-RGD:620160 Mmp12-RGD:2179 Hspa1a-RGD:70984 Slc2a1-RGD:628847 Eif4ebp1-RGD:1306668 Eif4ebp1-RGD:3889 Kdm3a-RGD:3889 Acp5-Dnm1l Tspo-RGD:620160 Tspo-RGD:2192 Tspo-RGD:620103 Dnm1l-RGD:70984 Dnm1l-RGD:1306668 Dnm1l-RGD:621635 Dnm1l-RGD:620160 Dnm1l-RGD:1310230 Dnm1l-RGD:2200 Bnip3-RGD:1306668 Bnip3-RGD:1310230 Bnip3-RGD:3889 Vsr-RGD:620103 Insig1-RGD:3889 Prkce-RGD:70984 Prkce-RGD:3889 Prkce-RGD:2943 Tomm7-RGD:621635 Tomm7-RGD:620160 Higd1a-RGD:2192 Bnip3l-RGD:2200 Insig2-RGD:1306668 Adams9-RGD:2199 Nr4a3-Dnm1l Nr4a3-RGD:628847 Nr4a3-RGD:2943 Bcl11a-RGD:2199 H33-RGD:620160 Clen3-RGD:2192 Clen3-RGD:2200 Scrn1-Dnm1l Zmynd10-RGD:628847 Zmynd10-RGD:2192 Zmynd10-RGD:3889 Zmynd10-RGD:2199 Pdk1-RGD:3732 Noct-Dnm1l Pfk1-RGD:3889 Egln3-Dnm1l Egln3-RGD:3889 Egln3-RGD:2943 Atp11b-RGD:2179 Cited2-RGD:2943 Bcl6-RGD:3889 Eil-RGD:3889 Kdr-RGD:2192 Kdr-RGD:3889 Actn1-Dnm1l Vldlr-Dnm1l Dnajb9-RGD:70984 Dnajb9-RGD:2192 Hk2-Dnm1l Hk2-RGD:2192 Eif2ak4-RGD:70984 </p> |

|                       |            |                                                   |    |   |         |    |   |                         |                                                                                                                                                                                                                                                                                                                                                                                                                                                                                                                                                                                                                                                                                                                                                                                                                                                                                                                                                            |
|-----------------------|------------|---------------------------------------------------|----|---|---------|----|---|-------------------------|------------------------------------------------------------------------------------------------------------------------------------------------------------------------------------------------------------------------------------------------------------------------------------------------------------------------------------------------------------------------------------------------------------------------------------------------------------------------------------------------------------------------------------------------------------------------------------------------------------------------------------------------------------------------------------------------------------------------------------------------------------------------------------------------------------------------------------------------------------------------------------------------------------------------------------------------------------|
| GO biological process | GO:1903599 | positive regulation of autophagy of mitochondrion | 18 | 0 | 0.01707 | 63 | 3 | Bnip3 Hk2 Tomm7         | Bhlhe40-RGD:61928 Foxo3-RGD:61928 Egln1-RGD:61928 Egln1-RGD:68337 Pfkfb3-Hk2 Hbp1-RGD:61928 Mmp12-RGD:68337 Hspa1a-RGD:1305648 Gpi-Hk2 Mat2b-Hk2 Kdm3a-RGD:61928 Mmp9-RGD:68337 Tspo-Bnip3 Tspo-Hk2 Tspo-RGD:2181 Tspo-Tomm7 Dnm1l-RGD:628843 Dnm1l-RGD:71006 Dnm1l-RGD:1309944 Dnm1l-Hk2 Dnm1l-RGD:1305769 Bnip3-RGD:628843 Bnip3-RGD:61928 Bnip3-RGD:1309944 Bnip3-Hk2 Bnip3-RGD:1305769 Bnip3-Tomm7 Slc35e1-Hk2 Slc35e1-RGD:68337 Tomm7-RGD:628843 Tomm7-RGD:1589149 Tomm7-RGD:1594738 Tomm7-Bnip3 Tomm7-RGD:1309944 Tomm7-Hk2 Tomm7-RGD:1305769 Tomm7-RGD:2181 Bnip3l-Bnip3 Bnip3l-Hk2 Bnip3l-RGD:1305769 Bnip3l-Tomm7 Dnajib1-RGD:71006 Dnajib1-RGD:61928 Vopp1-RGD:68337 Sern1-Hk2 Pdk1-RGD:61928 Prre1-RGD:68337 Pfk1-RGD:61928 Pfk1-Hk2 Pfk1-RGD:68337 Egln3-RGD:61928 Vegfa-RGD:61928 Vegfa-RGD:68337 Kdr-Bnip3 Pgk1-RGD:61928 Dnajib9-RGD:61928 Hk2-RGD:628843 Hk2-Bnip3 Hk2-RGD:1305769 Hk2-RGD:68337 Hk2-Tomm7 Hexb-RGD:1589149 Ksr1-RGD:71006 |
| GO biological process | GO:0016222 | procollagen-proline 4-dioxygenase complex         | 4  | 0 | 0.02073 | 17 | 2 | P4ha1 P4ha2             | P4ha1-RGD:3244 P4ha1-P4ha2 P4ha2-P4ha1 P4ha2-RGD:735150 P4ha2-RGD:3244 Alkbh5-RGD:3244 Ero1a-RGD:3244 Egln1-RGD:735150 Egln1-RGD:3244 Egln1-P4ha2 Surf4-RGD:3244 Jmjd6-P4ha1 Egln3-P4ha1 Egln3-P4ha2 Plod2-P4ha1 Plod2-RGD:3244 Plod2-P4ha2                                                                                                                                                                                                                                                                                                                                                                                                                                                                                                                                                                                                                                                                                                                |
| GO biological process | GO:0010940 | positive regulation of necrotic cell death        | 13 | 0 | 0.01613 | 43 | 2 | Tspo Bnip3              | Pygl-RGD:628899 Narf-Tspo Foxo3-RGD:3889 Sec22b-RGD:628899 Sphk1-RGD:619956 Faslg-RGD:620018 Ndr1-RGD:620018 Ndr1-RGD:621872 Slc2a1-RGD:61912 Eif4ebp1-RGD:3889 Kdm3a-RGD:3889 Jmjd6-Tspo Tspo-Bnip3 Tspo-RGD:621252 Dnm1l-RGD:621252 Dnm1l-RGD:621872 Bnip3-Tspo Bnip3-RGD:3889 Map3k8-RGD:1310158 Insig1-RGD:3889 Prkcq-RGD:3889 Tomm7-Tspo Tomm7-Bnip3 Bnip3l-Bnip3 Bnip3l-RGD:621252 Ii33-RGD:628899 Clcn3-RGD:621872 Hp-RGD:621252 Parp16-RGD:628899 Zmynd10-RGD:3889 Pfk1-RGD:3889 Egln3-RGD:3889 Prepl-Tspo Zap70-RGD:1310158 Bcl6-RGD:3889 Vegfa-RGD:621252 Ell-RGD:3889 Kdr-Bnip3 Kdr-RGD:621252 Kdr-RGD:3889 Hk2-Tspo Hk2-Bnip3 Eif2ak4-RGD:621252                                                                                                                                                                                                                                                                                               |
| GO biological process | GO:0031545 | peptidyl-proline 4-dioxygenase activity           | 7  | 0 | 0.01951 | 28 | 4 | P4ha1 Egln3 P4ha2 Egln1 | P4ha1-Egln3 P4ha1-RGD:3244 P4ha1-P4ha2 P4ha2-P4ha1 P4ha2-RGD:735150 P4ha2-Egln3 P4ha2-RGD:3244 P4ha2-RGD:631376 P4ha2-Egln1 Alkbh5-RGD:3244 Ero1a-RGD:3244 Egln1-RGD:735150 Egln1-Egln3 Egln1-RGD:3244 Egln1-RGD:631376 Egln1-P4ha2 Surf4-RGD:3244 Jmjd6-P4ha1 Jmjd6-Egln3 Dnm1l-Egln3 Dnm1l-RGD:631376 Egln3-P4ha1 Egln3-RGD:631376 Egln3-P4ha2 Egln3-Egln1 Plod2-P4ha1 Plod2-RGD:3244 Plod2-P4ha2                                                                                                                                                                                                                                                                                                                                                                                                                                                                                                                                                        |

GO biological process GO:1903146 regulation of autophagy of mitochondrion 38 0 0.01643 128 6

Bnip3|Tspo|Dnm1|Bnip3|Hk2|Tom7

App1-RGD:620351|Narf-1spo|Arrdc3-RGD:2321145|Comt-RGD:1307751|Comt-RGD:2321145|Comt-RGD:1306191|Bhlhe40-RGD:69423|Bhlhe40-RGD:61928|Foxo3-RGD:61928|Foxo3-RGD:3889|Egln1-RGD:61928|Egln1-RGD:68337|Pfkfb3-Hk2|Faslg-RGD:620351|Hbp1-RGD:61928|Mmp12-RGD:2321145|Mmp12-RGD:68337|Hspa1a-RGD:1305648|Mltl1-RGD:621575|Gpr1-RGD:619839|Slc2a1-RGD:2321145|Gpi-RGD:1307949|Gpi-Hk2|Mat2b-Hk2|Eif4ebp1-RGD:3889|Kdm3a-RGD:61928|Kdm3a-RGD:3889|Ceng2-RGD:620351|Fena-RGD:2321145|Mmp9-RGD:68337|Ujmd6-Tspo|Acp5-Dnm1|Tspo-RGD:621575|Tspo-Bnip3|Tspo-Hk2|Tspo-RGD:2181|Tspo-Tomm7|Dnm1-RGD:628843|Dnm1-RGD:71006|Dnm1-RGD:1309944|Dnm1-RGD:621575|Dnm1-Hk2|Dnm1-RGD:1305769|Bnip3-RGD:628843|Bnip3-Bnip3|Bnip3-RGD:1309944|Bnip3-Tspo|Bnip3-RGD:61928|Bnip3-Hk2|Bnip3-RGD:1305769|Bnip3-RGD:3889|Bnip3-Tomm7|Slc35e1-Hk2|Slc35e1-RGD:68337|Insig1-RGD:3889|Prkcq-RGD:620351|Prkcq-RGD:1306882|Prkcq-RGD:3889|Tomm7-RGD:628843|Tomm7-Bnip3|Tomm7-RGD:1309944|Tomm7-RGD:1560038|Tomm7-Tspo|Tomm7-RGD:1589149|Tomm7-RGD:1560364|Tomm7-RGD:1594738|Tomm7-Bnip3|Tomm7-Hk2|Tomm7-RGD:1305769|Tomm7-RGD:2181|Bnip31-RGD:620351|Bnip31-RGD:621575|Bnip31-Bnip3|Bnip31-Hk2|Bnip31-RGD:1305769|Bnip31-Tomm7|Dnajb1-RGD:71006|Dnajb1-RGD:61928|Nr4a3-RGD:69423|Nr4a3-RGD:620351|Nr4a3-Dnm1|Bcl11a-RGD:1307751|Il33-RGD:620351|Il33-RGD:2321145|Clen3-RGD:621575|Vopp1-RGD:68337|Sern1-Dnm1|Sern1-Hk2|Parp16-RGD:620351|Parp16-RGD:621575|Zmynd10-RGD:3889|Pdk1-RGD:61928|Noct-Dnm1|Prcl-RGD:68337|Pfk1-RGD:61928|Pfk1-Hk2|Pfk1-RGD:3889|Pfk1-RGD:68337|Egln3-Dnm1|Egln3-RGD:61928|Egln3-RGD:3889|Prepl-Tspo|Prepl-RGD:621575|Bcl6-RGD:3889|Vegfa-RGD:61928|Vegfa-RGD:68337|Ell-RGD:3889|Kdr-RGD:1307949|Kdr-Bnip3|Kdr-RGD:3889|Acl1-Dnm1|Pck1-RGD:61928|Vhlr-Dnm1|Dnajb9-RGD:61928|Hk2-App1-RGD:2082|App1-RGD:2081|Ppp1-RGD:68371|Pyg-RGD:68371|Narf-RGD:628841|Arrdc3-RGD:628841|Arrdc3-RGD:9292348|Arrdc3-RGD:2866|Il1r2-RGD:2901|Il1r2-RGD:68371|Comt-RGD:628841|Acap1-RGD:2081|Bhlhe40-RGD:3032|Foxo3-RGD:3032|Foxo3-RGD:2081|Cd200-RGD:2513|Alkbh5-RGD:3234|Sec22b-RGD:628841|Sec22b-RGD:628847|Sec22b-RGD:61924|Sec22b-RGD:631409|Egln1-RGD:1559992|Egln1-RGD:631409|Egln1-RGD:2081|Hagh-RGD:2301|Foxo4-RGD:2581|Foxo4-RGD:3032|Foxo4-RGD:2081|Tspan31-RGD:68371|Vwa1-RGD:2581|Vwa1-RGD:2081|Faslg-RGD:2301|Faslg-RGD:2857|Faslg-RGD:3876|Ndr1-RGD:2411|Ndr1-RGD:620349|Ndr1-RGD:3876|Hbp1-RGD:2581|Hbp1-RGD:2081|Mmp12-RGD:631408|Id3-RGD:2301|Hspa1a-RGD:3907|Hspa1a-RGD:2081|Hspa1a-RGD:3870|Mlt11-RGD:2857|Mlt11-RGD:2866|Mlt11-RGD:3870|Slc22a5-RGD:2082|Slc22a5-RGD:2081|Cblb-RGD:2830|Cblb-RGD:2139|Slc2a1-RGD:2301|Slc2a1-RGD:628847|Slc2a1-RGD:628758|Slc2a1-RGD:620349|Slc2a1-RGD:2082|Gpi-RGD:2901|Gpi-RGD:3876|Lrrc8a-RGD:68371|Eif4ebp1-RGD:2081|Eif4ebp1-RGD:68371|Kdm3a-RGD:3032|Efna1-RGD:2139|Efna1-RGD:68371|Fena-RGD:3870|Mmp9-RGD:3032|Mmp9-RGD:3907|Mmp9-RGD:631408|Ujmd6-RGD:2301|Acp5-RGD:9292348|Dnm11-RGD:2513|Dnm11-RGD:2139|Dnm11-RGD:9292348|Bnip3-RGD:628841|Bnip3-RGD:2139|Slc35e1-RGD:61924|Slc35e1-RGD:2917|Slc35e1-RGD:2082|Vsr-RGD:3032|Acvrl1-RGD:631409|Acvrl1-RGD:68371|Map3k8-RGD:631409|Insig1-RGD:2081|Prkcq-RGD:621445|Prkcq-RGD:3876|Higd1a-RGD:2301|Bnip31-RGD:628841|Slc27a1-RGD:2301|Slc27a1-RGD:620349|Slc27a1-RGD:3876|Klc4-RGD:2163|Klc4-RGD:2082|Nr4a3-RGD:628847|Nr4a3-RGD:2082|Nr4a3-RGD:2081|Nr4a3-RGD:68371|Bcl11a-RGD:2139|Clen3-RGD:2513|Clen3-RGD:3234|Clen3-RGD:3907|Clen3-RGD:2857|Clen3-RGD:631409|Clen3-RGD:2163|Clen3-RGD:3870|Nptx1-RGD:3234|Wnt4-RGD:2891|Wnt4-RGD:2901|Wnt4-RGD:2139|Wnt4-RGD:1559992|Wnt4-RGD:2069|Vonn1-RGD:2581|Vonn1-RGD:61924|Vonn1-

GO biological process GO:0045429 positive regulation of nitric oxide biosynthetic process 48 9.00E-04 0.01626 160 0

|                       |            |                                                            |    |          |         |    |   |             |                                                                                                                                                                                                                                                                                                                                                                                                                                                                                                                                                                                                                                                                                                                                                                                                                                                                          |
|-----------------------|------------|------------------------------------------------------------|----|----------|---------|----|---|-------------|--------------------------------------------------------------------------------------------------------------------------------------------------------------------------------------------------------------------------------------------------------------------------------------------------------------------------------------------------------------------------------------------------------------------------------------------------------------------------------------------------------------------------------------------------------------------------------------------------------------------------------------------------------------------------------------------------------------------------------------------------------------------------------------------------------------------------------------------------------------------------|
| GO biological process | GO:0035794 | positive regulation of mitochondrial membrane permeability | 17 | 0        | 0.01578 | 55 | 2 | Bnip3 Bnip3 | Sqle-RGD:2192 Gpt-RGD:1306551 Foxo3-RGD:3889 Sec22b-RGD:1306551 Ero1a-RGD:2192 Vwa1-RGD:3718 Ndr1-RGD:628774 Dnajc3-RGD:620160 Dnajc3-RGD:3718 Cblb-RGD:1306551 Eif4ebp1-RGD:3889 Kdm3a-RGD:3889 Tspo-RGD:620160 Tspo-Bnip3 Tspo-RGD:628774 Tspo-RGD:2192 Dnm1l-RGD:620160 Dnm1l-RGD:628774 Dnm1l-RGD:727970 Bnip3-Bnip3 Bnip3-RGD:1307023 Bnip3-RGD:3889 Insig1-RGD:3889 Prkcq-RGD:3889 Prkcq-RGD:621862 Tomm7-Bnip3 Tomm7-RGD:1307023 Tomm7-RGD:620160 Tomm7-Bnip3 Higd1a-RGD:628670 Higd1a-RGD:2192 Higd1a-RGD:621862 Higd1a-RGD:727970 Bnip3-Bnip3 Ii33-RGD:620160 Clcn3-RGD:2192 Zmynd10-RGD:2192 Zmynd10-RGD:3889 Pdk1-RGD:727940 Pfk1-RGD:3889 Egln3-RGD:3889 Prep1-RGD:621862 Bcl6-RGD:3889 Vegfa-RGD:1306551 Eil1-RGD:3889 Kdr-Bnip3 Kdr-RGD:2192 Kdr-RGD:3889 Vldlr-RGD:1306551 Dnajb9-RGD:2192 Hk2-Bnip3 Hk2-Bnip3 Hk2-RGD:628670 Hk2-RGD:2192 Hk2-RGD:727970 |
| GO biological process | GO:0140212 | regulation of long-chain fatty acid import into cell       | 8  | 0.001    | 0.02439 | 40 | 0 |             | Appl1-RGD:69316 Appl1-RGD:2082 Appl1-RGD:2081 Slc27a3-RGD:69403 Gpt-RGD:69403 Acap1-RGD:2081 Foxo3-RGD:2081 Egln1-RGD:2081 Foxo4-RGD:2081 Vwa1-RGD:2081 Hbp1-RGD:2081 Id3-RGD:69048 Hspa1a-RGD:69403 Hspa1a-RGD:2081 Slc22a5-RGD:2082 Slc22a5-RGD:2081 Slc2a1-RGD:2082 Eif4ebp1-RGD:2081 Rasd1-RGD:69048 Slc35e1-RGD:2082 Insig1-RGD:2081 Slc27a1-RGD:69403 Slc27a1-RGD:69402 Klc4-RGD:2082 Nr4a3-RGD:2082 Nr4a3-RGD:2081 Wnt4-RGD:69048 Vopp1-RGD:2081 Pdk1-RGD:69402 Prre1-RGD:2082 Prre1-RGD:69403 Prre1-RGD:2081 Bcr-RGD:2081 Vegfa-RGD:1588455 Vegfa-RGD:69403 Kdr-RGD:2082 Nol4-RGD:2081 Dusp1-RGD:2081 Dlc1-RGD:2081 Hk2-RGD:2082                                                                                                                                                                                                                                 |
| GO biological process | GO:1905709 | negative regulation of membrane permeability               | 9  | 5.00E-04 | 0.01788 | 33 | 2 | Hk2 Bnip3   | Hikeshi-RGD:620261 Pfkfb3-Hk2 Gpi-Hk2 Mat2b-Hk2 Tspo-Hk2 Tspo-RGD:620352 Tspo-Bnip3 Dnm1l-Hk2 Dnm1l-RGD:620352 Dnm1l-RGD:708558 Bnip3-Hk2 Bnip3-RGD:620261 Bnip3-RGD:620482 Slc35e1-Hk2 Tomm7-Hk2 Tomm7-RGD:708558 Tomm7-Bnip3 Higd1a-RGD:620352 Higd1a-RGD:708558 Bnip3l-Hk2 Bnip3l-RGD:620352 Bnip3l-Bnip3 Slc27a1-RGD:708558 Scrn1-Hk2 Pdk1-RGD:708558 Pfk1-Hk2 Prep1-RGD:708558 Kdr-Bnip3 Vldlr-RGD:708558 Hk2-RGD:620352 Hk2-RGD:708558 Hk2-RGD:620482 Hk2-Bnip3                                                                                                                                                                                                                                                                                                                                                                                                    |
| GO biological process | GO:0001893 | maternal placenta development                              | 12 | 1.00E-04 | 0.01585 | 39 | 0 |             | Appl1-RGD:2081 Acap1-RGD:2081 Bhlhe40-RGD:69305 Bhlhe40-RGD:3611 Bhlhe40-RGD:3610 Foxo3-RGD:2081 Egln1-RGD:2081 Hagh-RGD:2301 Foxo4-RGD:2081 Vwa1-RGD:2081 Faslg-RGD:2301 Hbp1-RGD:2081 Id3-RGD:2301 Id3-RGD:69305 Id3-RGD:3610 Hspa1a-RGD:2081 Slc22a5-RGD:2081 Slc2a1-RGD:2301 Eif4ebp1-RGD:2081 Kdm3a-RGD:3611 Efna1-RGD:71082 Jmjd6-RGD:2301 Dnm1l-RGD:3611 Insig1-RGD:2081 Higd1a-RGD:2301 Slc27a1-RGD:2301 Nr4a3-RGD:2081 Bcl11a-RGD:69305 Vopp1-RGD:2081 Prre1-RGD:2081 Bcr-RGD:2081 Ak4-RGD:2301 Vegfa-RGD:71082 Cdkn1b-RGD:69305 Vldlr-RGD:2301 Nol4-RGD:2081 Dusp1-RGD:2081 Dlc1-RGD:2081 Eif2ak4-RGD:71082                                                                                                                                                                                                                                                    |

|                       |            |                                                        |    |          |         |     |   |          |                                                                                                                                                                                                                                                                                                                                                                                                                                                                                                                                                                                                                                                                                                                                                                                                                                                                                                                                                                                                                                                                                                                                                                                                                                                                                                                                                                                                                                                                                                                                                                                                                                                                                                                                                                                                                                                                                                                                                                                                                                                                                                                                                                                                                                                                                                                                                                                                                                                                                                                                                                                                                                                                                                                                                                            |
|-----------------------|------------|--------------------------------------------------------|----|----------|---------|-----|---|----------|----------------------------------------------------------------------------------------------------------------------------------------------------------------------------------------------------------------------------------------------------------------------------------------------------------------------------------------------------------------------------------------------------------------------------------------------------------------------------------------------------------------------------------------------------------------------------------------------------------------------------------------------------------------------------------------------------------------------------------------------------------------------------------------------------------------------------------------------------------------------------------------------------------------------------------------------------------------------------------------------------------------------------------------------------------------------------------------------------------------------------------------------------------------------------------------------------------------------------------------------------------------------------------------------------------------------------------------------------------------------------------------------------------------------------------------------------------------------------------------------------------------------------------------------------------------------------------------------------------------------------------------------------------------------------------------------------------------------------------------------------------------------------------------------------------------------------------------------------------------------------------------------------------------------------------------------------------------------------------------------------------------------------------------------------------------------------------------------------------------------------------------------------------------------------------------------------------------------------------------------------------------------------------------------------------------------------------------------------------------------------------------------------------------------------------------------------------------------------------------------------------------------------------------------------------------------------------------------------------------------------------------------------------------------------------------------------------------------------------------------------------------------------|
| GO biological process | GO:1903715 | regulation of aerobic respiration                      | 8  | 0        | 0.0189  | 31  | 1 | Bnip3    | <p>Bhlhe40-RGD:61928 Foxo3-RGD:61928 Ero1a-RGD:621595 Egln1-RGD:61928 Pfkfb3-RGD:1310547 Hbp1-RGD:61928 Hspa1a-RGD:2861 Kdm3a-RGD:61928 Tspo-Bnip3 Bnip3-RGD:61928 Insig1-RGD:621595 Tomm7-Bnip3 Bnip3l-Bnip3 Dnajb1-RGD:61928 Insig2-RGD:621595 Klc4-RGD:2861 Zmynd10-RGD:621595 Pdk1-RGD:1310547 Pdk1-RGD:61928 Prnc1-RGD:2861 Pfk1-RGD:61928 Pfk1-RGD:621595 Egln3-RGD:61928 Vegfa-RGD:61928 Kdr-Bnip3 Actn1-RGD:621792 Pgk1-RGD:61928 Pgk1-RGD:621595 Dnajb9-RGD:61928 Dnajb9-RGD:621595 Hk2-Bnip3</p> <p>Sqle-RGD:2192 App1-RGD:2081 Pipp1-RGD:2257 Nart1-RGD:2257 Arrdc3-RGD:2259 Arrdc3-RGD:3980 Ii1r2-RGD:2257 Slc27a3-RGD:628878 Acap1-RGD:2081 Foxo3-RGD:2081 Cd200-RGD:2257 Alkbh5-RGD:3980 Sec22b-RGD:628847 Sec22b-RGD:620817 Sec22b-RGD:2258 Sec22b-RGD:631409 Sec22b-RGD:631441 Ero1a-RGD:2192 Egln1-RGD:2259 Egln1-RGD:631409 Egln1-RGD:2081 Sphk1-RGD:1562046 Sphk1-RGD:2258 Sphk1-RGD:2257 Hikeshi-RGD:2259 Foxo4-RGD:2081 Vwa1-RGD:2081 Pfkfb3-RGD:2259 Pfkfb3-RGD:1306668 Pfkfb3-Hk2 Faslg-RGD:1598163 Faslg-RGD:1303260 Faslg-RGD:1307279 Faslg-RGD:1303022 Faslg-RGD:631441 Faslg-RGD:1303049 Faslg-RGD:1562440 Faslg-RGD:1303219 Ndr1-RGD:3980 Ndr1-RGD:621801 Ndr1-RGD:621656 Ndr1-RGD:621741 Dnajc3-RGD:620160 Dnajc3-RGD:628878 Scepl-RGD:2259 Hbp1-RGD:2081 Id3-RGD:62391 Hspa1a-RGD:1305648 Hspa1a-RGD:2081 Gpr1-RGD:2259 Slc22a5-RGD:2257 Slc22a5-RGD:2081 Slc2a1-RGD:628847 Slc2a1-RGD:2319280 Slc2a1-RGD:1307279 Slc2a1-RGD:1303022 Gpi-Hk2 Mat2b-Hk2 Eif4ebp1-RGD:1306668 Eif4ebp1-RGD:2081 Ramp3-RGD:628619 Rasd1-RGD:1562440 Efna1-RGD:2257 Fcna-RGD:2257 Jmjd6-Tspo Tspo-RGD:620160 Tspo-RGD:2192 Tspo-Hk2 Dnm1l-RGD:628843 Dnm1l-RGD:620160 Dnm1l-RGD:2259 Dnm1l-RGD:2258 Dnm1l-RGD:2257 Dnm1l-RGD:1310230 Dnm1l-RGD:62391 Dnm1l-RGD:1306668 Dnm1l-RGD:1308080 Dnm1l-RGD:628878 Dnm1l-Hk2 Dnm1l-RGD:1305769 Dnm1l-RGD:7706142 Bnip3-RGD:628843 Bnip3-RGD:1309005 Bnip3-RGD:1310230 Bnip3-RGD:708467 Bnip3-Tspo Bnip3-RGD:1306668 Bnip3-RGD:1308080 Bnip3-Hk2 Bnip3-RGD:1305769 Slc35e1-Hk2 Acvrl1-RGD:631409 Map3k8-RGD:631409 Insig1-RGD:2081 Prkcq-RGD:628619 Tomm7-RGD:628843 Tomm7-RGD:620160 Tomm7-RGD:708467 Tomm7-Tspo Tomm7-Hk2 Tomm7-RGD:1305769 Tomm7-RGD:1303219 Higd1a-RGD:2192 Bnip3l-RGD:1308080 Bnip3l-Hk2 Bnip3l-RGD:1305769 Slc16a3l-Pipp1-RGD:2756 Pfkfb3-RGD:1306668 Slc22a5-RGD:2756 Eif4ebp1-RGD:1306668 Acp5-Dnm1l Tspo-RGD:621460 Dnm1l-RGD:628843 Dnm1l-RGD:1306668 Dnm1l-RGD:2756 Entpd2-RGD:2756 Bnip3-RGD:628843 Bnip3-RGD:1306668 Bnip3-RGD:621460 Tomm7-RGD:628843 Tomm7-RGD:621460 Higd1a-RGD:621460 Slc16a3-RGD:2756 Insig2-RGD:1306668 Slc27a1-RGD:2756 Nr4a3-Dnm1l Clcn3-RGD:2756 Scrn1-Dnm1l Noct-Dnm1l Egln3-Dnm1l Actn1-Dnm1l Vldlr-Dnm1l Hk2-RGD:628843 Hk2-Dnm1l Hk2-RGD:621460 Hk2-RGD:2756</p> |
| GO biological process | GO:0072655 | establishment of protein localization to mitochondrion | 48 | 0        | 0.01524 | 150 | 2 | Tspo Hk2 | <p>Bhlhe40-RGD:61928 Foxo3-RGD:61928 Egln1-RGD:61928 Ndr1-RGD:3000 Hbp1-RGD:61928 Mmp12-RGD:2179 Kdm3a-RGD:61928 Mmp9-Mmp12 Acp5-RGD:3000 Bnip3-RGD:61928 Dnajb1-RGD:61928 I33-RGD:2448 Pdk1-RGD:61928 Pfk1-RGD:61928 Egln3-RGD:61928 Atp11b-RGD:2179 Vegfa-RGD:61928 Pgk1-RGD:61928 Dnajb9-RGD:61928</p>                                                                                                                                                                                                                                                                                                                                                                                                                                                                                                                                                                                                                                                                                                                                                                                                                                                                                                                                                                                                                                                                                                                                                                                                                                                                                                                                                                                                                                                                                                                                                                                                                                                                                                                                                                                                                                                                                                                                                                                                                                                                                                                                                                                                                                                                                                                                                                                                                                                                  |
| GO biological process | GO:1905395 | response to flavonoid                                  | 8  | 0.001    | 0.01829 | 30  | 1 | Dnm1l    |                                                                                                                                                                                                                                                                                                                                                                                                                                                                                                                                                                                                                                                                                                                                                                                                                                                                                                                                                                                                                                                                                                                                                                                                                                                                                                                                                                                                                                                                                                                                                                                                                                                                                                                                                                                                                                                                                                                                                                                                                                                                                                                                                                                                                                                                                                                                                                                                                                                                                                                                                                                                                                                                                                                                                                            |
| GO biological process | GO:0051541 | elastin metabolic process                              | 6  | 6.00E-04 | 0.01544 | 19  | 1 | Mmp12    |                                                                                                                                                                                                                                                                                                                                                                                                                                                                                                                                                                                                                                                                                                                                                                                                                                                                                                                                                                                                                                                                                                                                                                                                                                                                                                                                                                                                                                                                                                                                                                                                                                                                                                                                                                                                                                                                                                                                                                                                                                                                                                                                                                                                                                                                                                                                                                                                                                                                                                                                                                                                                                                                                                                                                                            |

|                       |            |                                                                               |    |          |         |    |   |                         |                                                                                                                                                                                                                                                                                                                                                                                                                                                                                                                                                                                                                                                                                                       |
|-----------------------|------------|-------------------------------------------------------------------------------|----|----------|---------|----|---|-------------------------|-------------------------------------------------------------------------------------------------------------------------------------------------------------------------------------------------------------------------------------------------------------------------------------------------------------------------------------------------------------------------------------------------------------------------------------------------------------------------------------------------------------------------------------------------------------------------------------------------------------------------------------------------------------------------------------------------------|
| GO biological process | GO:0002248 | connective tissue replacement involved in inflammatory response wound healing | 5  | 0        | 0.02341 | 24 | 0 |                         | Narf-RGD:2890 Ii1r2-RGD:2890 Bhlhe40-RGD:61928 Foxo3-RGD:61928 Egln1-RGD:61928 Sphk1-RGD:2586 Faslg-RGD:2890 Ndr1-RGD:621675 Dnajc3-RGD:2890 Hbp1-RGD:61928 Kdm3a-RGD:61928 Mmp9-RGD:621675 Acp5-RGD:2890 Bnip3-RGD:61928 Dnajb1-RGD:61928 Slc27a1-RGD:2586 Wnt4-RGD:2890 Parp16-RGD:2890 Pdk1-RGD:61928 Pfk1-RGD:61928 Egln3-RGD:61928 Vegfa-RGD:61928 Pgk1-RGD:61928 Dnajb9-RGD:61928                                                                                                                                                                                                                                                                                                               |
| GO biological process | GO:0097411 | hypoxia-inducible factor-1alpha signaling pathway                             | 4  | 1.00E-04 | 0.01829 | 15 | 1 | Pdk1                    | Bhlhe40-RGD:61928 Foxo3-RGD:61928 Egln1-RGD:61928 Hbp1-RGD:61928 Kdm3a-RGD:61928 Bnip3-RGD:61928 Dnajb1-RGD:61928 Pdk1-RGD:1593276 Pdk1-RGD:61928 Pdk1-RGD:620574 Pfk1-RGD:61928 Egln3-RGD:61928 Vegfa-RGD:61928 Pgk1-RGD:61928 Dnajb9-RGD:61928                                                                                                                                                                                                                                                                                                                                                                                                                                                      |
| GO biological process | GO:1990910 | response to hypobaric hypoxia                                                 | 8  | 0        | 0.0189  | 31 | 1 | Dnm11                   | Pfkfb3-RGD:1306668 Ndr1-RGD:620402 Hspa1a-RGD:620913 Gpr1-RGD:620402 Eif4ebp1-RGD:1306668 Acp5-Dnm11 Tspo-RGD:621460 Dnm11-RGD:628843 Dnm11-RGD:1306668 Dnm11-RGD:620402 Bnip3-RGD:628843 Bnip3-RGD:1306668 Bnip3-RGD:621460 Tomm7-RGD:628843 Tomm7-RGD:621460 Higd1a-RGD:621460 Dnajb1-RGD:620913 Insig2-RGD:1306668 Nr4a3-Dnm11 Scrn1-Dnm11 Zmynd10-RGD:621539 Noct-Dnm11 Egln3-Dnm11 Bcl6-RGD:620913 Vegfa-RGD:620402 Plau-RGD:620402 Actn1-Dnm11 Vldlr-Dnm11 Hk2-RGD:628843 Hk2-Dnm11 Hk2-RGD:621460                                                                                                                                                                                              |
| GO biological process | GO:0097237 | cellular response to toxic substance                                          | 13 | 2.00E-04 | 0.01538 | 41 | 0 |                         | Narf-RGD:61845 Bhlhe40-RGD:61928 Foxo3-RGD:61928 Sec22b-RGD:61845 Sec22b-RGD:62060 Sec22b-RGD:632280 Egln1-RGD:61928 Foxo4-RGD:62060 Pfkfb3-RGD:1306668 Faslg-RGD:3876 Ndr1-RGD:3876 Hbp1-RGD:61928 Gpi-RGD:3876 Eif4ebp1-RGD:1306668 Guca1a-RGD:628829 Kdm3a-RGD:61928 Dnm11-RGD:1305769 Dnm11-RGD:1306668 Bnip3-RGD:1305769 Bnip3-RGD:1306668 Bnip3-RGD:61928 Slc35e1-RGD:62060 Prkcq-RGD:632280 Prkcq-RGD:3876 Tomm7-RGD:1305769 Bnip3-RGD:1305769 Dnajb1-RGD:61928 Insig2-RGD:1306668 Slc27a1-RGD:3876 Clcn3-RGD:628829 Vopp1-RGD:62060 Pdk1-RGD:62060 Pdk1-RGD:61928 Pfk1-RGD:62060 Pfk1-RGD:61928 Egln3-RGD:61928 Vegfa-RGD:61928 Pgk1-RGD:61928 Dnajb9-RGD:61928 Hk2-RGD:1305769 Hk2-RGD:62060 |
| GO biological process | GO:0006007 | glucose catabolic process                                                     | 11 | 1.00E-04 | 0.01507 | 34 | 1 | Hk2                     | Foxo3-RGD:1309643 Foxo3-RGD:620103 Sec22b-RGD:2553 Pfkfb3-Hk2 Pfkfb3-RGD:68419 Slc22a5-RGD:6491529 Gpi-Hk2 Gpi-RGD:2554 Gpi-RGD:2553 Mat2b-Hk2 Tspo-Hk2 Tspo-RGD:620103 Dnm11-Hk2 Bnip3-Hk2 Slc35e1-Hk2 Vsr-RGD:620103 Tomm7-Hk2 Bnip3-Hk2 Slc27a1-RGD:2554 Ii33-RGD:2553 Clcn3-RGD:2554 Scrn1-Hk2 Parp16-RGD:2553 Pfk1-Hk2 Pfk1-RGD:68419 Pfk1-RGD:6491529 Egln3-RGD:1309643 Vegfa-RGD:1309329 Kdr-RGD:6491529 Pgk1-RGD:2554 Aldoc-RGD:6491529 Hk2-RGD:2554 Hk2-RGD:68419 Hk2-RGD:3309                                                                                                                                                                                                               |
| GO biological process | GO:0031543 | peptidyl-proline dioxygenase activity                                         | 9  | 0        | 0.01734 | 32 | 4 | P4ha1 Egln3 P4ha2 Egln1 | P4ha1-RGD:1308848 P4ha1-RGD:1304568 P4ha1-Egln3 P4ha1-RGD:3244 P4ha1-P4ha2 P4ha2-P4ha1 P4ha2-RGD:1304568 P4ha2-RGD:735150 P4ha2-Egln3 P4ha2-RGD:3244 P4ha2-RGD:631376 P4ha2-Egln1 Alkbh5-RGD:3244 Ero1a-RGD:3244 Egln1-RGD:735150 Egln1-Egln3 Egln1-RGD:3244 Egln1-RGD:631376 Egln1-P4ha2 Surf4-RGD:3244 Jmjd6-RGD:1308848 Jmjd6-P4ha1 Jmjd6-Egln3 Dnm11-Egln3 Dnm11-RGD:631376 Egln3-P4ha1 Egln3-RGD:631376 Egln3-P4ha2 Egln3-Egln1 Plod2-P4ha1 Plod2-RGD:3244 Plod2-P4ha2                                                                                                                                                                                                                           |

|                       |            |                                                                                          |    |          |         |    |   |           |                                                                                                                                                                                                                                                                                                                                                                                                                                                                                                                                                                     |
|-----------------------|------------|------------------------------------------------------------------------------------------|----|----------|---------|----|---|-----------|---------------------------------------------------------------------------------------------------------------------------------------------------------------------------------------------------------------------------------------------------------------------------------------------------------------------------------------------------------------------------------------------------------------------------------------------------------------------------------------------------------------------------------------------------------------------|
| GO biological process | GO:1902110 | positive regulation of mitochondrial membrane permeability involved in apoptotic process | 11 | 3.00E-04 | 0.01552 | 35 | 1 | Bnip3     | Sqle-RGD:2192 Gpt-RGD:1306551 Sec22b-RGD:1306551 Ero1a-RGD:2192 Ndrp1-RGD:628774 Dnajc3-RGD:620160 Cblb-RGD:1306551 Tspo-RGD:628774 Tspo-RGD:2192 Tspo-RGD:620160 Tspo-Bnip3 Dnm1l-RGD:628774 Dnm1l-RGD:727970 Dnm1l-RGD:620160 Bnip3-RGD:1307023 Prkcq-RGD:621862 Tomm7-RGD:1307023 Tomm7-RGD:620160 Tomm7-Bnip3 Higd1a-RGD:2192 Higd1a-RGD:621862 Higd1a-RGD:727970 Bnip3l-Bnip3 I33-RGD:620160 Clcn3-RGD:2192 Zmynd10-RGD:2192 Prepl-RGD:621862 Vegfa-RGD:1306551 Kdr-RGD:2192 Kdr-Bnip3 Vldlr-RGD:1306551 Dnajb9-RGD:2192 Hk2-RGD:2192 Hk2-RGD:727970 Hk2-Bnip3 |
| GO biological process | GO:0061030 | epithelial cell differentiation involved in mammary gland alveolus development           | 4  | 3.00E-04 | 0.01951 | 16 | 0 |           | Bhlhe40-RGD:2859 Bhlhe40-RGD:61928 Foxo3-RGD:61928 Egln1-RGD:61928 Hbp1-RGD:61928 Id3-RGD:2859 Kdm3a-RGD:61928 Bnip3-RGD:61928 Dnajb1-RGD:61928 Nr4a3-RGD:2859 Pdk1-RGD:61928 Pfkf1-RGD:61928 Egln3-RGD:61928 Vegfa-RGD:61928 Pgk1-RGD:61928 Dnajb9-RGD:61928                                                                                                                                                                                                                                                                                                       |
| GO biological process | GO:0035655 | interleukin-18-mediated signaling pathway                                                | 5  | 1.00E-04 | 0.02731 | 28 | 0 |           | Appl1-RGD:2081 Il1rap-RGD:1308589 Acap1-RGD:2081 Foxo3-RGD:2081 Alkbh5-RGD:3283 Egln1-RGD:2081 Foxo4-RGD:2081 Vwa1-RGD:2081 Hbp1-RGD:2081 Hspal1a-RGD:2081 Mltl1-RGD:2889 Slc22a5-RGD:2081 Eif4ebp1-RGD:2081 Acvrl1-RGD:3283 Insig1-RGD:2081 Slc27a1-RGD:2889 Nr4a3-RGD:2081 Clcn3-RGD:2889 Wnt4-RGD:2889 Vopp1-RGD:2081 Prcc1-RGD:2081 Prepl-RGD:2889 Bcr-RGD:2081 Bcl6-RGD:2889 Kdr-RGD:3283 Nol4-RGD:2081 Dusp1-RGD:2081 Dlc1-RGD:2081                                                                                                                           |
| GO biological process | GO:0035795 | negative regulation of mitochondrial membrane permeability                               | 7  | 2.00E-04 | 0.02299 | 33 | 2 | Hk2 Bnip3 | Hikeshi-RGD:620261 Pfkfb3-Hk2 Gpi-Hk2 Mat2b-Hk2 Tspo-Hk2 Tspo-RGD:620352 Tspo-Bnip3 Dnm1l-Hk2 Dnm1l-RGD:620352 Dnm1l-RGD:708558 Bnip3-Hk2 Bnip3-RGD:620261 Bnip3-RGD:620482 Slc35e1-Hk2 Tomm7-Hk2 Tomm7-RGD:708558 Tomm7-Bnip3 Higd1a-RGD:620352 Higd1a-RGD:708558 Bnip3l-Hk2 Bnip3l-RGD:620352 Bnip3l-Bnip3 Slc27a1-RGD:708558 Scrn1-Hk2 Pdk1-RGD:708558 Pfkf1-Hk2 Prepl-RGD:708558 Kdr-Bnip3 Vldlr-RGD:708558 Hk2-RGD:620352 Hk2-RGD:708558 Hk2-RGD:620482 Hk2-Bnip3                                                                                              |

|                       |            |                                                                     |    |          |         |     |   |             |
|-----------------------|------------|---------------------------------------------------------------------|----|----------|---------|-----|---|-------------|
| GO biological process | GO:1903428 | positive regulation of reactive oxygen species biosynthetic process | 64 | 1.00E-04 | 0.01501 | 197 | 2 | Clcn3 Foxo3 |
| GO biological process | GO:0032909 | regulation of transforming growth factor beta2 production           | 8  | 0        | 0.01829 | 30  | 0 |             |
| GO biological process | GO:0006848 | pyruvate transport                                                  | 4  | 2.00E-04 | 0.01829 | 15  | 0 |             |

P4ha1-RGD:6205 /3|App11-RGD:2082|App11-RGD:2081|App11-RGD:2 /56|P1pp1-RGD:68371|Pygl-RGD:68371|Narf-RGD:628841|Arrdc3-RGD:628841|Arrdc3-RGD:9292348|Arrdc3-RGD:2866|Ili1r2-RGD:2901|Ili1r2-RGD:68371|Comt-RGD:628841|Acap1-RGD:2081|Bhlhe40-RGD:3032|Foxo3-RGD:2081|Foxo3-RGD:3032|Cd200-RGD:2513|Alkbh5-RGD:3234|Sec22b-RGD:628841|Sec22b-RGD:628847|Sec22b-RGD:631409|Sec22b-RGD:62060|Sec22b-RGD:619979|Sec22b-RGD:61924|Sec22b-RGD:621808|Egln1-RGD:631409|Egln1-RGD:2081|Egln1-RGD:1559992|Hagh-RGD:2301|Hagh-RGD:621808|Foxo4-RGD:2581|Foxo4-Foxo3|Foxo4-RGD:2081|Foxo4-RGD:62060|Foxo4-RGD:3032|Tspan31-RGD:68371|Vwa1-RGD:2581|Vwa1-RGD:2081|Faslg-RGD:2857|Faslg-RGD:2301|Faslg-RGD:621808|Faslg-RGD:3876|Ndr1-RGD:2898|Ndr1-RGD:621872|Ndr1-RGD:2411|Ndr1-RGD:620349|Ndr1-RGD:3876|Dnajc3-RGD:620573|Hbp1-RGD:2581|Hbp1-RGD:2081|Mmp12-RGD:631408|Id3-RGD:2301|Hspa1a-RGD:3907|Hspa1a-RGD:2081|Hspa1a-RGD:3870|Mlt11-RGD:2857|Mlt11-RGD:2866|Mlt11-RGD:3870|Gpr1-Clcn3|Slc22a5-RGD:620573|Slc22a5-RGD:2082|Slc22a5-RGD:2081|Cblb-RGD:2139|Cblb-RGD:2830|Slc2a1-RGD:628847|Slc2a1-RGD:2082|Slc2a1-RGD:2301|Slc2a1-RGD:628758|Slc2a1-RGD:620349|Gpi-RGD:2901|Gpi-RGD:3876|Lrrc8a-RGD:68371|Eif4ebp1-RGD:2081|Eif4ebp1-RGD:68371|Kdm3a-RGD:3032|Efn1-RGD:2139|Efn1-RGD:68371|Fcna-RGD:3870|Mmp9-RGD:3907|Mmp9-RGD:631408|Mmp9-RGD:3032|Mjmd6-RGD:2301|Acp5-RGD:9292348|Acp5-RGD:620573|Dnm1l-RGD:628843|Dnm1l-RGD:2513|Dnm1l-RGD:2139|Dnm1l-RGD:621872|Dnm1l-RGD:9292348|Dnm1l-RGD:620918|Bnip3-RGD:628843|Bnip3-RGD:628841|Bnip3-RGD:2139|Slc35e1-RGD:2082|Slc35e1-RGD:62060|Slc35e1-RGD:61924|Slc35e1-RGD:2917|Vsr-RGD:3032|Acvrl1-RGD:631409|Acvrl1-RGD:68371|Map3k8-RGD:631409|Insig1-RGD:2081|Prkcq-RGD:621445|Prkcq-RGD:3876|Tomm7-RGD:628843|Higd1a-RGD:2301|Bnip3l-RGD:628841|Rasn1-RGD:621808|Slc27a1-RGD:2301|Slc27a1-Bhlhe40-RGD:3032|Bhlhe40-RGD:2666|Bhlhe40-RGD:61928|Foxo3-RGD:3032|Foxo3-RGD:3033|Foxo3-RGD:61928|Egln1-RGD:61928|Foxo4-RGD:3032|Foxo4-RGD:3033|Hbp1-RGD:61928|Kdm3a-RGD:3032|Kdm3a-RGD:61928|Mmp9-RGD:3032|Bnip3-RGD:61928|Vsr-RGD:3032|Prkcq-RGD:621862|Higd1a-RGD:621862|Dnajb1-RGD:61928|Fbln1-RGD:3032|Fbln1-RGD:3033|Pdk1-RGD:61928|Pfk1-RGD:61928|Egln3-RGD:2666|Egln3-RGD:61928|Prepl-RGD:621862|Cited2-RGD:3032|Vegfa-RGD:61928|Plau-RGD:70491|Pgk1-RGD:61928|Dnajb9-RGD:61928

Bhlhe40-RGD:3130|Foxo3-RGD:3130|Hbp1-RGD:3130|Slc22a5-RGD:3691|Slc2a1-RGD:3691|Gpi-RGD:1563422|Eif4ebp1-RGD:3130|Slc16a3-RGD:3130|Slc27a1-RGD:620902|Nr4a3-RGD:3130|Mnt-RGD:3130|Pdk1-RGD:3130|Pdk1-RGD:620902|Pdk1-RGD:1563422|Plau-RGD:3130

|                       |            |                                                                                          |    |          |         |    |   |             |                                                                                                                                                                                                                                                                                                                                                                                                                                                                                                                                                                                                                                                                                                                                                                                                                                                                  |
|-----------------------|------------|------------------------------------------------------------------------------------------|----|----------|---------|----|---|-------------|------------------------------------------------------------------------------------------------------------------------------------------------------------------------------------------------------------------------------------------------------------------------------------------------------------------------------------------------------------------------------------------------------------------------------------------------------------------------------------------------------------------------------------------------------------------------------------------------------------------------------------------------------------------------------------------------------------------------------------------------------------------------------------------------------------------------------------------------------------------|
| GO biological process | GO:0048312 | intracellular distribution of mitochondria                                               | 12 | 0        | 0.02113 | 52 | 1 | Dnm1l       | <p>Appl1-RGD:1561168 Appl1-RGD:1307222 Alkbh5-RGD:69400 Alkbh5-RGD:69436 Sec22b-RGD:69400 Sec22b-RGD:1561168 Sec22b-RGD:62060 Egln1-RGD:69436 Hikeshi-RGD:69436 Foxo4-RGD:62060 Pfkfb3-RGD:69436 Pfkfb3-RGD:1307222 Hspa1a-RGD:69329 Mltl1-RGD:69400 Eif4ebp1-RGD:69436 Acp5-Dnm1l Tspo-RGD:621460 Dnm1l-RGD:628843 Dnm1l-RGD:69400 Dnm1l-RGD:708423 Dnm1l-RGD:1561168 Dnm1l-RGD:69436 Dnm1l-RGD:1307222 Bnip3-RGD:628843 Bnip3-RGD:621460 Bnip3-RGD:69329 Bnip3-RGD:1561168 Slc35e1-RGD:62060 Tomm7-RGD:628843 Tomm7-RGD:621460 Tomm7-RGD:1561168 Higd1a-RGD:621460 Bnip3l-RGD:69329 Nr4a3-Dnm1l Nr4a3-RGD:3091 Nptx1-RGD:708423 Vopp1-RGD:62060 Scrn1-Dnm1l Pdk1-RGD:62060 Noct-Dnm1l Pfkf-RGD:62060 Egln3-Dnm1l Bcr-RGD:1561168 Kdr-RGD:1561168 Actn1-Dnm1l Vldlr-Dnm1l Hk2-RGD:628843 Hk2-Dnm1l Hk2-RGD:69400 Hk2-RGD:621460 Hk2-RGD:62060 Hk2-RGD:69436</p> |
| GO biological process | GO:0097709 | connective tissue replacement                                                            | 6  | 1.00E-04 | 0.02113 | 26 | 0 |             | <p>Narf-RGD:3940 Narf-RGD:2890 Ili1r2-RGD:2890 Bhlhe40-RGD:61928 Foxo3-RGD:61928 Egln1-RGD:61928 Sphk1-RGD:2586 Faslg-RGD:2890 Ndr1-RGD:621675 Dnajc3-RGD:2890 Hbp1-RGD:61928 Mltl1-RGD:3940 Kdm3a-RGD:61928 Mmp9-RGD:621675 Acp5-RGD:2890 Bnip3-RGD:61928 Dnajb1-RGD:61928 Slc27a1-RGD:2586 Wnt4-RGD:2890 Parp16-RGD:2890 Pdk1-RGD:61928 Pfkf1-RGD:61928 Egln3-RGD:61928 Vegfa-RGD:61928 Pgk1-RGD:61928 Dnajb9-RGD:61928</p>                                                                                                                                                                                                                                                                                                                                                                                                                                    |
| GO biological process | GO:0070815 | peptidyl-lysine 5-dioxygenase activity                                                   | 4  | 0        | 0.01951 | 16 | 2 | Jmjd6 Plod2 | <p>P4ha1-RGD:621382 P4ha1-Jmjd6 P4ha1-Plod2 P4ha1-RGD:631339 P4ha2-RGD:621382 P4ha2-Plod2 P4ha2-RGD:631339 Alkbh5-Jmjd6 Jmjd6-RGD:621382 Jmjd6-RGD:631339 Tspo-Jmjd6 Egln3-RGD:621382 Egln3-Jmjd6 Egln3-RGD:631339 Plod2-RGD:631339 Hk2-RGD:621382</p>                                                                                                                                                                                                                                                                                                                                                                                                                                                                                                                                                                                                           |
| GO biological process | GO:1902109 | negative regulation of mitochondrial membrane permeability involved in apoptotic process | 4  | 1.00E-04 | 0.02439 | 20 | 1 | Bnip3       | <p>Tspo-RGD:620352 Tspo-Bnip3 Dnm1l-RGD:620352 Dnm1l-RGD:708558 Bnip3-RGD:620482 Tomm7-RGD:708558 Tomm7-Bnip3 Higd1a-RGD:620352 Higd1a-RGD:708558 Bnip3l-RGD:620352 Bnip3l-Bnip3 Slc27a1-RGD:708558 Pdk1-RGD:708558 Prepl-RGD:708558 Kdr-Bnip3 Vldlr-RGD:708558 Hk2-RGD:620352 Hk2-RGD:708558 Hk2-RGD:620482 Hk2-Bnip3</p>                                                                                                                                                                                                                                                                                                                                                                                                                                                                                                                                       |

|                       |            |                                               |    |          |         |     |   |             |                                                                                                                                                                                                                                                                                                                                                                                                                                                                                                                                                                                                                                                                                                                                                                                                                                                                                                                                                                                                                                                                                                                                                                                                                                                                                                                                                                                                                                                                                                                                                                                                                                                                                                                                                                                                                                                                                                                                                                                                                                                                                                                                                                                                                                                                                                                                                                                                                                                                                                                                                                                                                                                                                                                                                                                                                                                                                                                                                                                                                                                                                                                         |
|-----------------------|------------|-----------------------------------------------|----|----------|---------|-----|---|-------------|-------------------------------------------------------------------------------------------------------------------------------------------------------------------------------------------------------------------------------------------------------------------------------------------------------------------------------------------------------------------------------------------------------------------------------------------------------------------------------------------------------------------------------------------------------------------------------------------------------------------------------------------------------------------------------------------------------------------------------------------------------------------------------------------------------------------------------------------------------------------------------------------------------------------------------------------------------------------------------------------------------------------------------------------------------------------------------------------------------------------------------------------------------------------------------------------------------------------------------------------------------------------------------------------------------------------------------------------------------------------------------------------------------------------------------------------------------------------------------------------------------------------------------------------------------------------------------------------------------------------------------------------------------------------------------------------------------------------------------------------------------------------------------------------------------------------------------------------------------------------------------------------------------------------------------------------------------------------------------------------------------------------------------------------------------------------------------------------------------------------------------------------------------------------------------------------------------------------------------------------------------------------------------------------------------------------------------------------------------------------------------------------------------------------------------------------------------------------------------------------------------------------------------------------------------------------------------------------------------------------------------------------------------------------------------------------------------------------------------------------------------------------------------------------------------------------------------------------------------------------------------------------------------------------------------------------------------------------------------------------------------------------------------------------------------------------------------------------------------------------------|
| GO biological process | GO:0071276 | cellular response to cadmium ion              | 32 | 1.00E-04 | 0.01722 | 113 | 1 | Mmp9        | <p>Sqle-RGD:/0500 App11-RGD:/0500 App11-RGD:2543 App11-RGD:2081 Narf-RGD:61307 Gpt-RGD:70500 Acap1-RGD:2081 Bhlhe40-RGD:2943 Foxo3-RGD:70500 Foxo3-RGD:2543 Foxo3-RGD:2081 Sec22b-RGD:628847 Sec22b-RGD:621506 Sec22b-RGD:621227 Sec22b-RGD:68415 Egln1-RGD:2081 Hikeshi-RGD:1306919 Hagh-RGD:1303089 Foxo4-RGD:2081 Vwa1-RGD:2806 Vwa1-RGD:2081 Faslg-RGD:3770 Faslg-RGD:68415 Ndr1-RGD:2081 Ndr1-RGD:2459 Dnajc3-RGD:1306919 Hbp1-RGD:708428 Hbp1-RGD:2081 Mmp12-RGD:2179 Mmp12-RGD:2081 Hspa1a-RGD:3731 Hspa1a-RGD:61307 Hspa1a-RGD:620913 Hspa1a-RGD:2081 Mlt1-RGD:619912 Slc22a5-RGD:2081 Cblb-RGD:61307 Slc2a1-RGD:628847 Slc2a1-RGD:70500 Slc2a1-RGD:621506 Slc2a1-RGD:2806 Gpi-RGD:68415 Eif4ebp1-RGD:2081 Kdm3a-RGD:621227 Rasd1-RGD:621506 Mmp9-RGD:2806 Tspo-RGD:621252 Dnm1-RGD:621252 Dnm1-RGD:2543 Lrfl-RGD:61307 Slc35e1-RGD:2806 Hltf-RGD:621725 Map3k8-RGD:1306661 Insig1-RGD:1303089 Insig1-RGD:2081 Prkq-RGD:1306661 Prkq-RGD:70500 Prkq-RGD:2943 Prkq-RGD:619912 Bnip3-RGD:621252 Dnajb1-RGD:620913 Insig2-RGD:3731 Slc27a1-RGD:3770 Klc4-RGD:3731 Klc4-RGD:61307 Nr4a3-RGD:628847 Nr4a3-RGD:2943 Nr4a3-RGD:2806 Nr4a3-RGD:2081 Il33-RGD:3770 Il33-RGD:619912 Hp-RGD:621252 Vopp1-RGD:2806 Vopp1-RGD:61307 Vopp1-RGD:2081 Scrn1-RGD:61307 Zmynd10-RGD:3770 Zmynd10-RGD:628847 Pdk1-RGD:620574 Noct-RGD:61307 Gzf1-RGD:61307 Prcl-RGD:3731 Prcl-RGD:2806 Prcl-RGD:2081 Pkl-RGD:2543 Egln3-RGD:2943 Egln3-RGD:68415 Prepl-RGD:619912 Bcr-RGD:61307 Bcr-RGD:621725 Bcr-RGD:2081 Atp1b-RGD:2179 Zap70-RGD:61307 Cited2-RGD:2943 Bcl6-RGD:2806 Bcl6-RGD:620913 Tb12-RGD:621506 Vegfa-RGD:621252 Kdr-RGD:70500 Kdr-RGD:621252 Kdr-RGD:1303089 Vldlr-RGD:621227 Dnajb9-RGD:68415 Nol4-RGD:2081 Dusp1-RGD:708428 Dusp1-RGD:3046 Dusp1-RGD:2081 Dlc1-RGD:2081 Hk2-RGD:2543 Fif2ak4-RGD:70500 Fif2ak4-RGD:621506 Fif2ak4-RGD:621252 Ksr1-RGD:620893</p> <p>App11-RGD:3387 App11-RGD:2081 Narf-RGD:2716 Acap1-RGD:2081 Bhlhe40-RGD:3371 Foxo3-RGD:2081 Cd200-RGD:628641 Sec22b-RGD:3387 Sec22b-RGD:2716 Sec22b-RGD:3371 Egln1-RGD:2081 Foxo4-RGD:2081 Vwa1-RGD:2081 Pfkfb3-RGD:620893 Ndr1-RGD:2624 Ndr1-RGD:621074 Ndr1-RGD:619816 Hbp1-RGD:2081 Id3-RGD:620832 Id3-RGD:3371 Hspa1a-RGD:2081 Slc22a5-RGD:61925 Slc22a5-RGD:2081 Slc2a1-RGD:620832 Slc2a1-RGD:3387 Slc2a1-RGD:620893 Eif4ebp1-RGD:2081 Gng2-RGD:2716 Acvrl1-RGD:628641 Insig1-RGD:2081 Prkq-RGD:619816 Prkq-RGD:620893 Dnajb1-RGD:2624 Stbd1-RGD:3371 Nr4a3-RGD:3387 Nr4a3-RGD:2081 Clen3-RGD:61798 Clen3-RGD:620269 Vopp1-RGD:61925 Vopp1-RGD:2081 Parp16-RGD:2716 Prcl-RGD:2081 Prkag2-RGD:3387 Prkag2-RGD:620893 Pfk1-RGD:621248 Prepl-RGD:620893 Bcr-RGD:2081 Bcl6-RGD:61925 Bcl6-RGD:619816 Vegfa-RGD:2624 Vegfa-RGD:621241 Kdr-RGD:2624 Kdr-RGD:620893 Pgk1-RGD:2624 Nol4-RGD:2081 Dusp1-RGD:2081 Dlc1-RGD:2081 Eif2ak4-RGD:3387 Eif2ak4-RGD:620893 Ksr1-RGD:3387 Ksr1-RGD:620893</p> <p>P4ha1-RGD:3244 P4ha1-P4ha2 P4ha2-P4ha1 P4ha2-RGD:735150 P4ha2-RGD:3244 Alkbh5-RGD:3244 Ero1a-RGD:3244 Egln1-RGD:735150 Egln1-RGD:3244 Egln1-P4ha2 Surf4-RGD:3244 Jmjd6-P4ha1 Egln3-P4ha1 Egln3-P4ha2 Plod2-P4ha1 Plod2-RGD:3244 Plod2-P4ha2</p> |
| GO biological process | GO:0071380 | cellular response to prostaglandin E stimulus | 18 | 1.00E-04 | 0.01653 | 61  | 0 |             |                                                                                                                                                                                                                                                                                                                                                                                                                                                                                                                                                                                                                                                                                                                                                                                                                                                                                                                                                                                                                                                                                                                                                                                                                                                                                                                                                                                                                                                                                                                                                                                                                                                                                                                                                                                                                                                                                                                                                                                                                                                                                                                                                                                                                                                                                                                                                                                                                                                                                                                                                                                                                                                                                                                                                                                                                                                                                                                                                                                                                                                                                                                         |
| GO biological process | GO:0004656 | procollagen-proline 4-dioxygenase activity    | 4  | 0        | 0.02073 | 17  | 2 | P4ha1 P4ha2 |                                                                                                                                                                                                                                                                                                                                                                                                                                                                                                                                                                                                                                                                                                                                                                                                                                                                                                                                                                                                                                                                                                                                                                                                                                                                                                                                                                                                                                                                                                                                                                                                                                                                                                                                                                                                                                                                                                                                                                                                                                                                                                                                                                                                                                                                                                                                                                                                                                                                                                                                                                                                                                                                                                                                                                                                                                                                                                                                                                                                                                                                                                                         |

|                       |            |                                                                                              |    |          |         |    |   |          |                                                                                                                                                                                                                                                                                                                                                                                                                                                                                                                                                                                                                                                                                                                                                                                                                                                                                                                                                                                                                                                                                                                                                                                                                                                                                                                                                                                                                                                                                                |
|-----------------------|------------|----------------------------------------------------------------------------------------------|----|----------|---------|----|---|----------|------------------------------------------------------------------------------------------------------------------------------------------------------------------------------------------------------------------------------------------------------------------------------------------------------------------------------------------------------------------------------------------------------------------------------------------------------------------------------------------------------------------------------------------------------------------------------------------------------------------------------------------------------------------------------------------------------------------------------------------------------------------------------------------------------------------------------------------------------------------------------------------------------------------------------------------------------------------------------------------------------------------------------------------------------------------------------------------------------------------------------------------------------------------------------------------------------------------------------------------------------------------------------------------------------------------------------------------------------------------------------------------------------------------------------------------------------------------------------------------------|
| GO biological process | GO:1903377 | negative regulation of oxidative stress-induced neuron intrinsic apoptotic signaling pathway | 5  | 0.001    | 0.02536 | 26 | 0 |          | Narf-RGD:1549738 Bhlhe40-RGD:61928 Foxo3-RGD:61928 Sec22b-RGD:621808 Egln1-RGD:61928 Hagh-RGD:621808 Faslg-RGD:621808 Hbp1-RGD:61928 Kdm3a-RGD:61928 Dnm1l-RGD:1305769 Bnip3-RGD:1305769 Bnip3-RGD:61928 Tomm7-RGD:1305769 Bnip3l-RGD:1305769 Dnajb1-RGD:61928 Basp1-RGD:621808 Ifi27-RGD:621808 Nr4a3-RGD:621808 Pdk1-RGD:61928 Pfk1-RGD:61928 Egln3-RGD:61928 Vegfa-RGD:61928 Pgk1-RGD:621808 Pgk1-RGD:61928 Dnajb9-RGD:61928 Hk2-RGD:1305769                                                                                                                                                                                                                                                                                                                                                                                                                                                                                                                                                                                                                                                                                                                                                                                                                                                                                                                                                                                                                                                |
| GO biological process | GO:1903147 | negative regulation of autophagy of mitochondrion                                            | 8  | 4.00E-04 | 0.01646 | 27 | 1 | Tspo     | Narf-Tspo Foxo3-RGD:3889 Gpi-RGD:1307949 Eif4ebp1-RGD:3889 Kdm3a-RGD:3889 Jmjd6-Tspo Dnm1l-RGD:1305769 Bnip3-Tspo Bnip3-RGD:1305769 Bnip3-RGD:3889 Insig1-RGD:3889 Prkcq-RGD:3889 Tomm7-Tspo Tomm7-RGD:1305769 Tomm7-RGD:1560038 Bnip3l-RGD:1305769 Zmynd10-RGD:3889 Pfk1-RGD:3889 Egln3-RGD:3889 Prepl-Tspo Bcl6-RGD:3889 Eil-RGD:3889 Kdr-RGD:3889 Kdr-RGD:1307949 Hk2-Tspo Hk2-RGD:1305769 Hk2-RGD:1560038                                                                                                                                                                                                                                                                                                                                                                                                                                                                                                                                                                                                                                                                                                                                                                                                                                                                                                                                                                                                                                                                                  |
| GO biological process | GO:0072656 | maintenance of protein location in mitochondrion                                             | 5  | 0        | 0.04    | 41 | 2 | Tspo Hk2 | Appl1-RGD:2081 Narf-Tspo Acap1-RGD:2081 Foxo3-RGD:2081 Egln1-RGD:2081 Foxo4-RGD:2081 Vwa1-RGD:2081 Pfkfb3-Hk2 Hbp1-RGD:2081 Hspa1a-RGD:2081 Slc22a5-RGD:2081 Gpi-Hk2 Mat2b-Hk2 Eif4ebp1-RGD:2081 Jmjd6-Tspo Tspo-Hk2 Dnm1l-Hk2 Dnm1l-RGD:1305769 Bnip3-Tspo Bnip3-Hk2 Bnip3-RGD:1305769 Slc35e1-Hk2 Insig1-RGD:2081 Tomm7-Tspo Tomm7-Hk2 Tomm7-RGD:1305769 Bnip3l-Hk2 Bnip3l-RGD:1305769 Nr4a3-RGD:2081 Vopp1-RGD:2081 Scrn1-Hk2 Prcc1-RGD:2081 Pfk1-Hk2 Prepl-Tspo Bcr-RGD:2081 Nol4-RGD:2081 Dusp1-RGD:2081 Dlc1-RGD:2081 Hk2-Tspo Hk2-RGD:1305769 Hk2-RGD:2796                                                                                                                                                                                                                                                                                                                                                                                                                                                                                                                                                                                                                                                                                                                                                                                                                                                                                                                              |
| GO biological process | GO:0045838 | positive regulation of membrane potential                                                    | 25 | 0        | 0.01756 | 90 | 0 |          | Appl1-RGD:2082 Appl1-RGD:2081 Appl1-RGD:70982 Narf-RGD:621531 Acap1-RGD:2081 Bhlhe40-RGD:3130 Foxo3-RGD:3130 Foxo3-RGD:620103 Foxo3-RGD:2081 Alkbh5-RGD:2518 Sec22b-RGD:70951 Sec22b-RGD:70982 Ero1a-RGD:621595 Egln1-RGD:2081 Foxo4-RGD:2081 Vwa1-RGD:2081 Dnajc3-RGD:620160 Scepl-RGD:1308285 Hbp1-RGD:3130 Hbp1-RGD:2081 Hspa1a-RGD:621531 Hspa1a-RGD:3708 Hspa1a-RGD:2081 Mlt1l-RGD:3708 Slc22a5-RGD:2082 Slc22a5-RGD:2081 Slc2a1-RGD:2082 Mat2b-RGD:621531 Eif4ebp1-RGD:3130 Eif4ebp1-RGD:2081 Tspo-RGD:621460 Tspo-RGD:620160 Tspo-RGD:620103 Dnm1l-RGD:628843 Dnm1l-RGD:1308285 Dnm1l-RGD:620160 Dnm1l-RGD:70982 Bnip3-RGD:628843 Bnip3-RGD:621460 Lrif1-RGD:621531 Slc35e1-RGD:2082 Vsr-RGD:620103 Insig1-RGD:628871 Insig1-RGD:2081 Insig1-RGD:70982 Insig1-RGD:621595 Prkcq-RGD:70982 Tomm7-RGD:628843 Tomm7-RGD:621460 Tomm7-RGD:620160 Higd1a-RGD:621460 Slc16a3-RGD:3130 Insig2-RGD:1308285 Insig2-RGD:70982 Insig2-RGD:621595 Klc4-RGD:3708 Klc4-RGD:2082 Nr4a3-RGD:708413 Nr4a3-RGD:3130 Nr4a3-RGD:2082 Nr4a3-RGD:2081 Nr4a3-RGD:70982 Mnt-RGD:3130 Il33-RGD:620160 Hp-RGD:1587346 Vopp1-RGD:2081 Scrn1-RGD:621531 Scrn1-RGD:3708 Zmynd10-RGD:70951 Zmynd10-RGD:621595 Pdk1-RGD:3130 Noct-RGD:3708 Prcc1-RGD:2082 Prcc1-RGD:2081 Prcc1-RGD:70982 Pfk1-RGD:621595 Egln3-RGD:70982 Bcr-RGD:2081 Kdr-RGD:2082 Plau-RGD:3130 Actn1-RGD:620157 Pgk1-RGD:621595 Dnajb9-RGD:621595 Nol4-RGD:2081 Dusp1-RGD:2081 Dlc1-RGD:2081 Hk2-RGD:628843 Hk2-RGD:621460 Hk2-RGD:2082 Hk2-RGD:70982 |

GO biological process GO:0031264 death-inducing signaling complex 6 7.00E-04 0.01544 19 0

Arrdc3-RGD:2275|Alkbh5-RGD:619831|Sec22b-RGD:620945|Sec22b-RGD:2275|Hikeshi-RGD:619831|Faslg-RGD:620847|Faslg-RGD:619831|Faslg-RGD:620945|Faslg-RGD:2275|Cblb-RGD:2275|Efna1-RGD:620945|Efna1-RGD:2275|Casp6-RGD:620945|Casp6-RGD:2275|Map3k8-RGD:1310158|Wnt4-RGD:619831|Zap70-RGD:1310158|Cdkn1b-RGD:2275|Eif2ak4-RGD:628700

GO biological process GO:0010918 positive regulation of mitochondrial membrane potential 17 0 0.02123 74 0

Appl1-RGD:2082|Appl1-RGD:2081|Appl1-RGD:70982|Acap1-RGD:2081|Bhlhe40-RGD:3130|Foxo3-RGD:3130|Foxo3-RGD:620103|Foxo3-RGD:2081|Sec22b-RGD:70982|Ero1a-RGD:621595|Egln1-RGD:2081|Foxo4-RGD:2081|Vwa1-RGD:2081|Dnajc3-RGD:620160|Scsep1-RGD:1308285|Hbp1-RGD:3130|Hbp1-RGD:2081|Hspa1a-RGD:2081|Slc22a5-RGD:2082|Slc22a5-RGD:2081|Slc2a1-RGD:2082|Eif4ebp1-RGD:3130|Eif4ebp1-RGD:2081|Tspo-RGD:621460|Tspo-RGD:620160|Tspo-RGD:620103|Dnm1l-RGD:628843|Dnm1l-RGD:1308285|Dnm1l-RGD:620160|Dnm1l-RGD:70982|Bnip3-RGD:628843|Bnip3-RGD:621460|Slc35e1-RGD:2082|Vsr-RGD:620103|Insig1-RGD:2081|Insig1-RGD:621595|Insig1-RGD:70982|Prkccq-RGD:70982|Tomm7-RGD:628843|Tomm7-RGD:621460|Tomm7-RGD:620160|Higd1a-RGD:621460|Slc16a3-RGD:3130|Insig2-RGD:1308285|Insig2-RGD:621595|Insig2-RGD:70982|Klc4-RGD:2082|Nr4a3-RGD:3130|Nr4a3-RGD:2082|Nr4a3-RGD:2081|Nr4a3-RGD:70982|Mnt-RGD:3130|Il33-RGD:620160|Hp-RGD:1587346|Vopp1-RGD:2081|Zmynd10-RGD:621595|Pdk1-RGD:3130|Prre1-RGD:2082|Prre1-RGD:2081|Prre1-RGD:70982|Pfk1-RGD:621595|Egln3-RGD:70982|Ber-RGD:2081|Kdr-RGD:2082|Plau-RGD:3130|Pgk1-RGD:621595|Dnajb9-RGD:621595|No14-RGD:2081|Dusp1-RGD:2081|Dlc1-RGD:2081|Hk2-RGD:628843|Hk2-RGD:621460|Hk2-RGD:2082|Hk2-RGD:70982
