# Supplementary material for: OUP accepted manuscript
Source: Oxford University Press journal article supplement (doi:10.1093/database/baaa086), 2020-01-01
Supplement: baaa086_supp.zip [file baaa086_supp.zip]

**Supplementary Table 3. Assessment of feature value qualities.**

| Evidence                | Type feature             | AUC of ROC | AUC > 0.6 | Mark           |
|-------------------------|--------------------------|------------|-----------|----------------|
| Shared Annotation       | biological_process_value | 0.833      | Yes       | ↓ <sup>a</sup> |
|                         | molecular_function_value | 0.791      | Yes       | ↓              |
|                         | cellular_component_value | 0.821      | Yes       | ↓              |
| Coexpression            | RNAseq_value             | 0.758      | Yes       | ↑ <sup>b</sup> |
|                         | Microarray_value         | 0.565      | No        | ↑              |
| Phylogenetic profile    | phyprofile_tanimato_valu | 0.682      | Yes       | ↑              |
|                         | phyprofile_pearson_value | 0.431      | No        | ↑              |
|                         | phyprofile_mutual_value  | 0.513      | No        | ↑              |
| Colocation              | integrated_value         | 0.582      | No        | ↑              |
|                         | knowledge_value          | 0.565      | No        | ↑              |
|                         | predictions_value        | 0.550      | No        | ↑              |
|                         | textmining_value         | 0.540      | No        | ↑              |
| Domain Interactions     | INTERDOM_value           | 0.661      | Yes       | ↑              |
|                         | LLZ_value                | 0.510      | No        | ↑              |
|                         | RDFE_value               | 0.531      | No        | ↑              |
|                         | DIPD_value               | 0.519      | No        | ↑              |
|                         | 3DID_value               | 0.544      | No        | ↑              |
|                         | PINS_value               | 0.527      | No        | ↑              |
|                         | IPPRI_value              | 0.512      | No        | ↑              |
|                         | ME_value                 | 0.545      | No        | ↑              |
|                         | KGIDDI_value             | 0.560      | No        | ↑              |
|                         | APMM_value               | 0.578      | No        | ↑              |
|                         | IPFAM_value              | 0.530      | No        | ↑              |
|                         | DOMAINGA_value           | 0.501      | No        | ↑              |
|                         | RCDP_value               | 0.515      | No        | ↑              |
|                         | TOPDOWN_value            | 0.550      | No        | ↑              |
|                         | DIMA_DPEA_value          | 0.547      | No        | ↑              |
|                         | GPE_value                | 0.572      | No        | ↑              |
|                         | DIMA_DPROF_value         | 0.534      | No        | ↑              |
|                         | PVALUE_value             | 0.506      | No        | ↑              |
|                         | TW_value                 | 0.501      | No        | ↑              |
|                         | HIMAP_value              | 0.508      | No        | ↑              |
|                         | PE_value                 | 0.528      | No        | ↑              |
|                         | DIMA_STRING_value        | 0.522      | No        | ↑              |
|                         | DPEA_value               | 0.505      | No        | ↑              |
| Homologous interactions | inparanoid_value         | 0.577      | No        | ↑              |

<sup>a</sup> ↓ : Lower score provides evidence of interaction<sup>b</sup> ↑ : Higher score provides evidence of interaction
