# Supplementary material for: OUP accepted manuscript
Source: Oxford University Press journal article supplement (doi:10.1093/database/baaa086), 2020-01-01
Supplement: baaa086_supp.zip [file baaa086_supp.zip]

**Supplementary Table 6. Summarization of terms that reported by the original paper and three tools.**

| Main functional categories of the terms | Original paper | DAVID | Gene ontology analysis | PRID/GSLA |
|-----------------------------------------|----------------|-------|------------------------|-----------|
| HIF signaling pathway                   | Yes            | No    | No                     | Yes       |
| oxygen homeostasis                      | Yes            | Yes   | Yes                    | Yes       |
| inflammatory response                   | Yes            | Yes   | Yes                    | Yes       |
| elastin metabolism                      | Yes            | No    | No                     | Yes       |
| mitochondria activity                   | No             | No    | Yes                    | Yes       |
| nitric oxide metabolism                 | No             | No    | No                     | Yes       |
| regulation of development               | Yes            | Yes   | Yes                    | Yes       |
| extracellular matrix organization       | Yes            | Yes   | Yes                    | Yes       |
| carbohydrate metabolic process          | Yes            | Yes   | Yes                    | Yes       |
| lipid metabolic process                 | No             | Yes   | Yes                    | Yes       |
| energy reserve metabolic process        | No             | Yes   | Yes                    | No        |
| ribonucleoside metabolic process        | No             | No    | Yes                    | No        |
| small molecule metabolic process        | No             | No    | Yes                    | No        |
| phosphorus metabolic process            | No             | No    | Yes                    | No        |
| cellular biosynthetic process           | No             | No    | Yes                    | No        |
| regulation of signal transduction       | Yes            | Yes   | Yes                    | Yes       |
| GTP binding                             | No             | Yes   | No                     | No        |
| L-ascorbic acid binding                 | No             | Yes   | No                     | No        |
| ion binding                             | No             | Yes   | No                     | No        |
| proteolysis                             | Yes            | Yes   | Yes                    | Yes       |
| catalytic activity                      | Yes            | Yes   | Yes                    | Yes       |
| cell proliferation                      | Yes            | Yes   | Yes                    | Yes       |
| cell differentiation                    | Yes            | Yes   | Yes                    | Yes       |
| cell-cell adhesion                      | No             | Yes   | Yes                    | No        |
| cell migration                          | Yes            | Yes   | Yes                    | Yes       |
| cell communication                      | No             | No    | Yes                    | No        |
| cellular component                      | No             | Yes   | Yes                    | No        |

|                                      |     |     |     |     |
|--------------------------------------|-----|-----|-----|-----|
| circadian rhythm                     | No  | Yes | No  | No  |
| regulation of transcription          | Yes | Yes | Yes | No  |
| autophagy                            | No  | Yes | Yes | Yes |
| apoptotic process                    | Yes | No  | Yes | Yes |
| cell death                           | Yes | No  | Yes | Yes |
| aging                                | No  | No  | Yes | No  |
| response to stress                   | No  | No  | Yes | Yes |
| cellular response to stimulus        | No  | No  | Yes | Yes |
| sensory perception of smell          | No  | No  | Yes | No  |
| plasma membrane                      | No  | Yes | Yes | Yes |
| microtubule                          | No  | Yes | No  | No  |
| female pregnancy                     | No  | No  | Yes | No  |
| multi-multicellular organism process | No  | No  | Yes | No  |
