# Supplementary material for: OUP accepted manuscript
Source: Oxford University Press journal article supplement (doi:10.1093/database/baaa086), 2020-01-01
Supplement: baaa086_supp.zip [file baaa086_supp.zip]

**Supplementary Table 2. Evidence of functional association and methods to compute feature values.**

| Feature                 | Data source (link) / Data set                                                                                                                              |                                                                                        | Statistics                                                                            |
|-------------------------|------------------------------------------------------------------------------------------------------------------------------------------------------------|----------------------------------------------------------------------------------------|---------------------------------------------------------------------------------------|
| Shared Annotation       | GOC ( <a href="http://geneontology.org/docs/download-go-annotations/">http://geneontology.org/docs/download-go-annotations/</a> )                          | Cellular component<br>Biological process<br>Molecular function                         | Maximum Shared Annotation Score                                                       |
| Homologous Interactions | Inparanoid Score ( <a href="http://inparanoid.sbc.su.se">http://inparanoid.sbc.su.se</a> )                                                                 |                                                                                        | Maximum                                                                               |
| Domain Interaction      | IDDI ( <a href="http://pcode.kaist.ac.kr/iddi/">http://pcode.kaist.ac.kr/iddi/</a> )<br>Pfam ( <a href="http://pfam.xfam.org/">http://pfam.xfam.org/</a> ) | 3DID                                                                                   | Maximum Shared Domain Score                                                           |
|                         |                                                                                                                                                            | IPFAM                                                                                  |                                                                                       |
|                         |                                                                                                                                                            | PINS                                                                                   |                                                                                       |
|                         |                                                                                                                                                            | TW                                                                                     |                                                                                       |
|                         |                                                                                                                                                            | HIMAP                                                                                  |                                                                                       |
|                         |                                                                                                                                                            | DOMAINGA                                                                               |                                                                                       |
|                         |                                                                                                                                                            | PVALUE                                                                                 |                                                                                       |
|                         |                                                                                                                                                            | IPPRI                                                                                  |                                                                                       |
|                         |                                                                                                                                                            | RCDP                                                                                   |                                                                                       |
|                         |                                                                                                                                                            | DIPD                                                                                   |                                                                                       |
|                         |                                                                                                                                                            | RDFF                                                                                   |                                                                                       |
|                         |                                                                                                                                                            | DPEA                                                                                   |                                                                                       |
|                         |                                                                                                                                                            | ME                                                                                     |                                                                                       |
|                         |                                                                                                                                                            | PE                                                                                     |                                                                                       |
|                         |                                                                                                                                                            | DIMA_STRING                                                                            |                                                                                       |
|                         |                                                                                                                                                            | KGIDDI                                                                                 |                                                                                       |
|                         |                                                                                                                                                            | LLZ                                                                                    |                                                                                       |
|                         |                                                                                                                                                            | GPE                                                                                    |                                                                                       |
|                         |                                                                                                                                                            | DIMA_DPROF                                                                             |                                                                                       |
|                         |                                                                                                                                                            | APMM                                                                                   |                                                                                       |
|                         |                                                                                                                                                            | TOPDOWN                                                                                |                                                                                       |
|                         |                                                                                                                                                            | DIMA_DPEA                                                                              |                                                                                       |
|                         |                                                                                                                                                            | INTERDOM                                                                               |                                                                                       |
| Co-localization         | Compartments ( <a href="https://compartments.jensenlab.org/">https://compartments.jensenlab.org/</a> )                                                     | Knowledge channel<br>Experiments channel<br>Text mining channel<br>Predictions channel | Cosine Similarity Score                                                               |
| Co-expression           | COXPRESdb ( <a href="https://coxpresdb.jp/">https://coxpresdb.jp/</a> )                                                                                    | Microarray<br>RNASeq                                                                   | Pearson's Correlation Score                                                           |
| Phylogenetic Profile    | DIOPT ( <a href="http://www.flyrnai.org/diopt">http://www.flyrnai.org/diopt</a> )                                                                          |                                                                                        | Mutual Information Score<br>Pearson's Correlation Score<br>Tanimato Correlation Score |
